# Supplementary material for: Subtype heterogeneity and epigenetic convergence in neuroendocrine prostate cancer
Source: PubMed Central journal article supplement (PMC8486778; doi:10.1038/s41467-021-26042-z), 2021-10-01
Supplement: 41467_2021_26042_MOESM2_ESM.pdf [file 41467_2021_26042_MOESM2_ESM.pdf]

### **Description of Additional Supplementary Files**

File Name: Supplementary Data 1

Description: Motif analysis of ASCL1, NEUROD1 and shared peaks.

File Name: Supplementary Data 2

Description: Genes marked with superenhancers in NEPC models.
