# Supplementary material for: Subtype heterogeneity and epigenetic convergence in neuroendocrine prostate cancer
Source: PubMed Central journal article supplement (PMC8486778; doi:10.1038/s41467-021-26042-z), 2021-10-01
Supplement: 41467_2021_26042_MOESM3_ESM.pdf [file 41467_2021_26042_MOESM3_ESM.pdf]

Supplemental Table 4. Motif analysis

| Cluster | Name                                                            | PValue    | log(PValue) | # Target Seq | % of Targets | # Background | % of Background Sequences with Motif |
|---------|-----------------------------------------------------------------|-----------|-------------|--------------|--------------|--------------|--------------------------------------|
| 1       | E2A(bHLH)/proBcell-E2A-ChIP-Seq(GSE21978)/Homer                 | 1.00E-110 | -255.22705  | 1685         | 58.79%       | 17586.2      | 38.05%                               |
|         | HEB(bHLH)/mES-Heb-ChIP-Seq(GSE53233)/Homer                      | 1.00E-90  | -209.01491  | 1857         | 64.79%       | 21239.3      | 45.96%                               |
|         | Ascl1(bHLH)/NeuralTubes-Ascl1-ChIP-Seq(GSE55840)/Homer          | 1.00E-86  | -199.9032   | 1634         | 57.01%       | 17875.1      | 38.68%                               |
|         | Tcf12(bHLH)/GM12878-Tcf12-ChIP-Seq(GSE32465)/Homer              | 1.00E-68  | -157.55262  | 1152         | 40.20%       | 11653.1      | 25.21%                               |
|         | Ptf1a(bHLH)/Panc1-Ptf1a-ChIP-Seq(GSE47459)/Homer                | 1.00E-67  | -156.4127   | 2031         | 70.87%       | 25387.8      | 54.93%                               |
|         | MyoG(bHLH)/C2C12-MyoG-ChIP-Seq(GSE36024)/Homer                  | 1.00E-64  | -148.82983  | 1139         | 39.74%       | 11650.9      | 25.21%                               |
|         | Myf5(bHLH)/GM-Myf5-ChIP-Seq(GSE24852)/Homer                     | 1.00E-58  | -134.47143  | 804          | 28.05%       | 7413.4       | 16.04%                               |
|         | MyoD(bHLH)/Myotube-MyoD-ChIP-Seq(GSE21614)/Homer                | 1.00E-50  | -115.57859  | 889          | 31.02%       | 8907.5       | 19.27%                               |
|         | Ap4(bHLH)/AML-Tfap4-ChIP-Seq(GSE45738)/Homer                    | 1.00E-44  | -102.41205  | 1119         | 39.04%       | 12443.3      | 26.92%                               |
|         | Tcf21(bHLH)/ArterySmoothMuscle-Tcf21-ChIP-Seq(GSE61369)/Homer   | 1.00E-42  | -97.549444  | 956          | 33.36%       | 10244.9      | 22.17%                               |
|         | Atoh1(bHLH)/Cerebellum-Atoh1-ChIP-Seq(GSE22111)/Homer           | 1.00E-41  | -94.715422  | 1002         | 34.96%       | 10965.4      | 23.73%                               |
|         | NeuroD1(bHLH)/Islet-NeuroD1-ChIP-Seq(GSE30298)/Homer            | 1.00E-31  | -71.472692  | 752          | 26.24%       | 8077.4       | 17.48%                               |
|         | HLH-1(bHLH)/cElegans-Embryo-HLH1-ChIP-Seq(modEncode)/Homer      | 1.00E-31  | -73.398524  | 591          | 20.62%       | 5866.7       | 12.69%                               |
|         | NeuroG2(bHLH)/Fibroblast-NeuroG2-ChIP-Seq(GSE75910)/Homer       | 1.00E-28  | -64.647191  | 1096         | 38.24%       | 13222.3      | 28.61%                               |
|         | TCF4(bHLH)/SHSY5Y-TCF4-ChIP-Seq(GSE96915)/Homer                 | 1.00E-24  | -56.602185  | 1110         | 38.73%       | 13716.6      | 29.68%                               |
|         | Olig2(bHLH)/Neuron-Olig2-ChIP-Seq(GSE30882)/Homer               | 1.00E-22  | -52.903628  | 1138         | 39.71%       | 14278.9      | 30.90%                               |
|         | bZIP52(bZIP)/colamp-bZIP52-DAP-Seq(GSE60143)/Homer              | 1.00E-13  | -30.147818  | 729          | 25.44%       | 9130.3       | 19.76%                               |
|         | SCl(bHLH)/HPC7-Sc1-ChIP-Seq(GSE13511)/Homer                     | 1.00E-09  | -21.814502  | 2217         | 77.36%       | 33404.7      | 72.28%                               |
|         | E-box/Drosophila-Promoters/Homer                                | 1.00E-06  | -14.184119  | 166          | 5.79%        | 1808.7       | 3.91%                                |
|         | VIP1(bZIP)/col-VIP1-DAP-Seq(GSE60143)/Homer                     | 1.00E-05  | -13.747023  | 138          | 4.82%        | 1452.1       | 3.14%                                |
|         | bZIP69(bZIP)/col-bZIP69-DAP-Seq(GSE60143)/Homer                 | 1.00E-04  | -9.562546   | 91           | 3.18%        | 958.5        | 2.07%                                |
| 2       | Slug(Zf)/Mesoderm-Snai2-ChIP-Seq(GSE61475)/Homer                | 1.00E-102 | -235.50077  | 955          | 33.32%       | 7752.4       | 16.77%                               |
|         | E2A(bHLH),near_PU.1/Bcell-PU.1-ChIP-Seq(GSE21512)/Homer         | 1.00E-95  | -220.75889  | 1574         | 54.92%       | 16537.2      | 35.78%                               |
|         | ZEB1(Zf)/PDAC-ZEB1-ChIP-Seq(GSE64557)/Homer                     | 1.00E-72  | -167.48717  | 1565         | 54.61%       | 17512.4      | 37.89%                               |
|         | ZEB2(Zf)/SNU398-ZEB2-ChIP-Seq(GSE103048)/Homer                  | 1.00E-57  | -133.09837  | 1089         | 38.00%       | 11284.4      | 24.42%                               |
|         | NGA4(ABI3VP1)/col-NGA4-DAP-Seq(GSE60143)/Homer                  | 1.00E-44  | -103.50082  | 1752         | 61.13%       | 22160.5      | 47.95%                               |
| 3       | NF1(CTF)/LNCAP-NF1-ChIP-Seq(Unpublished)/Homer                  | 1.00E-38  | -88.691844  | 502          | 17.52%       | 4433.6       | 9.59%                                |
|         | Tlx?(NR)/NPC-H3K4me1-ChIP-Seq(GSE16256)/Homer                   | 1.00E-22  | -52.253879  | 456          | 15.91%       | 4593.6       | 9.94%                                |
| 4       | Nkx2.2(Homeobox)/NPC-Nkx2.2-ChIP-Seq(GSE61673)/Homer            | 1.00E-22  | -51.855894  | 1065         | 37.16%       | 13219.4      | 28.60%                               |
|         | Nkx2.1(Homeobox)/LungAC-Nkx2.1-ChIP-Seq(GSE43252)/Homer         | 1.00E-17  | -39.845184  | 1334         | 46.55%       | 17862        | 38.65%                               |
|         | Nkx2.5(Homeobox)/HL1-Nkx2.5.biotin-ChIP-Seq(GSE21529)/Homer     | 1.00E-15  | -35.173776  | 1067         | 37.23%       | 13958.3      | 30.20%                               |
|         | Bapx1(Homeobox)/VertebralCol-Bapx1-ChIP-Seq(GSE36672)/Homer     | 1.00E-14  | -32.308535  | 988          | 34.47%       | 12895.5      | 27.90%                               |
|         | Nkx3.1(Homeobox)/LNCaP-Nkx3.1-ChIP-Seq(GSE28264)/Homer          | 1.00E-08  | -18.494397  | 963          | 33.60%       | 13290.5      | 28.76%                               |
| 5       | FOXA1(Forkhead)/MCF7-FOXA1-ChIP-Seq(GSE26831)/Homer             | 1.00E-19  | -44.758669  | 316          | 11.03%       | 2975.7       | 6.44%                                |
|         | FOXA1(Forkhead)/LNCAP-FOXA1-ChIP-Seq(GSE27824)/Homer            | 1.00E-16  | -38.344563  | 372          | 12.98%       | 3842.5       | 8.31%                                |
|         | FOXM1(Forkhead)/MCF7-FOXM1-ChIP-Seq(GSE72977)/Homer             | 1.00E-15  | -35.893583  | 327          | 11.41%       | 3318.8       | 7.18%                                |
|         | Foxa3(Forkhead)/Liver-Foxa3-ChIP-Seq(GSE77670)/Homer            | 1.00E-11  | -27.360845  | 125          | 4.36%        | 1010.2       | 2.19%                                |
|         | Foxa2(Forkhead)/Liver-Foxa2-ChIP-Seq(GSE25694)/Homer            | 1.00E-11  | -26.238184  | 284          | 9.91%        | 3013.1       | 6.52%                                |
|         | FOXP1(Forkhead)/H9-FOXP1-ChIP-Seq(GSE31006)/Homer               | 1.00E-11  | -26.384587  | 156          | 5.44%        | 1388.1       | 3.00%                                |
|         | Foxf1(Forkhead)/Lung-Foxf1-ChIP-Seq(GSE77951)/Homer             | 1.00E-11  | -26.376856  | 256          | 8.93%        | 2642.9       | 5.72%                                |
|         | FOXX1(Forkhead)/HEK293-FOXX1-ChIP-Seq(GSE51673)/Homer           | 1.00E-10  | -25.205995  | 326          | 11.37%       | 3606.7       | 7.80%                                |
|         | FoxL2(Forkhead)/Ovary-FoxL2-ChIP-Seq(GSE60858)/Homer            | 1.00E-10  | -24.575174  | 236          | 8.23%        | 2430         | 5.26%                                |
|         | FoxEbox(Forkhead,bHLH)/Panc1-Foxa2-ChIP-Seq(GSE47459)/Homer     | 1.00E-09  | -22.974199  | 437          | 15.25%       | 5224.3       | 11.30%                               |
|         | Foxo3(Forkhead)/U2OS-Foxo3-ChIP-Seq(E-MTAB-2701)/Homer          | 1.00E-09  | -22.596753  | 236          | 8.23%        | 2484.3       | 5.38%                                |
|         | Foxo1(Forkhead)/RAW-Foxo1-ChIP-Seq(Fan_et_al)/Homer             | 1.00E-07  | -16.218182  | 769          | 26.83%       | 10470.1      | 22.66%                               |
|         | FOXX2(Forkhead)/U2OS-FOXX2-ChIP-Seq(E-MTAB-2204)/Homer          | 1.00E-06  | -14.245711  | 222          | 7.75%        | 2564.4       | 5.55%                                |
|         | PHA-4(Forkhead)/cElegans-Embryos-PHA4-ChIP-Seq(modEncode)/Homer | 1.00E-03  | -8.322908   | 989          | 34.51%       | 14531.4      | 31.44%                               |
| 6       | NF1-halfsite(CTF)/LNCaP-NF1-ChIP-Seq(Unpublished)/Homer         | 1.00E-18  | -43.677795  | 1234         | 43.06%       | 16129.2      | 34.90%                               |
|         | HL1(C1Zf)/Treg-ZBTB29-ChIP-Seq(GSE99889)/Homer                  | 1.00E-10  | -25.13493   | 1474         | 51.43%       | 20884.9      | 45.19%                               |
| 7       | bHLHE41(bHLH)/proB-Bhlhe41-ChIP-Seq(GSE93764)/Homer             | 1.00E-18  | -41.630877  | 793          | 27.67%       | 9595.2       | 20.76%                               |
|         | IBL1(bHLH)/Seedling-IBL1-ChIP-Seq(GSE51120)/Homer               | 1.00E-16  | -38.587055  | 1186         | 41.38%       | 15621.4      | 33.80%                               |
|         | ABF1(bZIP)/Arabidopsis-ABF1-ChIP-Seq(GSE80564)/Homer            | 1.00E-13  | -31.472567  | 645          | 22.51%       | 7851         | 16.99%                               |
|         | HIF-1b(HLH)/T47D-HIF1b-ChIP-Seq(GSE59937)/Homer                 | 1.00E-06  | -15.027077  | 617          | 21.53%       | 8251.7       | 17.85%                               |
|         | Pho2(bHLH)/Yeast-Pho2-ChIP-Seq(GSE29506)/Homer                  | 1.00E-06  | -15.073435  | 324          | 11.30%       | 3957.6       | 8.56%                                |
|         | ABIS(bZIP)/col-ABIS-DAP-Seq(GSE60143)/Homer                     | 1.00E-06  | -15.191226  | 271          | 9.46%        | 3206.8       | 6.94%                                |
|         | c-Myc(bHLH)/LNCaP-cMyc-ChIP-Seq(Unpublished)/Homer              | 1.00E-05  | -12.813893  | 341          | 11.90%       | 4308.7       | 9.32%                                |
|         | SPCH(bHLH)/Seedling-SPCH-ChIP-Seq(GSE57497)/Homer               | 1.00E-05  | -12.384714  | 538          | 18.77%       | 7236.6       | 15.66%                               |
|         | E-box/Arabidopsis-Promoters/Homer                               | 1.00E-04  | -9.323711   | 297          | 10.36%       | 3859         | 8.35%                                |
|         | HIF2a(bHLH)/785_O-HIF2a-ChIP-Seq(GSE34871)/Homer                | 1.00E-03  | -8.474795   | 209          | 7.29%        | 2630.8       | 5.69%                                |
|         | HIF-1a(bHLH)/MCF7-HIF1a-ChIP-Seq(GSE28352)/Homer                | 1.00E-03  | -8.500007   | 168          | 5.86%        | 2047         | 4.43%                                |
|         | Pho4(bHLH)/Yeast-Pho4-ChIP-Seq(GSE29506)/Homer                  | 1.00E-03  | -8.308655   | 171          | 5.97%        | 2097.6       | 4.54%                                |
|         | At4g18890(BZR)/col-At4g18890-DAP-Seq(GSE60143)/Homer            | 1.00E-03  | -7.784062   | 131          | 4.57%        | 1560         | 3.38%                                |
|         | PIF7(bHLH)/col-PIF7-DAP-Seq(GSE60143)/Homer                     | 1.00E-03  | -8.167853   | 156          | 5.44%        | 1892.2       | 4.09%                                |
|         | CLOCK(bHLH)/Liver-Clock-ChIP-Seq(GSE39860)/Homer                | 1.00E-03  | -8.03244    | 328          | 11.44%       | 4395.5       | 9.51%                                |
|         | BMAL1(bHLH)/Liver-Bmal1-ChIP-Seq(GSE39860)/Homer                | 1.00E-03  | -7.670583   | 875          | 30.53%       | 12811.4      | 27.72%                               |
|         | BIM2(bHLH)/col-BIM2-DAP-Seq(GSE60143)/Homer                     | 1.00E-03  | -7.04056    | 419          | 14.62%       | 5834.6       | 12.62%                               |
|         | PIF5ox(bHLH)/Arabidopsis-PIF5ox-ChIP-Seq(GSE35062)/Homer        | 1.00E-03  | -8.30089    | 561          | 19.57%       | 7888.7       | 17.07%                               |
|         | At4g36780(BZR)/col-At4g36780-DAP-Seq(GSE60143)/Homer            | 1.00E-02  | -6.279845   | 188          | 6.56%        | 2446.9       | 5.29%                                |
|         | At1g78700(BZR)/col-At1g78700-DAP-Seq(GSE60143)/Homer            | 1.00E-02  | -6.098334   | 195          | 6.80%        | 2559.5       | 5.54%                                |
|         | bHLH34(bHLH)/colamp-bHLH34-DAP-Seq(GSE60143)/Homer              | 1.00E-02  | -6.370904   | 177          | 6.18%        | 2281.8       | 4.94%                                |
|         | n-Myc(bHLH)/mES-nMyc-ChIP-Seq(GSE11431)/Homer                   | 1.00E-02  | -6.019482   | 464          | 16.19%       | 6610.4       | 14.30%                               |
|         | c-Myc(bHLH)/mES-cMyc-ChIP-Seq(GSE11431)/Homer                   | 1.00E-02  | -5.328068   | 352          | 12.28%       | 4965.5       | 10.74%                               |
|         | NPAS(bHLH)/Liver-NPAS-ChIP-Seq(GSE39860)/Homer                  | 1.00E-02  | -4.668028   | 751          | 26.20%       | 11227        | 24.29%                               |
|         | USF1(bHLH)/GM12878-Usf1-ChIP-Seq(GSE32465)/Homer                | 1.00E-02  | -6.527372   | 284          | 9.91%        | 3845.1       | 8.32%                                |
|         | PIF4(bHLH)/Seedling-PIF4-ChIP-Seq(GSE35315)/Homer               | 1.00E-02  | -5.593947   | 632          | 22.05%       | 9249.8       | 20.01%                               |
| 8       | Twist(bHLH)/HMLE-TWIST1-ChIP-Seq(Chang_et_al)/Homer             | 1.00E-16  | -38.436889  | 182          | 6.35%        | 1485         | 3.21%                                |
| 9       | PRDM9(Zf)/Testis-DMC1-ChIP-Seq(GSE35498)/Homer                  | 1.00E-12  | -28.905794  | 353          | 12.32%       | 3855.2       | 8.34%                                |
| 10      | Tbx5(T-box)/HL1-Tbx5.biotin-ChIP-Seq(GSE21529)/Homer            | 1.00E-12  | -29.742108  | 1654         | 57.71%       | 23510.6      | 50.87%                               |
|         | Tbx21(T-box)/GM12878-TBX21-ChIP-Seq(Chang_et_al)/Homer          | 1.00E-10  | -24.215784  | 448          | 15.63%       | 5330.7       | 11.53%                               |
|         | Tbet(T-box)/CD8-Tbet-ChIP-Seq(GSE33802)/Homer                   | 1.00E-08  | -19.911369  | 459          | 16.02%       | 5668.8       | 12.27%                               |
|         | Tbx6(T-box)/ESC-Tbx6-ChIP-Seq(GSE93524)/Homer                   | 1.00E-07  | -16.335892  | 564          | 19.68%       | 7383.4       | 15.98%                               |
|         | Eomes(T-box)/H9-Eomes-ChIP-Seq(GSE26097)/Homer                  | 1.00E-07  | -18.243601  | 822          | 28.68%       | 11146.4      | 24.12%                               |
|         | Tbr1(T-box)/Cortex-Tbr1-ChIP-Seq(GSE71384)/Homer                | 1.00E-02  | -6.563408   | 487          | 16.99%       | 6911.3       | 14.95%                               |
| 11      | Zic3(Zf)/mES-Zic3-ChIP-Seq(GSE37889)/Homer                      | 1.00E-11  | -25.404436  | 685          | 23.90%       | 8701.2       | 18.83%                               |
|         | Unknown-ESC-element(?) /mES-Nanog-ChIP-Seq(GSE11724)/Homer      | 1.00E-09  | -22.074411  | 581          | 20.27%       | 7335.9       | 15.87%                               |

|    |                                                                |          |            |      |        |         |        |
|----|----------------------------------------------------------------|----------|------------|------|--------|---------|--------|
|    | Zic(Zf)/Cerebellum-ZIC1.2-ChIP-Seq(GSE60731)/Homer             | 1.00E-05 | -11.599255 | 633  | 22.09% | 8724.6  | 18.88% |
| 12 | bHLH130(bHLH)/col-bHLH130-DAP-Seq(GSE60143)/Homer              | 1.00E-10 | -23.477857 | 333  | 11.62% | 3758.7  | 8.13%  |
|    | bHLH122(bHLH)/col100-bHLH122-DAP-Seq(GSE60143)/Homer           | 1.00E-08 | -19.055288 | 366  | 12.77% | 4381.5  | 9.48%  |
|    | bHLH80(bHLH)/col-bHLH80-DAP-Seq(GSE60143)/Homer                | 1.00E-05 | -12.234659 | 417  | 14.55% | 5448.2  | 11.79% |
| 13 | NPAS2(bHLH)/Liver-NPAS2-ChIP-Seq(GSE39860)/Homer               | 1.00E-10 | -24.589843 | 714  | 24.91% | 9169.8  | 19.84% |
|    | MITF(bHLH)/MastCells-MITF-ChIP-Seq(GSE48085)/Homer             | 1.00E-02 | -5.95607   | 430  | 15.00% | 6096.7  | 13.19% |
|    | Usf2(bHLH)/C2C12-Usf2-ChIP-Seq(GSE36030)/Homer                 | 1.00E-02 | -5.138752  | 159  | 5.55%  | 2091.9  | 4.53%  |
| 14 | Six2(Homeobox)/NephronProgenitor-Six2-ChIP-Seq(GSE39837)/Homer | 1.00E-08 | -19.450308 | 333  | 11.62% | 3903    | 8.45%  |
|    | Six1(Homeobox)/Myoblast-Six1-ChIP-Seq(GSE20150)/Homer          | 1.00E-06 | -15.547844 | 97   | 3.38%  | 891.4   | 1.93%  |
|    | Six4(Homeobox)/MCF7-SIX4-ChIP-Seq(Encode)/Homer                | 1.00E-03 | -7.854204  | 28   | 0.98%  | 219.3   | 0.47%  |
| 15 | ATY13(MYB)/col-ATY13-DAP-Seq(GSE60143)/Homer                   | 1.00E-08 | -20.140357 | 1272 | 44.38% | 18001   | 38.95% |
|    | MYB(HTH)/ERMYB-Myb-ChIP-Seq(GSE22095)/Homer                    | 1.00E-04 | -9.288152  | 696  | 24.28% | 9873.6  | 21.36% |
|    | MYB77(MYB)/col-MYB77-DAP-Seq(GSE60143)/Homer                   | 1.00E-03 | -7.758513  | 470  | 16.40% | 6548.6  | 14.17% |
|    | AMYB(HTH)/Testes-AMYB-ChIP-Seq(GSE44588)/Homer                 | 1.00E-03 | -7.670032  | 601  | 20.97% | 8557.4  | 18.52% |
|    | BMYP(HTH)/Hela-BMYP-ChIP-Seq(GSE27030)/Homer                   | 1.00E-02 | -5.702459  | 531  | 18.53% | 7672.6  | 16.60% |
| 16 | ZBTB18(Zf)/HEK293-ZBTB18-GFP-ChIP-Seq(GSE58341)/Homer          | 1.00E-08 | -18.622602 | 367  | 12.81% | 4413.9  | 9.55%  |
|    | Tal1                                                           | 1.00E-05 | -13.006529 | 748  | 26.10% | 10373.9 | 22.45% |
| 17 | ETV4(ETS)/HepG2-ETV4-ChIP-Seq(ENCODE)/Homer                    | 1.00E-08 | -20.416359 | 681  | 23.76% | 8895.1  | 19.25% |
|    | GABPA(ETS)/Jurkat-GABPa-ChIP-Seq(GSE17954)/Homer               | 1.00E-07 | -16.890655 | 491  | 17.13% | 6278.5  | 13.59% |
|    | EWS:ERG-fusion(ETS)/CAD0_ES1-EWS:ERG-ChIP-Seq(SRA014231),      | 1.00E-07 | -18.02438  | 329  | 11.48% | 3903.6  | 8.45%  |
|    | Elk1(ETS)/Hela-Elk1-ChIP-Seq(GSE31477)/Homer                   | 1.00E-06 | -14.173838 | 328  | 11.44% | 4055.8  | 8.78%  |
|    | Flt1(ETS)/CD8-Flt1-ChIP-Seq(GSE20898)/Homer                    | 1.00E-06 | -16.030952 | 599  | 20.90% | 7921.6  | 17.14% |
|    | Elf4(ETS)/BMDM-Elf4-ChIP-Seq(GSE88699)/Homer                   | 1.00E-06 | -14.924759 | 520  | 18.14% | 6812.4  | 14.74% |
|    | EHF(ETS)/LoVo-EHF-ChIP-Seq(GSE49402)/Homer                     | 1.00E-06 | -15.510104 | 600  | 20.94% | 7967.8  | 17.24% |
|    | ELF1(ETS)/Jurkat-ELF1-ChIP-Seq(SRA014231)/Homer                | 1.00E-05 | -12.426327 | 310  | 10.82% | 3881.9  | 8.40%  |
|    | ETV1(ETS)/GIST48-ETV1-ChIP-Seq(GSE22441)/Homer                 | 1.00E-05 | -13.205242 | 712  | 24.84% | 9810    | 21.23% |
|    | EWS:FLI1-fusion(ETS)/SK_N_MC-EWS:FLI1-ChIP-Seq(SRA014231)/     | 1.00E-05 | -13.135124 | 311  | 10.85% | 3861.9  | 8.36%  |
|    | SPDEF(ETS)/VCaP-SPDEF-ChIP-Seq(SRA014231)/Homer                | 1.00E-05 | -12.899109 | 532  | 18.56% | 7113    | 15.39% |
|    | ELF5(ETS)/T47D-ELF5-ChIP-Seq(GSE30407)/Homer                   | 1.00E-05 | -13.090896 | 341  | 11.90% | 4294.2  | 9.29%  |
|    | ELF3(ETS)/PDAC-ELF3-ChIP-Seq(GSE64557)/Homer                   | 1.00E-05 | -12.602727 | 337  | 11.76% | 4261.5  | 9.22%  |
|    | Elk4(ETS)/Hela-Elk4-ChIP-Seq(GSE31477)/Homer                   | 1.00E-03 | -9.125533  | 307  | 10.71% | 4016.5  | 8.69%  |
|    | ETS(ETS)/Promoter/Homer                                        | 1.00E-03 | -8.137307  | 177  | 6.18%  | 2190    | 4.74%  |
|    | Ets1-distal(ETS)/CD4+-PollI-ChIP-Seq(Barski_et_al.)/Homer      | 1.00E-03 | -8.11849   | 149  | 5.20%  | 1796.9  | 3.89%  |
| 18 | RBPl:Ebox(?,bHLH)/Panc1-Rbpj1-ChIP-Seq(GSE47459)/Homer         | 1.00E-07 | -17.503461 | 274  | 9.56%  | 3159.3  | 6.84%  |
| 19 | LBD23(LOBAS2)/colamp-LBD23-DAP-Seq(GSE60143)/Homer             | 1.00E-07 | -16.124616 | 422  | 14.72% | 5313.1  | 11.50% |
| 20 | AP-2alpha(AP2)/Hela-AP2alpha-ChIP-Seq(GSE31477)/Homer          | 1.00E-07 | -18.150437 | 827  | 28.86% | 11228.1 | 24.30% |
|    | AP-2gamma(AP2)/MCF7-TFAP2C-ChIP-Seq(GSE21234)/Homer            | 1.00E-05 | -11.984025 | 975  | 34.02% | 13964.7 | 30.22% |
| 21 | THRa(NR)/HepG2-THRa.Flag-ChIP-Seq(Encode)/Homer                | 1.00E-07 | -18.418654 | 502  | 17.52% | 6361.9  | 13.77% |
|    | THRa(NR)/C17.2-THRa-ChIP-Seq(GSE38347)/Homer                   | 1.00E-03 | -9.019915  | 305  | 10.64% | 3993.5  | 8.64%  |
| 22 | ERF38(AP2EREBP)/col-ERF38-DAP-Seq(GSE60143)/Homer              | 1.00E-07 | -16.920344 | 210  | 7.33%  | 2309.7  | 5.00%  |
|    | DREB19(AP2EREBP)/colamp-DREB19-DAP-Seq(GSE60143)/Homer         | 1.00E-06 | -15.331605 | 221  | 7.71%  | 2511.6  | 5.43%  |
|    | AT3G16280(AP2EREBP)/colamp-AT3G16280-DAP-Seq(GSE60143)/        | 1.00E-06 | -14.284725 | 143  | 4.99%  | 1502.2  | 3.25%  |
|    | DEAR3(AP2EREBP)/colamp-DEAR3-DAP-Seq(GSE60143)/Homer           | 1.00E-06 | -15.116694 | 143  | 4.99%  | 1479.4  | 3.20%  |
|    | At5g65130(AP2EREBP)/colamp-At5g65130-DAP-Seq(GSE60143)/H       | 1.00E-05 | -11.985054 | 127  | 4.43%  | 1359.3  | 2.94%  |
|    | At1g36060(AP2EREBP)/colamp-At1g36060-DAP-Seq(GSE60143)/H       | 1.00E-05 | -13.606449 | 282  | 9.84%  | 3428    | 7.42%  |
|    | DEAR5(AP2EREBP)/col-DEAR5-DAP-Seq(GSE60143)/Homer              | 1.00E-05 | -12.575618 | 81   | 2.83%  | 758.1   | 1.64%  |
|    | DEAR2(AP2EREBP)/colamp-DEAR2-DAP-Seq(GSE60143)/Homer           | 1.00E-05 | -12.987822 | 426  | 14.86% | 5537.5  | 11.98% |
|    | CEJ1(AP2EREBP)/col-CEJ1-DAP-Seq(GSE60143)/Homer                | 1.00E-05 | -12.19864  | 392  | 13.68% | 5084    | 11.00% |
|    | At1g19210(AP2EREBP)/colamp-At1g19210-DAP-Seq(GSE60143)/H       | 1.00E-04 | -10.616848 | 569  | 19.85% | 7826.3  | 16.93% |
|    | bHLH10(bHLH)/colamp-bHLH10-DAP-Seq(GSE60143)/Homer             | 1.00E-04 | -9.323019  | 119  | 4.15%  | 1337.7  | 2.89%  |
|    | TINY(AP2EREBP)/col-TINY-DAP-Seq(GSE60143)/Homer                | 1.00E-04 | -9.82057   | 109  | 3.80%  | 1187.1  | 2.57%  |
|    | At2g44940(AP2EREBP)/colamp-At2g44940-DAP-Seq(GSE60143)/H       | 1.00E-04 | -10.785113 | 91   | 3.18%  | 925.1   | 2.00%  |
|    | AT1G01250(AP2EREBP)/col-AT1G01250-DAP-Seq(GSE60143)/Hom        | 1.00E-04 | -11.116201 | 50   | 1.74%  | 417.8   | 0.90%  |
|    | AT1G71450(AP2EREBP)/col-AT1G71450-DAP-Seq(GSE60143)/Hom        | 1.00E-04 | -10.59095  | 644  | 22.47% | 8968.5  | 19.41% |
|    | At4g31060(AP2EREBP)/colamp-At4g31060-DAP-Seq(GSE60143)/H       | 1.00E-04 | -11.334477 | 158  | 5.51%  | 1795.4  | 3.88%  |
|    | At4g28140(AP2EREBP)/colamp-At4g28140-DAP-Seq(GSE60143)/H       | 1.00E-03 | -6.981325  | 146  | 5.09%  | 1805.3  | 3.91%  |
|    | DREB2(AP2EREBP)/col-DREB2-DAP-Seq(GSE60143)/Homer              | 1.00E-03 | -8.453546  | 167  | 5.83%  | 2034.9  | 4.40%  |
|    | At4g32800(AP2EREBP)/colamp-At4g32800-DAP-Seq(GSE60143)/H       | 1.00E-03 | -8.89996   | 48   | 1.67%  | 433.9   | 0.94%  |
|    | RAP21(AP2EREBP)/colamp-RAP21-DAP-Seq(GSE60143)/Homer           | 1.00E-03 | -9.160037  | 77   | 2.69%  | 788.5   | 1.71%  |
|    | At1g22810(AP2EREBP)/colamp-At1g22810-DAP-Seq(GSE60143)/H       | 1.00E-03 | -7.700125  | 180  | 6.28%  | 2254.7  | 4.88%  |
|    | At1g77640(AP2EREBP)/col-At1g77640-DAP-Seq(GSE60143)/Home       | 1.00E-03 | -8.347334  | 106  | 3.70%  | 1195.9  | 2.59%  |
|    | DREB26(AP2EREBP)/col-DREB26-DAP-Seq(GSE60143)/Homer            | 1.00E-03 | -8.079812  | 131  | 4.57%  | 1547.8  | 3.35%  |
|    | At1g75490(AP2EREBP)/colamp-At1g75490-DAP-Seq(GSE60143)/H       | 1.00E-02 | -4.730595  | 703  | 24.53% | 10464.4 | 22.64% |
|    | AT1G44830(AP2EREBP)/col-AT1G44830-DAP-Seq(GSE60143)/Hom        | 1.00E-02 | -5.099287  | 163  | 5.69%  | 2152.9  | 4.66%  |
| 23 | Fra2(bZIP)/Striatum-Fra2-ChIP-Seq(GSE43429)/Homer              | 1.00E-07 | -17.324481 | 200  | 6.98%  | 2163.1  | 4.68%  |
|    | Fos12(bZIP)/3T3L1-Fos12-ChIP-Seq(GSE56872)/Homer               | 1.00E-07 | -16.945577 | 155  | 5.41%  | 1585.2  | 3.43%  |
|    | Jun-AP1(bZIP)/K562-cJun-ChIP-Seq(GSE31477)/Homer               | 1.00E-07 | -16.926172 | 119  | 4.15%  | 1131.1  | 2.45%  |
|    | Atf3(bZIP)/GBM-ATF3-ChIP-Seq(GSE33912)/Homer                   | 1.00E-07 | -16.498993 | 246  | 8.58%  | 2811.4  | 6.08%  |
|    | Fra1(bZIP)/BT549-Fra1-ChIP-Seq(GSE46166)/Homer                 | 1.00E-07 | -16.777256 | 211  | 7.36%  | 2327.8  | 5.04%  |
|    | AP-1(bZIP)/ThioMac-PU.1-ChIP-Seq(GSE21512)/Homer               | 1.00E-06 | -16.02629  | 283  | 9.87%  | 3340.2  | 7.23%  |
|    | JunB(bZIP)/DendriticCells-JunB-ChIP-Seq(GSE36099)/Homer        | 1.00E-06 | -16.104021 | 215  | 7.50%  | 2403.5  | 5.20%  |
|    | BATF(bZIP)/Th17-BATF-ChIP-Seq(GSE39756)/Homer                  | 1.00E-06 | -15.863378 | 239  | 8.34%  | 2738.5  | 5.93%  |
|    | Bach2(bZIP)/OCLY7-Bach2-ChIP-Seq(GSE44420)/Homer               | 1.00E-03 | -8.221192  | 99   | 3.45%  | 1105.6  | 2.39%  |
|    | NFE2L2(bZIP)/HepG2-NFE2L2-ChIP-Seq(Encode)/Homer               | 1.00E-02 | -4.765266  | 21   | 0.73%  | 189     | 0.41%  |
|    | NF-E2(bZIP)/K562-NFE2-ChIP-Seq(GSE31477)/Homer                 | 1.00E-02 | -4.699396  | 32   | 1.12%  | 326.2   | 0.71%  |
| 24 | At5g05790(MYBrelated)/col-At5g05790-DAP-Seq(GSE60143)/Hom      | 1.00E-07 | -17.814649 | 269  | 9.39%  | 3079.8  | 6.66%  |
|    | At3g11280(MYBrelated)/col-At3g11280-DAP-Seq(GSE60143)/Hom      | 1.00E-07 | -17.771248 | 258  | 9.00%  | 2930.6  | 6.34%  |
|    | Gata4(Zf)/Heart-Gata4-ChIP-Seq(GSE35151)/Homer                 | 1.00E-06 | -14.895189 | 299  | 10.43% | 3611.9  | 7.82%  |
|    | GATA3(Zf)/iTreg-Gata3-ChIP-Seq(GSE20898)/Homer                 | 1.00E-05 | -11.54036  | 402  | 14.03% | 5268.5  | 11.40% |
|    | Gata6(Zf)/HUg1N-GATA6-ChIP-Seq(GSE51936)/Homer                 | 1.00E-05 | -12.100115 | 260  | 9.07%  | 3183.7  | 6.89%  |
|    | Gata1(Zf)/K562-GATA1-ChIP-Seq(GSE18829)/Homer                  | 1.00E-04 | -10.885448 | 183  | 6.39%  | 2155.9  | 4.66%  |
|    | Gata2(Zf)/K562-GATA2-ChIP-Seq(GSE18829)/Homer                  | 1.00E-04 | -10.755419 | 200  | 6.98%  | 2398    | 5.19%  |
|    | At5g58900(MYBrelated)/colamp-At5g58900-DAP-Seq(GSE60143)/      | 1.00E-03 | -8.780241  | 310  | 10.82% | 4081.6  | 8.83%  |
|    | At5g08520(MYBrelated)/colamp-At5g08520-DAP-Seq(GSE60143)/      | 1.00E-03 | -7.637353  | 297  | 10.36% | 3962.3  | 8.57%  |
|    | ELT-3(Gata)/cElegans-L1-ELT3-ChIP-Seq(modEncode)/Homer         | 1.00E-03 | -8.974191  | 106  | 3.70%  | 1174.8  | 2.54%  |
|    | PQM-1(?)/cElegans-L3-ChIP-Seq(modEncode)/Homer                 | 1.00E-03 | -8.311567  | 99   | 3.45%  | 1102.4  | 2.39%  |
|    | At1g49010(MYBrelated)/col-At1g49010-DAP-Seq(GSE60143)/Hom      | 1.00E-02 | -6.778489  | 471  | 16.43% | 6647.9  | 14.38% |

|    |                                                                |          |            |      |        |         |        |
|----|----------------------------------------------------------------|----------|------------|------|--------|---------|--------|
| 25 | PABPC1(?)/MEL-PABC1-CLIP-Seq(GSE69755)/Homer                   | 1.00E-07 | -17.298293 | 421  | 14.69% | 5242.4  | 11.34% |
|    | Hoxa11(Homeobox)/ChickenMSG-Hoxa11.Flag-ChIP-Seq(GSE86088)     | 1.00E-05 | -12.301896 | 609  | 21.25% | 8310.3  | 17.98% |
|    | HOXD13(Homeobox)/Chicken-Hoxd13-ChIP-Seq(GSE38910)/Homer       | 1.00E-05 | -12.589196 | 249  | 8.69%  | 3006.7  | 6.51%  |
|    | caudal(Homeobox)/Drosophila-Embryos-ChIP-Chip(modEncode)/Homer | 1.00E-04 | -9.51921   | 197  | 6.87%  | 2409.5  | 5.21%  |
|    | CDX4(Homeobox)/ZebrafishEmbryos-Cdx4.Myc-ChIP-Seq(GSE48254)    | 1.00E-04 | -9.38867   | 217  | 7.57%  | 2699.5  | 5.84%  |
|    | Hoxa13(Homeobox)/ChickenMSG-Hoxa13.Flag-ChIP-Seq(GSE86088)     | 1.00E-04 | -9.85432   | 623  | 21.74% | 8706.7  | 18.84% |
|    | Hoxd13(Homeobox)/ChickenMSG-Hoxd13.Flag-ChIP-Seq(GSE86088)     | 1.00E-04 | -11.116081 | 392  | 13.68% | 5146.8  | 11.14% |
|    | Cdx2(Homeobox)/mES-Cdx2-ChIP-Seq(GSE14586)/Homer               | 1.00E-03 | -8.536871  | 155  | 5.41%  | 1862.9  | 4.03%  |
|    | Hoxd11(Homeobox)/ChickenMSG-Hoxd11.Flag-ChIP-Seq(GSE86088)     | 1.00E-03 | -7.27757   | 646  | 22.54% | 9288.6  | 20.10% |
|    | Unknown(Homeobox)/Limb-p300-ChIP-Seq/Homer                     | 1.00E-03 | -9.024533  | 166  | 5.79%  | 1995.1  | 4.32%  |
|    | HOXB13(Homeobox)/ProstateTumor-HOXB13-ChIP-Seq(GSE56288)       | 1.00E-03 | -6.925214  | 256  | 8.93%  | 3403.7  | 7.36%  |
| 26 | ETS:E-box(ETS,bHLH)/HPC7-Sci-ChIP-Seq(GSE22178)/Homer          | 1.00E-06 | -14.445709 | 78   | 2.72%  | 685.9   | 1.48%  |
| 27 | WIP5(C2H2)/colamp-WIP5-DAP-Seq(GSE60143)/Homer                 | 1.00E-06 | -14.074626 | 628  | 21.91% | 8477.1  | 18.34% |
| 28 | AT1G77200(AP2EREBP)/colamp-AT1G77200-DAP-Seq(GSE60143)/Homer   | 1.00E-06 | -13.940708 | 294  | 10.26% | 3582.8  | 7.75%  |
|    | At4g16750(AP2EREBP)/col-At4g16750-DAP-Seq(GSE60143)/Homer      | 1.00E-05 | -13.419007 | 280  | 9.77%  | 3407.6  | 7.37%  |
|    | CBF2(AP2EREBP)/colamp-CBF2-DAP-Seq(GSE60143)/Homer             | 1.00E-05 | -13.782841 | 187  | 6.52%  | 2103.1  | 4.55%  |
|    | CBF4(AP2EREBP)/colamp-CBF4-DAP-Seq(GSE60143)/Homer             | 1.00E-05 | -12.060083 | 261  | 9.11%  | 3199.8  | 6.92%  |
|    | AT1G12630(AP2EREBP)/colamp-AT1G12630-DAP-Seq(GSE60143)/Homer   | 1.00E-04 | -9.537946  | 203  | 7.08%  | 2493.5  | 5.40%  |
|    | AT3G60490(AP2EREBP)/colamp-AT3G60490-DAP-Seq(GSE60143)/Homer   | 1.00E-04 | -9.26546   | 117  | 4.08%  | 1312.4  | 2.84%  |
|    | CBF3(AP2EREBP)/colamp-CBF3-DAP-Seq(GSE60143)/Homer             | 1.00E-04 | -10.584085 | 184  | 6.42%  | 2181.8  | 4.72%  |
|    | CBF1(AP2EREBP)/colamp-CBF1-DAP-Seq(GSE60143)/Homer             | 1.00E-04 | -10.490133 | 264  | 9.21%  | 3317.9  | 7.18%  |
|    | ARF2(ARF)/col-ARF2-DAP-Seq(GSE60143)/Homer                     | 1.00E-03 | -8.841271  | 1204 | 42.01% | 17876.9 | 38.68% |
|    | Rap210(AP2EREBP)/col-Rap210-DAP-Seq(GSE60143)/Homer            | 1.00E-03 | -8.067718  | 223  | 7.78%  | 2853.8  | 6.18%  |
|    | DDF1(AP2EREBP)/col-DDF1-DAP-Seq(GSE60143)/Homer                | 1.00E-02 | -6.505827  | 142  | 4.95%  | 1771.3  | 3.83%  |
| 29 | Lhx1(Homeobox)/EmbryoCarcinoma-Lhx1-ChIP-Seq(GSE70957)/Homer   | 1.00E-06 | -15.165519 | 292  | 10.19% | 3501.5  | 7.58%  |
|    | Lhx2(Homeobox)/HFSC-Lhx2-ChIP-Seq(GSE48068)/Homer              | 1.00E-05 | -11.859887 | 277  | 9.67%  | 3436.2  | 7.44%  |
|    | Dlx3(Homeobox)/Keratinocytes-Dlx3-ChIP-Seq(GSE89884)/Homer     | 1.00E-04 | -10.597757 | 164  | 5.72%  | 1904.6  | 4.12%  |
|    | Lhx3(Homeobox)/Neuron-Lhx3-ChIP-Seq(GSE31456)/Homer            | 1.00E-04 | -11.006582 | 407  | 14.20% | 5374.8  | 11.63% |
|    | ATHB23(ZFHD)/col-ATHB23-DAP-Seq(GSE60143)/Homer                | 1.00E-03 | -7.503401  | 206  | 7.19%  | 2638.8  | 5.71%  |
|    | ATHB33(ZFHD)/col-ATHB33-DAP-Seq(GSE60143)/Homer                | 1.00E-03 | -8.36909   | 305  | 10.64% | 4033.9  | 8.73%  |
|    | ATHB25(ZFHD)/colamp-ATHB25-DAP-Seq(GSE60143)/Homer             | 1.00E-03 | -7.964917  | 255  | 8.90%  | 3324.8  | 7.19%  |
|    | AT1G20910(ARID)/col-AT1G20910-DAP-Seq(GSE60143)/Homer          | 1.00E-02 | -4.888764  | 301  | 10.50% | 4230.8  | 9.15%  |
|    | ATHB24(ZFHD)/colamp-ATHB24-DAP-Seq(GSE60143)/Homer             | 1.00E-02 | -4.987669  | 163  | 5.69%  | 2159.9  | 4.67%  |
| 30 | PAX5(Paired,Homeobox)/GM12878-PAX5-ChIP-Seq(GSE32465)/Homer    | 1.00E-06 | -14.160838 | 292  | 10.19% | 3544.1  | 7.67%  |
|    | Pax8(Paired,Homeobox)/Thyroid-Pax8-ChIP-Seq(GSE26938)/Homer    | 1.00E-04 | -11.179776 | 300  | 10.47% | 3800.1  | 8.22%  |
|    | PAX6(Paired,Homeobox)/Forebrain-Pax6-ChIP-Seq(GSE66961)/Homer  | 1.00E-03 | -8.065582  | 49   | 1.71%  | 462.6   | 1.00%  |

NEUROD1\_only

| Cluster                                        | Name                                               | PValue                                           | log(PValue) | # Target Seq | % of Targets | # Background Sequences with Motif | % of Background Sequences with Motif |        |
|------------------------------------------------|----------------------------------------------------|--------------------------------------------------|-------------|--------------|--------------|-----------------------------------|--------------------------------------|--------|
| 1                                              | NeuroD1(bHLH)/Islet-NeuroD1-ChIP-Seq(GSE30298)/Ht  | 1.00E-241                                        | -555.32544  | 1454         | 35.27%       | 6562.9                            | 14.48%                               |        |
|                                                | NeuroG2(bHLH)/Fibroblast-NeuroG2-ChIP-Seq(GSE759)  | 1.00E-226                                        | -520.63902  | 2025         | 49.11%       | 11656.8                           | 25.71%                               |        |
|                                                | Atoh1(bHLH)/Cerebellum-Atoh1-ChIP-Seq(GSE22111)/I  | 1.00E-221                                        | -510.10459  | 1699         | 41.21%       | 8866.5                            | 19.56%                               |        |
|                                                | Olig2(bHLH)/Neuron-Olig2-ChIP-Seq(GSE30882)/Home   | 1.00E-203                                        | -468.45069  | 2150         | 52.15%       | 13330.9                           | 29.41%                               |        |
|                                                | TCF4(bHLH)/SHSY5Y-TCF4-ChIP-Seq(GSE96915)/Homer    | 1.00E-198                                        | -456.32015  | 1975         | 47.90%       | 11792.3                           | 26.01%                               |        |
|                                                | Ascl1(bHLH)/NeuralTubes-Ascl1-ChIP-Seq(GSE5840)/I  | 1.00E-84                                         | -194.48572  | 1803         | 43.73%       | 13306.7                           | 29.35%                               |        |
|                                                | Tcf21(bHLH)/ArterySmoothMuscle-Tcf21-ChIP-Seq(GSE  | 1.00E-70                                         | -161.73437  | 1165         | 28.26%       | 7743.1                            | 17.08%                               |        |
|                                                | Ptf1a(bHLH)/Panc1-Ptf1a-ChIP-Seq(GSE47459)/Homer   | 1.00E-54                                         | -124.67987  | 2365         | 57.36%       | 20515.1                           | 45.26%                               |        |
|                                                | HLH1(bHLH)/cElegans-Embryo-HLH1-ChIP-Seq(modEnc    | 1.00E-51                                         | -118.6611   | 830          | 20.13%       | 5368                              | 11.84%                               |        |
|                                                | SCL(bHLH)/HPC7-Sci-ChIP-Seq(GSE13511)/Homer        | 1.00E-44                                         | -102.76816  | 3176         | 77.03%       | 30383.7                           | 67.02%                               |        |
|                                                | Ap4(bHLH)/AML-Tfap4-ChIP-Seq(GSE45738)/Homer       | 1.00E-33                                         | -76.949565  | 1225         | 29.71%       | 9800.5                            | 21.62%                               |        |
|                                                | bZIP52(bZIP)/colamp-bZIP52-DAP-Seq(GSE60143)/Hon   | 1.00E-30                                         | -69.088147  | 1115         | 27.04%       | 8904.7                            | 19.64%                               |        |
|                                                | MyoD(bHLH)/Myotube-MyoD-ChIP-Seq(GSE21614)/Hor     | 1.00E-30                                         | -70.155116  | 866          | 21.00%       | 6497                              | 14.33%                               |        |
|                                                | HEB(bHLH)/mES-Heb-ChIP-Seq(GSE53233)/Homer         | 1.00E-30                                         | -69.996974  | 1807         | 43.83%       | 15911.9                           | 35.10%                               |        |
|                                                | Myf5(bHLH)/GM-Myf5-ChIP-Seq(GSE24852)/Homer        | 1.00E-30                                         | -71.127259  | 779          | 18.89%       | 5669.7                            | 12.51%                               |        |
|                                                | E-box/Drosophila-Promoters/Homer                   | 1.00E-28                                         | -64.966834  | 308          | 7.47%        | 1700.6                            | 3.75%                                |        |
|                                                | Tcf12(bHLH)/GM12878-Tcf12-ChIP-Seq(GSE32465)/Ho    | 1.00E-24                                         | -55.393601  | 1020         | 24.74%       | 8308.3                            | 18.33%                               |        |
|                                                | VIP1(bZIP)/col-VIP1-DAP-Seq(GSE60143)/Homer        | 1.00E-22                                         | -52.193511  | 227          | 5.51%        | 1209.1                            | 2.67%                                |        |
|                                                | MyoG(bHLH)/C2C12-MyoG-ChIP-Seq(GSE36024)/Home      | 1.00E-22                                         | -51.988683  | 1052         | 25.52%       | 8712.1                            | 19.22%                               |        |
|                                                | bZIP69(bZIP)/col-bZIP69-DAP-Seq(GSE60143)/Homer    | 1.00E-18                                         | -43.295141  | 155          | 3.76%        | 758.2                             | 1.67%                                |        |
|                                                | bZIP18(bZIP)/colamp-bZIP18-DAP-Seq(GSE60143)/Hon   | 1.00E-13                                         | -29.995793  | 3077         | 74.63%       | 31473                             | 69.43%                               |        |
|                                                | E2A(bHLH)/proBcell-E2A-ChIP-Seq(GSE21978)/Homer    | 1.00E-05                                         | -13.579367  | 1278         | 31.00%       | 12543.4                           | 27.67%                               |        |
|                                                | 2                                                  | Tal1                                             | 1.00E-147   | -339.78158   | 1702         | 41.28%                            | 10462.8                              | 23.08% |
|                                                |                                                    | ZBTB18(Zf)/HEK293-ZBTB18.GFP-ChIP-Seq(GSE58341)  | 1.00E-28    | -65.628803   | 553          | 13.41%                            | 3732.5                               | 8.23%  |
|                                                | 3                                                  | EBF2(EBF)/BrownAdipose-EBF2-ChIP-Seq(GSE97114)/I | 1.00E-137   | -316.20732   | 1311         | 31.80%                            | 7273.6                               | 16.05% |
| EBF(EBF)/proBcell-EBF-ChIP-Seq(GSE21978)/Homer |                                                    | 1.00E-84                                         | -193.59918  | 448          | 10.87%       | 1724.4                            | 3.80%                                |        |
| 4                                              | EBF1(EBF)/Near-E2A-ChIP-Seq(GSE21512)/Homer        | 1.00E-64                                         | -148.68105  | 1314         | 31.87%       | 9310.9                            | 20.54%                               |        |
|                                                | CTCF(Zf)/CD4-CTCF-ChIP-Seq(Barski_et_al.)/Homer    | 1.00E-68                                         | -158.70777  | 252          | 6.11%        | 728.6                             | 1.61%                                |        |
| 5                                              | BORIS(Zf)/K562-CTCF-ChIP-Seq(GSE32465)/Homer       | 1.00E-50                                         | -116.2111   | 300          | 7.28%        | 1226.6                            | 2.71%                                |        |
|                                                | FOXA1(Forkhead)/LNCAP-FOXA1-ChIP-Seq(GSE27824)/    | 1.00E-60                                         | -140.27003  | 817          | 19.82%       | 4977.6                            | 10.98%                               |        |
| 6                                              | Foxa2(Forkhead)/Liver-Foxa2-ChIP-Seq(GSE25694)/Hor | 1.00E-59                                         | -136.36476  | 652          | 15.81%       | 3661.3                            | 8.08%                                |        |
|                                                | FOXA1(Forkhead)/MCF7-FOXA1-ChIP-Seq(GSE26831)/I    | 1.00E-53                                         | -122.2973   | 661          | 16.03%       | 3889.8                            | 8.58%                                |        |
|                                                | FOXM1(Forkhead)/MCF7-FOXM1-ChIP-Seq(GSE72977)/     | 1.00E-47                                         | -108.80088  | 696          | 16.88%       | 4347.3                            | 9.59%                                |        |
|                                                | FoxEbox(Forkhead,bHLH)/Panc1-Foxa2-ChIP-Seq(GSE4   | 1.00E-46                                         | -106.65503  | 836          | 20.28%       | 5593.4                            | 12.34%                               |        |
|                                                | PHA-4(Forkhead)/cElegans-Embryos-PHA4-ChIP-Seq(m   | 1.00E-45                                         | -104.18902  | 1886         | 45.74%       | 15864.4                           | 35.00%                               |        |
|                                                | Foxo3(Forkhead)/U2OS-Foxo3-ChIP-Seq(E-MTAB-2701    | 1.00E-43                                         | -100.31055  | 541          | 13.12%       | 3162.6                            | 6.98%                                |        |
|                                                | FoxL2(Forkhead)/Ovary-FoxL2-ChIP-Seq(GSE60858)/Ho  | 1.00E-38                                         | -89.336346  | 521          | 12.64%       | 3129.9                            | 6.90%                                |        |
|                                                | FOXK1(Forkhead)/HEK293-FOXK1-ChIP-Seq(GSE51673)/   | 1.00E-37                                         | -86.075014  | 686          | 16.64%       | 4580.5                            | 10.10%                               |        |
|                                                | FOXP1(Forkhead)/H9-FoxP1-ChIP-Seq(GSE31006)/Hon    | 1.00E-34                                         | -78.46124   | 327          | 7.93%        | 1710.5                            | 3.77%                                |        |
|                                                | Foxf1(Forkhead)/Lung-Foxf1-ChIP-Seq(GSE77951)/Hon  | 1.00E-31                                         | -73.10987   | 525          | 12.73%       | 3377.3                            | 7.45%                                |        |
|                                                | Foxo1(Forkhead)/RAW-Foxo1-ChIP-Seq(Fan_et_al.)/Hc  | 1.00E-30                                         | -69.367821  | 1306         | 31.68%       | 10785.8                           | 23.79%                               |        |
|                                                | Foxa3(Forkhead)/Liver-Foxa3-ChIP-Seq(GSE77670)/Hor | 1.00E-28                                         | -64.791362  | 248          | 6.02%        | 1247.5                            | 2.75%                                |        |
|                                                | FOXK2(Forkhead)/U2OS-FOXK2-ChIP-Seq(E-MTAB-220     | 1.00E-24                                         | -57.29597   | 459          | 11.13%       | 3045.2                            | 6.72%                                |        |
|                                                | Lhx2(Homeobox)/HFSC-Lhx2-ChIP-Seq(GSE48068)/Hor    | 1.00E-57                                         | -131.918    | 786          | 19.06%       | 4817.4                            | 10.63%                               |        |
|                                                | Lhx3(Homeobox)/Neuron-Lhx3-ChIP-Seq(GSE31456)/Ht   | 1.00E-53                                         | -122.12387  | 1082         | 26.24%       | 5756.5                            | 16.71%                               |        |
|                                                | Lhx1(Homeobox)/EmbryoCarcinoma-Lhx1-ChIP-Seq(GSI   | 1.00E-51                                         | -119.32726  | 781          | 18.94%       | 4935.4                            | 10.89%                               |        |
|                                                | Dlx3(Homeobox)/Keratinocytes-Dlx3-ChIP-Seq(GSE8988 | 1.00E-41                                         | -95.591584  | 478          | 11.59%       | 2708.2                            | 5.97%                                |        |
|                                                | ATHB34(ZFHD)/colamp-ATHB34-DAP-Seq(GSE60143)/I     | 1.00E-36                                         | -83.486513  | 536          | 13.00%       | 3328.1                            | 7.34%                                |        |
|                                                | ATHB23(ZFHD)/col-ATHB23-DAP-Seq(GSE60143)/Hom      | 1.00E-34                                         | -78.758165  | 578          | 14.02%       | 3750.6                            | 8.27%                                |        |
|                                                | ATHB24(ZFHD)/colamp-ATHB24-DAP-Seq(GSE60143)/I     | 1.00E-33                                         | -77.790294  | 490          | 11.88%       | 3018.1                            | 6.66%                                |        |
|                                                | ATHB33(ZFHD)/col-ATHB33-DAP-Seq(GSE60143)/Hom      | 1.00E-32                                         | -74.258916  | 784          | 19.02%       | 5657.9                            | 12.48%                               |        |
|                                                | ATHB25(ZFHD)/colamp-ATHB25-DAP-Seq(GSE60143)/I     | 1.00E-29                                         | -67.945125  | 680          | 16.49%       | 4824.1                            | 10.64%                               |        |
|                                                | AT1G20910(ARID)/col-AT1G20910-DAP-Seq(GSE60143)    | 1.00E-15                                         | -35.835304  | 748          | 18.14%       | 6175.6                            | 13.62%                               |        |
|                                                | Rfx2(HTH)/LoVo-RFX2-ChIP-Seq(GSE49402)/Homer       | 1.00E-43                                         | -99.404932  | 155          | 3.76%        | 441.2                             | 0.97%                                |        |
|                                                | RFX(HTH)/K562-RFX3-ChIP-Seq(SRA012198)/Homer       | 1.00E-40                                         | -93.763097  | 140          | 3.40%        | 384.5                             | 0.85%                                |        |
| Rfx1(HTH)/NPC-H3K4me1-ChIP-Seq(GSE16256)/Homer | 1.00E-34                                           | -79.541146                                       | 254         | 6.16%        | 1168.4       | 2.58%                             |                                      |        |
| X-box(HTH)/NPC-H3K4me1-ChIP-Seq(GSE16256)/Home | 1.00E-27                                           | -62.651155                                       | 150         | 3.64%        | 586.2        | 1.29%                             |                                      |        |
| 8                                              | NF1-halfsite(CTF)/LNCaP-NF1-ChIP-Seq(Unpublished)/ | 1.00E-43                                         | -99.736594  | 1635         | 39.66%       | 13380.7                           | 29.52%                               |        |
|                                                | HIC1(Zf)/Treg-ZBTB29-ChIP-Seq(GSE99889)/Homer      | 1.00E-24                                         | -55.383523  | 1762         | 42.74%       | 15879.8                           | 35.03%                               |        |
| 9                                              | Nkx6.1(Homeobox)/Islet-Nkx6.1-ChIP-Seq(GSE40975)/I | 1.00E-34                                         | -78.79963   | 1468         | 35.61%       | 12179.1                           | 26.87%                               |        |
|                                                | Isl1(Homeobox)/Neuron-Isl1-ChIP-Seq(GSE31456)/Hon  | 1.00E-28                                         | -64.796011  | 1174         | 28.47%       | 9587.3                            | 21.15%                               |        |
| 10                                             | Nanog(Homeobox)/mES-Nanog-ChIP-Seq(GSE11724)/I     | 1.00E-20                                         | -47.136237  | 2419         | 58.67%       | 23292.5                           | 51.38%                               |        |
|                                                | Barx1(Homeobox)/Stomach-Barx1.3xFlag-ChIP-Seq(GS   | 1.00E-11                                         | -25.443534  | 265          | 6.43%        | 1889.1                            | 4.17%                                |        |
| 11                                             | Rfx5(HTH)/GM12878-Rfx5-ChIP-Seq(GSE31477)/Home     | 1.00E-33                                         | -76.100089  | 317          | 7.69%        | 1657.1                            | 3.66%                                |        |
|                                                | Rfx6(HTH)/Min6b1-Rfx6.HA-ChIP-Seq(GSE62844)/Hom    | 1.00E-12                                         | -28.989236  | 831          | 20.16%       | 7206.1                            | 15.90%                               |        |
| 12                                             | NF1(CTF)/LNCAP-NF1-ChIP-Seq(Unpublished)/Homer     | 1.00E-27                                         | -62.220822  | 470          | 11.40%       | 3065.1                            | 6.76%                                |        |
|                                                | Tlx?(NR)/NPC-H3K4me1-ChIP-Seq(GSE16256)/Homer      | 1.00E-25                                         | -59.580901  | 512          | 12.42%       | 3470.6                            | 7.66%                                |        |
| 13                                             | p53(p53)/Saos-p53-ChIP-Seq(GSE15780)/Homer         | 1.00E-24                                         | -57.359961  | 129          | 3.13%        | 485.6                             | 1.07%                                |        |
|                                                | p53(p53)/Saos-p53-ChIP-Seq/Homer                   | 1.00E-24                                         | -57.359961  | 129          | 3.13%        | 485.6                             | 1.07%                                |        |
| 14                                             | p63(p53)/Keratinocyte-p63-ChIP-Seq(GSE17611)/Home  | 1.00E-19                                         | -44.162153  | 332          | 8.05%        | 2157.5                            | 4.76%                                |        |
|                                                | p73(p53)/Trachea-p73-ChIP-Seq(PRNA310161)/Home     | 1.00E-17                                         | -40.532607  | 80           | 1.94%        | 278.3                             | 0.61%                                |        |
| 15                                             | p53(p53)/mES-cMyc-ChIP-Seq(GSE11431)/Homer         | 1.00E-02                                         | -6.367366   | 23           | 0.56%        | 126.5                             | 0.28%                                |        |
|                                                | Tgif2(Homeobox)/mES-Tgif2-ChIP-Seq(GSE55404)/Hor   | 1.00E-23                                         | -53.325007  | 2150         | 52.15%       | 20109                             | 44.36%                               |        |
| 16                                             | Tgif1(Homeobox)/Hela-BMYB-ChIP-Seq(GSE55404)/Hor   | 1.00E-12                                         | -29.557101  | 1910         | 46.33%       | 18448.7                           | 40.70%                               |        |
|                                                | Meis1(Homeobox)/MastCells-Meis1-ChIP-Seq(GSE480    | 1.00E-10                                         | -23.383307  | 1209         | 29.32%       | 11293.1                           | 24.91%                               |        |
| 17                                             | Tbx20(T-box)/Heart-Tbx20-ChIP-Seq(GSE29636)/Home   | 1.00E-06                                         | -15.418607  | 193          | 4.68%        | 1447.9                            | 3.19%                                |        |
|                                                | MYB101(MYB)/colamp-MYB101-DAP-Seq(GSE60143)/I      | 1.00E-22                                         | -51.466002  | 1136         | 27.55%       | 9561.3                            | 21.09%                               |        |
| 18                                             | MYB65(MYB)/colamp-MYB65-DAP-Seq(GSE60143)/Ho       | 1.00E-13                                         | -31.661416  | 598          | 14.50%       | 4840.6                            | 10.68%                               |        |
|                                                | BMYB(HTH)/Hela-BMYB-ChIP-Seq(GSE27030)/Homer       | 1.00E-11                                         | -26.440787  | 888          | 21.54%       | 7869.5                            | 17.36%                               |        |
| 19                                             | MYB73(MYB)/col-MYB73-DAP-Seq(GSE60143)/Homer       | 1.00E-06                                         | -15.280078  | 908          | 22.02%       | 8558.7                            | 18.88%                               |        |
|                                                | MYB33(MYB)/col-MYB33-DAP-Seq(GSE60143)/Homer       | 1.00E-06                                         | -13.845299  | 803          | 19.48%       | 7546.5                            | 16.65%                               |        |
| 20                                             | MYB81(MYB)/col-MYB81-DAP-Seq(GSE60143)/Homer       | 1.00E-05                                         | -12.517525  | 669          | 16.23%       | 6235.1                            | 13.75%                               |        |
|                                                | MYB70(MYB)/col-MYB70-DAP-Seq(GSE60143)/Homer       | 1.00E-05                                         | -12.48316   | 670          | 16.25%       | 6247.8                            | 13.88%                               |        |
| 21                                             | AT3G10030(Trihelix)/colamp-AT3G10030-DAP-Seq(GSI   | 1.00E-04                                         | -9.262383   | 255          | 6.18%        | 2210.1                            | 4.87%                                |        |
|                                                | MYB56(MYB)/colamp-MYB56-DAP-Seq(GSE60143)/Ho       | 1.00E-03                                         | -8.277843   | 347          | 8.42%        | 3167.4                            | 6.99%                                |        |
| 22                                             | MYB119(MYB)/colamp-MYB119-DAP-Seq(GSE60143)/I      | 1.00E-02                                         | -6.748031   | 119          | 2.89%        | 977.6                             | 2.16%                                |        |
|                                                | MYB98(MYB)/col-MYB98-DAP-Seq(GSE60143)/Homer       | 1.00E-02                                         | -5.769339   | 120          | 2.91%        | 1017.8                            | 2.25%                                |        |
| 23                                             | MYB118(MYB)/colamp-MYB118-DAP-Seq(GSE60143)/I      | 1.00E-02                                         | -5.44207    | 120          | 2.91%        | 1028.8                            | 2.27%                                |        |

NEUROD1\_only

|                                                        |          |            |      |        |         |        |
|--------------------------------------------------------|----------|------------|------|--------|---------|--------|
| MYB105(MYB)/colamp-MYB105-DAP-Seq(GSE60143)/           | 1.00E-02 | -6.413887  | 239  | 5.80%  | 2167.4  | 4.78%  |
| 15 Unknown-ESC-element(?) / mES-Nanog-ChIP-Seq(GSE1    | 1.00E-18 | -42.782853 | 661  | 16.03% | 5160.7  | 11.38% |
| Zic(Zf)/Cerebellum-ZIC1.2-ChIP-Seq(GSE60731)/Homer     | 1.00E-15 | -36.147983 | 773  | 18.75% | 6410.5  | 14.14% |
| Zic3(Zf)/mES-Zic3-ChIP-Seq(GSE37889)/Homer             | 1.00E-12 | -29.692163 | 636  | 15.43% | 5262.9  | 11.61% |
| 16 Pitx1:Ebox(Homeobox,bHLH)/Hindlimb-Pitx1-ChIP-Seq(t | 1.00E-16 | -37.229527 | 154  | 3.74%  | 806.3   | 1.78%  |
| 17 c-Jun-CRE(bZIP)/K562-cJun-ChIP-Seq(GSE31477)/Home   | 1.00E-16 | -37.614235 | 238  | 5.77%  | 1464.1  | 3.23%  |
| Atf7(bZIP)/3T3L1-Atf7-ChIP-Seq(GSE56872)/Homer         | 1.00E-15 | -36.457523 | 330  | 8.00%  | 2263.1  | 4.99%  |
| JunD(bZIP)/K562-JunD-ChIP-Seq/Homer                    | 1.00E-15 | -34.799109 | 83   | 2.01%  | 328.4   | 0.72%  |
| Atf2(bZIP)/3T3L1-Atf2-ChIP-Seq(GSE56872)/Homer         | 1.00E-14 | -33.142879 | 246  | 5.97%  | 1594.1  | 3.52%  |
| Atf1(bZIP)/K562-ATF1-ChIP-Seq(GSE31477)/Homer          | 1.00E-14 | -33.673523 | 431  | 10.45% | 3222.2  | 7.11%  |
| bZIP50(bZIP)/colamp-bZIP50-DAP-Seq(GSE60143)/Hon       | 1.00E-12 | -28.533479 | 540  | 13.10% | 4369.2  | 9.64%  |
| TGA6(bZIP)/colamp-TGA6-DAP-Seq(GSE60143)/Homer         | 1.00E-10 | -23.027659 | 333  | 8.08%  | 2558.1  | 5.64%  |
| TGA5(bZIP)/col-TGA5-DAP-Seq(GSE60143)/Homer            | 1.00E-09 | -22.821962 | 65   | 1.58%  | 290     | 0.64%  |
| TGA4(bZIP)/colamp-TGA4-DAP-Seq(GSE60143)/Homer         | 1.00E-09 | -21.85858  | 174  | 4.22%  | 1158.1  | 2.55%  |
| CRE(bZIP)/Promoter/Homer                               | 1.00E-08 | -19.237513 | 160  | 3.88%  | 1081.9  | 2.39%  |
| TGA1(bZIP)/colamp-TGA1-DAP-Seq(GSE60143)/Homer         | 1.00E-08 | -18.96247  | 234  | 5.68%  | 1742.2  | 3.84%  |
| TGA3(bZIP)/colamp-TGA3-DAP-Seq(GSE60143)/Homer         | 1.00E-05 | -12.144188 | 38   | 0.92%  | 184.5   | 0.41%  |
| FEA4(bZIP)/Corn-FEA4-ChIP-Seq(GSE61954)/Homer          | 1.00E-04 | -9.971986  | 628  | 15.23% | 5949.9  | 13.13% |
| 18 RBPJ:Ebox(?,bHLH)/Panc1-Rbpj1-ChIP-Seq(GSE47459)/   | 1.00E-14 | -33.816132 | 359  | 8.71%  | 2567.3  | 5.66%  |
| Hoxd13(Homeobox)/ChickenMSG-Hoxd13.Flag-ChIP-Seq       | 1.00E-14 | -34.2219   | 809  | 19.62% | 6820.4  | 15.05% |
| PABPC1(?)/MEL-PAB1-CLIP-Seq(GSE69755)/Homer            | 1.00E-11 | -26.737593 | 819  | 19.86% | 7164.3  | 15.80% |
| HOXD13(Homeobox)/Chicken-Hoxd13-ChIP-Seq(GSE385        | 1.00E-11 | -27.351217 | 502  | 12.18% | 4038.2  | 9.07%  |
| Unknown(Homeobox)/Limb-p300-ChIP-Seq/Homer             | 1.00E-09 | -22.652532 | 350  | 8.49%  | 2725.3  | 6.01%  |
| Hoxa13(Homeobox)/ChickenMSG-Hoxa13.Flag-ChIP-Seq       | 1.00E-08 | -19.56574  | 1181 | 28.64% | 11183.7 | 24.67% |
| HOBX13(Homeobox)/ProstateTumor-HOBX13-ChIP-Seq         | 1.00E-08 | -19.820669 | 512  | 12.42% | 4359.6  | 9.62%  |
| Hoxd11(Homeobox)/ChickenMSG-Hoxd11.Flag-ChIP-Seq       | 1.00E-08 | -19.855261 | 1222 | 29.64% | 11598.5 | 25.59% |
| Hoxa9(Homeobox)/ChickenMSG-Hoxa9.Flag-ChIP-Seq(t       | 1.00E-08 | -20.240414 | 1451 | 35.19% | 13995.6 | 30.87% |
| Hoxa11(Homeobox)/ChickenMSG-Hoxa11.Flag-ChIP-Seq       | 1.00E-07 | -16.189177 | 1131 | 27.43% | 10836.4 | 23.90% |
| CDX4(Homeobox)/ZebrafishEmbryos-Cdx4.Myc-ChIP-Seq      | 1.00E-07 | -18.304785 | 413  | 10.02% | 3444.1  | 7.60%  |
| caudal(Homeobox)/Drosophila-Embryos-ChIP-Seq(moc       | 1.00E-05 | -11.729106 | 354  | 8.59%  | 3092.9  | 6.82%  |
| Cdx2(Homeobox)/mES-Cdx2-ChIP-Seq(GSE14586)/Homer       | 1.00E-04 | -10.129786 | 282  | 6.84%  | 2443.7  | 5.39%  |
| 20 Smad4(MAD)/ESC-SMAD4-ChIP-Seq(GSE29422)/Homer       | 1.00E-13 | -30.90064  | 1193 | 28.94% | 10812.3 | 23.85% |
| Smad2(MAD)/ES-SMAD2-ChIP-Seq(GSE29422)/Homer           | 1.00E-11 | -26.906174 | 1144 | 27.75% | 10466.3 | 23.09% |
| Smad3(MAD)/NPC-Smad3-ChIP-Seq(GSE36673)/Homer          | 1.00E-10 | -24.68187  | 1872 | 45.40% | 18274   | 40.31% |
| 21 TGA10(bZIP)/colamp-TGA10-DAP-Seq(GSE60143)/Hon      | 1.00E-13 | -31.608715 | 353  | 8.56%  | 2556.2  | 5.64%  |
| ATAF1(NAC)/col-ATAF1-DAP-Seq(GSE60143)/Homer           | 1.00E-06 | -14.896726 | 1116 | 27.07% | 10751.7 | 23.72% |
| TGA9(bZIP)/colamp-TGA9-DAP-Seq(GSE60143)/Homer         | 1.00E-06 | -14.85263  | 652  | 15.81% | 5950.6  | 13.13% |
| TGA2(bZIP)/colamp-TGA2-DAP-Seq(GSE60143)/Homer         | 1.00E-05 | -11.950224 | 281  | 6.82%  | 2370.7  | 5.23%  |
| 22 AP-2alpha(AP2)/Hela-AP2alpha-ChIP-Seq(GSE31477)/f   | 1.00E-12 | -29.006237 | 775  | 18.80% | 6648.4  | 14.67% |
| AP-2gamma(AP2)/MCF7-TFAP2C-ChIP-Seq(GSE21234),         | 1.00E-09 | -22.139117 | 948  | 22.99% | 8650.2  | 19.08% |
| 23 MafA(bZIP)/Islet-MafA-ChIP-Seq(GSE30298)/Homer      | 1.00E-12 | -29.740913 | 664  | 16.10% | 5533.8  | 12.21% |
| BATF(bZIP)/Th17-BATF-ChIP-Seq(GSE39756)/Homer          | 1.00E-10 | -23.368189 | 400  | 9.70%  | 3176.2  | 7.01%  |
| JunB(bZIP)/DendriticCells-JunB-ChIP-Seq(GSE36099)/H    | 1.00E-10 | -23.072739 | 354  | 8.59%  | 2753    | 6.07%  |
| Atf3(bZIP)/GBM-ATF3-ChIP-Seq(GSE33912)/Homer           | 1.00E-09 | -21.338632 | 403  | 9.77%  | 3259.5  | 7.19%  |
| Fra1(bZIP)/BT549-Fra1-ChIP-Seq(GSE46166)/Homer         | 1.00E-09 | -21.404825 | 344  | 8.34%  | 2700.5  | 5.96%  |
| AP-1(bZIP)/ThioMac-PU-1-ChIP-Seq(GSE21512)/Homer       | 1.00E-08 | -19.891706 | 459  | 11.13% | 3840.6  | 8.47%  |
| Fra2(bZIP)/Striatum-Fra2-ChIP-Seq(GSE43429)/Homer      | 1.00E-07 | -17.176975 | 303  | 7.35%  | 2425.1  | 5.35%  |
| Jun-AP1(bZIP)/K562-cJun-ChIP-Seq(GSE31477)/Homer       | 1.00E-06 | -14.719093 | 161  | 3.90%  | 1173.2  | 2.59%  |
| FosI2(bZIP)/3T3L1-FosI2-ChIP-Seq(GSE56872)/Homer       | 1.00E-04 | -11.279494 | 209  | 5.07%  | 1700.9  | 3.75%  |
| Nrf2(bZIP)/Lymphoblast-Nrf2-ChIP-Seq(GSE37589)/Ho      | 1.00E-02 | -6.253091  | 38   | 0.92%  | 249     | 0.55%  |
| NF-E2(bZIP)/K562-NFE2-ChIP-Seq(GSE31477)/Homer         | 1.00E-02 | -5.772552  | 46   | 1.12%  | 326.7   | 0.72%  |
| Bach2(bZIP)/OCIY7-Bach2-ChIP-Seq(GSE44420)/Home        | 1.00E-02 | -5.318041  | 130  | 3.15%  | 1130.6  | 2.49%  |
| 24 Pdx1(Homeobox)/Islet-Pdx1-ChIP-Seq(SRA008281)/Hor   | 1.00E-12 | -29.029785 | 581  | 14.09% | 4749.4  | 10.48% |
| HoxA9(Homeobox)/HSC-Hoxa9-ChIP-Seq(GSE33509)/H         | 1.00E-10 | -23.922772 | 383  | 9.29%  | 3002.4  | 6.62%  |
| LIN-39(Homeobox)/cElegans.L3-LIN39-ChIP-Seq(modEr      | 1.00E-09 | -20.91597  | 602  | 14.60% | 5208.9  | 11.49% |
| PBX2(Homeobox)/K562-PBX2-ChIP-Seq(Encode)/Homer        | 1.00E-09 | -21.670683 | 456  | 11.06% | 3757.7  | 8.29%  |
| Hoxc9(Homeobox)/Ainv15-Hoxc9-ChIP-Seq(GSE21812)/       | 1.00E-09 | -22.664473 | 290  | 7.07%  | 2171    | 4.79%  |
| Hoxb4(Homeobox)/ES-Hoxb4-ChIP-Seq(GSE34014)/Hor        | 1.00E-07 | -16.272294 | 134  | 3.25%  | 907.9   | 2.00%  |
| HoxA1(Homeobox)/mES-Hoxa1-ChIP-Seq(SRP084292)/         | 1.00E-04 | -10.416261 | 162  | 3.93%  | 1281.7  | 2.83%  |
| 25 GLIS3(Zf)/Thyroid-Glis3.GFP-ChIP-Seq(GSE103297)/Ho  | 1.00E-11 | -27.297235 | 1222 | 29.64% | 11257.9 | 24.83% |
| 26 AARE(HLH)/mES-cMyc-ChIP-Seq/Homer                   | 1.00E-11 | -26.899534 | 85   | 2.06%  | 396.4   | 0.87%  |
| Atf4(bZIP)/MEF-Atf4-ChIP-Seq(GSE35681)/Homer           | 1.00E-09 | -21.875193 | 188  | 4.56%  | 1278.3  | 2.82%  |
| Chop(bZIP)/MEF-Chop-ChIP-Seq(GSE35681)/Homer           | 1.00E-09 | -21.663305 | 152  | 3.69%  | 975.6   | 2.15%  |
| CEBP-AP1(bZIP)/ThioMac-CEBPb-ChIP-Seq(GSE21512)/       | 1.00E-06 | -15.842374 | 433  | 10.50% | 3720.9  | 8.21%  |
| 27 Sox10(HMG)/SciaticNerve-Sox3-ChIP-Seq(GSE35132)/f   | 1.00E-11 | -25.939955 | 985  | 23.89% | 8873.3  | 19.57% |
| Sox2(HMG)/mES-Sox2-ChIP-Seq(GSE11431)/Homer            | 1.00E-11 | -26.39694  | 539  | 13.07% | 4419.3  | 9.75%  |
| Sox17(HMG)/Endoderm-Sox17-ChIP-Seq(GSE61475)/H         | 1.00E-11 | -25.857707 | 453  | 10.99% | 3612.3  | 7.97%  |
| Sox3(HMG)/NPC-Sox3-ChIP-Seq(GSE33059)/Homer            | 1.00E-09 | -22.840072 | 994  | 24.11% | 9092.1  | 20.06% |
| Sox15(HMG)/CPA-Sox15-ChIP-Seq(GSE62909)/Homer          | 1.00E-09 | -21.673589 | 617  | 14.96% | 5330.8  | 11.76% |
| Sox6(HMG)/Myotubes-Sox6-ChIP-Seq(GSE32627)/Hom         | 1.00E-09 | -21.089128 | 898  | 21.78% | 8183    | 18.05% |
| Sox4(HMG)/proB-Sox4-ChIP-Seq(GSE50066)/Homer           | 1.00E-07 | -17.168982 | 525  | 12.73% | 4580.5  | 10.10% |
| Sox9(HMG)/Limb-SOX9-ChIP-Seq(GSE73225)/Homer           | 1.00E-05 | -13.571863 | 567  | 13.75% | 5146.4  | 11.35% |
| 28 ANL2(HB)/col-ANL2-DAP-Seq(GSE60143)/Homer           | 1.00E-10 | -24.879328 | 285  | 6.91%  | 2079.3  | 4.59%  |
| HDG1(Homeobox)/col100-HDG1-DAP-Seq(GSE60143)/f         | 1.00E-07 | -17.473918 | 239  | 5.80%  | 1821.3  | 4.02%  |
| 29 ARF2(ARF)/col-ARF2-DAP-Seq(GSE60143)/Homer          | 1.00E-10 | -24.509665 | 1726 | 41.86% | 16710.5 | 36.86% |
| DDF1(AP2EREBP)/col-DDF1-DAP-Seq(GSE60143)/Homi         | 1.00E-02 | -4.787525  | 123  | 2.98%  | 1081.5  | 2.39%  |
| CBF2(AP2EREBP)/colamp-CBF2-DAP-Seq(GSE60143)/f         | 1.00E-02 | -6.54857   | 139  | 3.37%  | 1175.1  | 2.59%  |
| CBF3(AP2EREBP)/colamp-CBF3-DAP-Seq(GSE60143)/f         | 1.00E-02 | -6.04416   | 143  | 3.47%  | 1231.4  | 2.72%  |
| CBF1(AP2EREBP)/colamp-CBF1-DAP-Seq(GSE60143)/f         | 1.00E-02 | -4.628706  | 191  | 4.63%  | 1768.4  | 3.90%  |
| 30 Nkx2.1(Homeobox)/LungAC-Nkx2.1-ChIP-Seq(GSE4325)    | 1.00E-10 | -23.246126 | 1712 | 41.52% | 16624.6 | 36.67% |
| Bapx1(Homeobox)/VertebralCol-Bapx1-ChIP-Seq(GSE3       | 1.00E-09 | -22.597855 | 1274 | 30.90% | 12010   | 26.49% |
| Nkx2.2(Homeobox)/NPC-Nkx2.2-ChIP-Seq(GSE61673)/f       | 1.00E-08 | -20.479024 | 1267 | 30.73% | 12039.4 | 26.56% |
| Nkx3.1(Homeobox)/LNCaP-Nkx3.1-ChIP-Seq(GSE28264        | 1.00E-08 | -20.70813  | 1331 | 32.28% | 12701.5 | 28.02% |
| Nkx2.5(Homeobox)/HL1-Nkx2.5.biotin-ChIP-Seq(GSE21      | 1.00E-07 | -17.991458 | 1374 | 33.33% | 13300.3 | 29.34% |

## ASCL1\_NEUROD1\_overlap

| Cluster | Name                                                          | PValue   | log(PValue) | # Target | Seq % of Targets | # Background | % of Background Sequences with Motif |
|---------|---------------------------------------------------------------|----------|-------------|----------|------------------|--------------|--------------------------------------|
| 1       | NeuroD1(bHLH)/Isl1-NeuroD1-ChIP-Seq(GSE30298)/Homer           | 1.00E-75 | -174.52443  | 1737     | 37.85%           | 10484.4      | 25.44%                               |
|         | Atoh1(bHLH)/Cerebellum-Atoh1-ChIP-Seq(GSE22111)/Homer         | 1.00E-72 | -168.04874  | 2187     | 47.66%           | 14272.4      | 34.63%                               |
|         | Ascl1(bHLH)/NeuralTubes-Ascl1-ChIP-Seq(GSE55840)/Homer        | 1.00E-72 | -166.40792  | 3038     | 66.20%           | 21867        | 53.06%                               |
|         | Tcf12(bHLH)/GM12878-Tcf12-ChIP-Seq(GSE32465)/Homer            | 1.00E-63 | -145.58959  | 2230     | 48.59%           | 15003.5      | 36.40%                               |
|         | Tcf21(bHLH)/ArterySmoothMuscle-Tcf21-ChIP-Seq(GSE61369)/Homer | 1.00E-62 | -144.39505  | 2047     | 44.61%           | 13473.8      | 32.69%                               |
|         | NeuroG2(bHLH)/Fibroblast-NeuroG2-ChIP-Seq(GSE75910)/Homer     | 1.00E-59 | -136.57646  | 2411     | 52.54%           | 16727.7      | 40.59%                               |
|         | MyoG(bHLH)/C2C12-MyoG-ChIP-Seq(GSE36024)/Homer                | 1.00E-59 | -138.01485  | 2211     | 48.18%           | 14971.6      | 36.33%                               |
|         | Myf5(bHLH)/GM-Myf5-ChIP-Seq(GSE24852)/Homer                   | 1.00E-58 | -134.19041  | 1544     | 33.65%           | 9532.3       | 23.13%                               |
|         | E2A(bHLH)/proBcell-E2A-ChIP-Seq(GSE21978)/Homer               | 1.00E-51 | -118.6854   | 2896     | 63.11%           | 21426.2      | 51.99%                               |
|         | Ap4(bHLH)/AML-Tfap4-ChIP-Seq(GSE45738)/Homer                  | 1.00E-49 | -113.35674  | 2267     | 49.40%           | 15910.9      | 38.61%                               |
|         | HLH-1(bHLH)/cElegans-Embryo-HLH1-ChIP-Seq(modEncode)/Homer    | 1.00E-46 | -106.54549  | 1259     | 27.44%           | 7721.7       | 18.74%                               |
|         | TCF4(bHLH)/SHSYSY-TCF4-ChIP-Seq(GSE96915)/Homer               | 1.00E-43 | -99.468588  | 2370     | 51.65%           | 17094.3      | 41.48%                               |
|         | Olig2(bHLH)/Neuron-Olig2-ChIP-Seq(GSE30882)/Homer             | 1.00E-42 | -98.778918  | 2470     | 53.82%           | 17992.6      | 43.66%                               |
|         | MyoD(bHLH)/Myotube-MyoD-ChIP-Seq(GSE21614)/Homer              | 1.00E-42 | -98.76537   | 1788     | 38.96%           | 12125.9      | 29.42%                               |
|         | HEB(bHLH)/mES-Heb-ChIP-Seq(GSE53233)/Homer                    | 1.00E-40 | -93.809198  | 3250     | 70.82%           | 25276.8      | 61.33%                               |
|         | Ptf1a(bHLH)/Panc1-Ptf1a-ChIP-Seq(GSE47459)/Homer              | 1.00E-35 | -81.495517  | 3582     | 78.06%           | 28779.6      | 69.83%                               |
|         | bZIP52(bZIP)/colamp-bZIP52-DAP-Seq(GSE60143)/Homer            | 1.00E-23 | -53.83936   | 1627     | 35.45%           | 11783.3      | 28.59%                               |
|         | VIP1(bZIP)/col-VIP1-DAP-Seq(GSE60143)/Homer                   | 1.00E-21 | -50.036306  | 372      | 8.11%            | 1964.2       | 4.77%                                |
|         | bZIP69(bZIP)/col-bZIP69-DAP-Seq(GSE60143)/Homer               | 1.00E-20 | -47.006621  | 275      | 5.99%            | 1341.6       | 3.26%                                |
|         | E-box/Drosophila-Promoters/Homer                              | 1.00E-15 | -35.967152  | 397      | 8.65%            | 2337.3       | 5.67%                                |
|         | SCL(bHLH)/HPC7-ScL-ChIP-Seq(GSE13511)/Homer                   | 1.00E-04 | -11.44966   | 4014     | 87.47%           | 35146.1      | 85.28%                               |
| 2       | CTCF(Zf)/CD4+-CTCF-ChIP-Seq(Barski_et_al.)/Homer              | 1.00E-63 | -146.55895  | 522      | 11.38%           | 2084.5       | 5.06%                                |
|         | BORIS(Zf)/K562-CTCF-ChIP-Seq(GSE32465)/Homer                  | 1.00E-55 | -127.14668  | 902      | 19.66%           | 4777.8       | 11.59%                               |
| 3       | NF1(CTF)/LNCAP-NF1-ChIP-Seq(Unpublished)/Homer                | 1.00E-56 | -131.04517  | 1141     | 24.86%           | 6473.3       | 15.71%                               |
|         | Tlx7(NR)/NPC-H3K4me1-ChIP-Seq(GSE16256)/Homer                 | 1.00E-22 | -51.107091  | 944      | 20.57%           | 6245.7       | 15.15%                               |
| 4       | Sp1(Zf)/Promoter/Homer                                        | 1.00E-56 | -130.95318  | 1106     | 24.10%           | 6214         | 15.08%                               |
|         | Sp5(Zf)/mES-Sp5-Flag-ChIP-Seq(GSE72989)/Homer                 | 1.00E-16 | -39.017521  | 2270     | 49.47%           | 17815.1      | 43.23%                               |
| 5       | KLF3(Zf)/MEF-Klf3-ChIP-Seq(GSE44748)/Homer                    | 1.00E-40 | -93.104495  | 1385     | 30.18%           | 8940.7       | 21.69%                               |
|         | Klf9(Zf)/GBM-Klf9-ChIP-Seq(GSE62211)/Homer                    | 1.00E-29 | -67.583047  | 1106     | 24.10%           | 7195.2       | 17.46%                               |
|         | Klf4(Zf)/mES-Klf4-ChIP-Seq(GSE11431)/Homer                    | 1.00E-17 | -40.592484  | 945      | 20.59%           | 6491         | 15.75%                               |
|         | KLF10(Zf)/HEK293-KLF10-GFP-ChIP-Seq(GSE58341)/Homer           | 1.00E-12 | -28.002483  | 1160     | 25.28%           | 8619.1       | 20.91%                               |
|         | KLF6(Zf)/PDAC-KLF6-ChIP-Seq(GSE64557)/Homer                   | 1.00E-07 | -17.987671  | 2291     | 49.92%           | 18889.6      | 45.83%                               |
|         | KLF5(Zf)/LoVo-KLF5-ChIP-Seq(GSE49402)/Homer                   | 1.00E-05 | -13.572017  | 2533     | 55.20%           | 21315        | 51.72%                               |
|         | EKLF(Zf)/Erythrocyte-Klf1-ChIP-Seq(GSE20478)/Homer            | 1.00E-04 | -11.057203  | 413      | 9.00%            | 3024.9       | 7.34%                                |
| 6       | Elk1(ETS)/Hela-Elk1-ChIP-Seq(GSE31477)/Homer                  | 1.00E-38 | -88.691843  | 1307     | 28.48%           | 8397.9       | 20.38%                               |
|         | Elk4(ETS)/Hela-Elk4-ChIP-Seq(GSE31477)/Homer                  | 1.00E-37 | -85.38418   | 1302     | 28.37%           | 8417.2       | 20.42%                               |
|         | ETS(ETS)/Promoter/Homer                                       | 1.00E-36 | -83.434885  | 764      | 16.65%           | 4324         | 10.49%                               |
|         | ELF1(ETS)/Jurkat-ELF1-ChIP-Seq(SRA014231)/Homer               | 1.00E-30 | -70.419254  | 1168     | 25.45%           | 7632.7       | 18.52%                               |
|         | Fli1(ETS)/CD8-Fl1-ChIP-Seq(GSE20898)/Homer                    | 1.00E-22 | -50.957042  | 1865     | 40.64%           | 13893.6      | 33.71%                               |
|         | GABPA(ETS)/Jurkat-GABPa-ChIP-Seq(GSE17954)/Homer              | 1.00E-22 | -50.884217  | 1488     | 32.43%           | 10692.2      | 25.94%                               |
|         | Elf4(ETS)/BMDM-Elf4-ChIP-Seq(GSE88699)/Homer                  | 1.00E-19 | -45.055223  | 1511     | 32.93%           | 11045.4      | 26.80%                               |
|         | ETV4(ETS)/HepG2-ETV4-ChIP-Seq(ENCODE)/Homer                   | 1.00E-16 | -38.445222  | 1963     | 42.78%           | 15133.7      | 36.72%                               |
|         | EHF(ETS)/LoVo-EHF-ChIP-Seq(GSE49402)/Homer                    | 1.00E-16 | -37.15503   | 1633     | 35.59%           | 12323.5      | 29.90%                               |
|         | ETV1(ETS)/GIST48-ETV1-ChIP-Seq(GSE22441)/Homer                | 1.00E-13 | -31.803967  | 2001     | 43.60%           | 15704.5      | 38.11%                               |
|         | EWS-FLI1-fusion(ETS)/SK_N_MC-EWS-FLI1-ChIP-Seq(SRA0142)       | 1.00E-12 | -27.638855  | 900      | 19.61%           | 6474         | 15.71%                               |
|         | EWS-ERG-fusion(ETS)/CADO_ES1-EWS-ERG-ChIP-Seq(SRA014)         | 1.00E-10 | -23.222817  | 806      | 17.56%           | 5837.9       | 14.17%                               |
|         | ELF5(ETS)/T47D-ELF5-ChIP-Seq(GSE30407)/Homer                  | 1.00E-10 | -23.826337  | 948      | 20.66%           | 6990.2       | 16.96%                               |
|         | SPDEF(ETS)/VCaP-SPDEF-ChIP-Seq(SRA014231)/Homer               | 1.00E-07 | -16.391987  | 1371     | 29.88%           | 10882.6      | 26.41%                               |
|         | ELF3(ETS)/PDAC-Elf3-ChIP-Seq(GSE64557)/Homer                  | 1.00E-07 | -17.863054  | 876      | 19.09%           | 6603.8       | 16.02%                               |
|         | ETS1-distal(ETS)/CD4+-Poll1-ChIP-Seq(Barski_et_al.)/Homer     | 1.00E-03 | -9.102192   | 367      | 8.00%            | 2718.5       | 6.60%                                |
| 7       | FOXA1(Forkhead)/MCF7-FOXA1-ChIP-Seq(GSE26831)/Homer           | 1.00E-36 | -84.037556  | 768      | 16.74%           | 4345.5       | 10.54%                               |
|         | FOXA1(Forkhead)/LNCAP-FOXA1-ChIP-Seq(GSE27824)/Homer          | 1.00E-33 | -78.177963  | 919      | 20.03%           | 5557.2       | 13.48%                               |
|         | FOXM1(Forkhead)/MCF7-FOXM1-ChIP-Seq(GSE72977)/Homer           | 1.00E-29 | -67.820095  | 805      | 17.54%           | 4860.7       | 11.79%                               |
|         | Foxa2(Forkhead)/Liver-Foxa2-ChIP-Seq(GSE25694)/Homer          | 1.00E-28 | -65.183308  | 724      | 15.78%           | 4294.7       | 10.42%                               |
|         | Foxf1(Forkhead)/Lung-Foxf1-ChIP-Seq(GSE77951)/Homer           | 1.00E-25 | -58.252122  | 656      | 14.30%           | 3896.2       | 9.45%                                |
|         | FoxL2(Forkhead)/Ovary-FoxL2-ChIP-Seq(GSE60858)/Homer          | 1.00E-23 | -54.960674  | 607      | 13.23%           | 3584.8       | 8.70%                                |
|         | Foxa3(Forkhead)/Liver-Foxa3-ChIP-Seq(GSE77670)/Homer          | 1.00E-22 | -51.181773  | 304      | 6.62%            | 1490         | 3.62%                                |
|         | FOXP1(Forkhead)/H9-FOXP1-ChIP-Seq(GSE31006)/Homer             | 1.00E-22 | -52.674316  | 402      | 8.76%            | 2140         | 5.19%                                |
|         | Foxo3(Forkhead)/U2OS-Foxo3-ChIP-Seq(E-MTAB-2701)/Homer        | 1.00E-22 | -51.743511  | 602      | 13.12%           | 3598.8       | 8.73%                                |
|         | FoxEbox(Forkhead,bHLH)/Panc1-Foxa2-ChIP-Seq(GSE47459)/Homer   | 1.00E-18 | -41.481452  | 997      | 21.73%           | 6889.4       | 16.72%                               |
|         | FOXK1(Forkhead)/HEK293-FOXK1-ChIP-Seq(GSE51673)/Homer         | 1.00E-18 | -41.73304   | 803      | 17.50%           | 5332.1       | 12.94%                               |
|         | PHA-4(Forkhead)/cElegans-Embryos-PHA4-ChIP-Seq(modEncoc)      | 1.00E-12 | -27.948015  | 2241     | 48.83%           | 17978.1      | 43.62%                               |
|         | FOXK2(Forkhead)/U2OS-FOXK2-ChIP-Seq(E-MTAB-2204)/Homer        | 1.00E-11 | -26.240789  | 564      | 12.29%           | 3803.2       | 9.23%                                |
|         | Foxo1(Forkhead)/RAW-Foxo1-ChIP-Seq(Fan_et_al.)/Homer          | 1.00E-10 | -23.892241  | 1815     | 39.55%           | 14395.9      | 34.93%                               |
| 8       | NRF1(NRF)/MCF7-NRF1-ChIP-Seq(Unpublished)/Homer               | 1.00E-27 | -63.448888  | 499      | 10.87%           | 2685.8       | 6.52%                                |
|         | NRF(NRF)/Promoter/Homer                                       | 1.00E-20 | -48.146118  | 504      | 10.98%           | 2931.2       | 7.11%                                |
| 9       | NF1-halfsite(CTF)/LNCaP-NF1-ChIP-Seq(Unpublished)/Homer       | 1.00E-26 | -60.930308  | 2604     | 56.74%           | 20120        | 48.82%                               |
|         | HIC1(Zf)/Treg-ZBTB29-ChIP-Seq(GSE99889)/Homer                 | 1.00E-09 | -20.866556  | 3091     | 67.36%           | 26002.4      | 63.09%                               |
| 10      | SHN3(AP2EREBP)/col-SHN3-DAP-Seq(GSE60143)/Homer               | 1.00E-25 | -58.083717  | 1257     | 27.39%           | 8607.9       | 20.89%                               |
|         | RRTF1(AP2EREBP)/colamp-RRTF1-DAP-Seq(GSE60143)/Homer          | 1.00E-22 | -51.107113  | 538      | 11.72%           | 3135.4       | 7.61%                                |
|         | AT4G18450(AP2EREBP)/col-AT4G18450-DAP-Seq(GSE60143)/Homer     | 1.00E-21 | -49.714805  | 1291     | 28.13%           | 9085.4       | 22.05%                               |
|         | ERF9(AP2EREBP)/colamp-ERF9-DAP-Seq(GSE60143)/Homer            | 1.00E-21 | -49.438141  | 924      | 20.14%           | 6122.7       | 14.86%                               |
|         | RAP212(AP2EREBP)/col-RAP212-DAP-Seq(GSE60143)/Homer           | 1.00E-19 | -44.97591   | 1643     | 35.80%           | 12166.8      | 29.52%                               |
|         | CRF4(AP2EREBP)/colamp-CRF4-DAP-Seq(GSE60143)/Homer            | 1.00E-19 | -45.072121  | 1548     | 33.73%           | 11357.6      | 27.56%                               |
|         | ERF1(AP2EREBP)/colamp-ERF1-DAP-Seq(GSE60143)/Homer            | 1.00E-18 | -41.578272  | 1695     | 36.94%           | 12713.6      | 30.85%                               |
|         | ERF5(AP2EREBP)/colamp-ERF5-DAP-Seq(GSE60143)/Homer            | 1.00E-18 | -42.1125    | 1350     | 29.42%           | 9777.7       | 23.72%                               |
|         | ERF3(AP2EREBP)/colamp-ERF3-DAP-Seq(GSE60143)/Homer            | 1.00E-17 | -40.386067  | 1586     | 34.56%           | 11819.9      | 28.68%                               |
|         | ERF10(AP2EREBP)/col-ERF10-DAP-Seq(GSE60143)/Homer             | 1.00E-16 | -38.584035  | 1646     | 35.87%           | 12388.4      | 30.06%                               |
|         | ABR1(AP2EREBP)/colamp-ABR1-DAP-Seq(GSE60143)/Homer            | 1.00E-15 | -35.21361   | 1837     | 40.03%           | 14148.2      | 34.33%                               |
|         | ERF2(AP2EREBP)/colamp-ERF2-DAP-Seq(GSE60143)/Homer            | 1.00E-15 | -36.716195  | 1807     | 39.38%           | 13837        | 33.57%                               |
|         | ERF73(AP2EREBP)/col-ERF73-DAP-Seq(GSE60143)/Homer             | 1.00E-15 | -35.266159  | 1795     | 39.12%           | 13782.1      | 33.44%                               |
|         | ERF11(AP2EREBP)/col-ERF11-DAP-Seq(GSE60143)/Homer             | 1.00E-14 | -34.127767  | 1810     | 39.44%           | 13952        | 33.85%                               |
|         | ERF13(AP2EREBP)/colamp-ERF13-DAP-Seq(GSE60143)/Homer          | 1.00E-13 | -30.875851  | 2072     | 45.15%           | 16364.7      | 39.71%                               |
|         | ESE1(AP2EREBP)/col-ESE1-DAP-Seq(GSE60143)/Homer               | 1.00E-13 | -31.982622  | 1901     | 41.43%           | 14822.7      | 35.97%                               |
|         | ERF8(AP2EREBP)/colamp-ERF8-DAP-Seq(GSE60143)/Homer            | 1.00E-11 | -25.84732   | 1929     | 42.04%           | 15310.5      | 37.15%                               |
|         | ERF4(AP2EREBP)/colamp-ERF4-DAP-Seq(GSE60143)/Homer            | 1.00E-11 | -25.744502  | 1935     | 42.17%           | 15367.1      | 37.29%                               |
|         | RAP26(AP2EREBP)/colamp-RAP26-DAP-Seq(GSE60143)/Homer          | 1.00E-09 | -21.218722  | 2065     | 45.00%           | 16716.7      | 40.56%                               |
|         | ERF105(AP2EREBP)/colamp-ERF105-DAP-Seq(GSE60143)/Homer        | 1.00E-07 | -17.140033  | 2458     | 53.56%           | 20432.8      | 49.58%                               |

## ASCL1\_NEUROD1\_overlap

|                                                           |          |            |      |        |         |        |
|-----------------------------------------------------------|----------|------------|------|--------|---------|--------|
| ERF104(AP2EREBP)/col-ERF104-DAP-Seq(GSE60143)/Homer       | 1.00E-06 | -15.964919 | 2117 | 46.13% | 17448.3 | 42.34% |
| ERF7(AP2EREBP)/col-ERF7-DAP-Seq(GSE60143)/Homer           | 1.00E-05 | -13.568211 | 2140 | 46.63% | 17793.6 | 43.17% |
| ERF115(AP2EREBP)/colamp-ERF115-DAP-Seq(GSE60143)/Horr     | 1.00E-03 | -7.832356  | 2373 | 51.71% | 20286.2 | 49.22% |
| At2g33710(AP2EREBP)/colamp-At2g33710-DAP-Seq(GSE60143)    | 1.00E-03 | -6.995776  | 2537 | 55.28% | 21834.9 | 52.98% |
| AT5G23930(mTERF)/col-AT5G23930-DAP-Seq(GSE60143)/Hon      | 1.00E-02 | -5.190446  | 2862 | 62.37% | 24945.4 | 60.53% |
| AT1G28160(AP2EREBP)/colamp-AT1G28160-DAP-Seq(GSE60143)    | 1.00E-02 | -5.049638  | 2673 | 58.25% | 23251.7 | 56.42% |
| 11 Slug(Zf)/Mesoderm-Snai2-ChIP-Seq(GSE61475)/Homer       | 1.00E-24 | -56.928109 | 1448 | 31.55% | 10205.6 | 24.76% |
| E2A(bHLH),near_PU.1/Bcell-PU.1-ChIP-Seq(GSE21512)/Homer   | 1.00E-15 | -35.835862 | 2536 | 55.26% | 20308.6 | 49.28% |
| ZEB1(Zf)/PDAC-ZEB1-ChIP-Seq(GSE64557)/Homer               | 1.00E-07 | -16.189666 | 2601 | 56.68% | 21775   | 52.84% |
| ZEB2(Zf)/SNU398-ZEB2-ChIP-Seq(GSE103048)/Homer            | 1.00E-05 | -12.768641 | 1806 | 39.35% | 14881.8 | 36.11% |
| NGA4(ABI3VP1)/col-NGA4-DAP-Seq(GSE60143)/Homer            | 1.00E-02 | -5.935041  | 3065 | 66.79% | 26714.1 | 64.82% |
| 12 E2FA(E2FDP)/colamp-E2FA-DAP-Seq(GSE60143)/Homer        | 1.00E-23 | -53.642685 | 956  | 20.83% | 6287.8  | 15.26% |
| E2F(E2F)/Hela-CellCycle-Expression/Homer                  | 1.00E-08 | -19.522302 | 182  | 3.97%  | 1034.3  | 2.51%  |
| 13 ZBTB18(Zf)/HEK293-ZBTB18.GFP-ChIP-Seq(GSE58341)/Homer  | 1.00E-23 | -53.698037 | 936  | 20.40% | 6128.1  | 14.87% |
| Tal1                                                      | 1.00E-14 | -34.093417 | 1735 | 37.81% | 13304.4 | 32.28% |
| 14 LEP(AP2EREBP)/col-LEP-DAP-Seq(GSE60143)/Homer          | 1.00E-22 | -51.541308 | 1061 | 23.12% | 7169.2  | 17.40% |
| PUC1(AP2EREBP)/colamp-PUC1-DAP-Seq(GSE60143)/Homer        | 1.00E-15 | -34.648027 | 1702 | 37.09% | 13000.2 | 31.54% |
| CRF10(AP2EREBP)/col100-CRF10-DAP-Seq(GSE60143)/Homer      | 1.00E-07 | -18.207711 | 2172 | 47.33% | 17816.2 | 43.23% |
| 15 Rfx2(HTH)/LoVo-Rfx2-ChIP-Seq(GSE49402)/Homer           | 1.00E-21 | -49.398825 | 239  | 5.21%  | 1085.6  | 2.63%  |
| RFX(HTH)/K562-RFX3-ChIP-Seq(GSE31477)/Homer               | 1.00E-21 | -48.611305 | 219  | 4.77%  | 966.8   | 2.35%  |
| Rfx1(HTH)/NPC-H3K4me1-ChIP-Seq(GSE16256)/Homer            | 1.00E-16 | -37.127779 | 391  | 8.52%  | 2266.5  | 5.50%  |
| X-box(HTH)/NPC-H3K4me1-ChIP-Seq(GSE16256)/Homer           | 1.00E-13 | -31.25819  | 202  | 4.40%  | 1023.9  | 2.48%  |
| 16 CAMTA1(CAMTA)/col-CAMTA1-DAP-Seq(GSE60143)/Homer       | 1.00E-21 | -48.999656 | 946  | 20.61% | 6306.6  | 15.30% |
| CAMTA5(CAMTA)/col-CAMTA5-DAP-Seq(GSE60143)/Homer          | 1.00E-03 | -8.359673  | 339  | 7.39%  | 2516.5  | 6.11%  |
| 17 E2F4(E2F)/K562-E2F4-ChIP-Seq(GSE31477)/Homer           | 1.00E-20 | -46.771759 | 1271 | 27.70% | 8995.9  | 21.83% |
| E2F6(E2F)/Hela-E2F6-ChIP-Seq(GSE31477)/Homer              | 1.00E-18 | -42.658138 | 1467 | 31.97% | 10743.5 | 26.07% |
| DEL2(E2FDP)/col-DEL2-DAP-Seq(GSE60143)/Homer              | 1.00E-17 | -39.4896   | 804  | 17.52% | 5390.8  | 13.08% |
| E2F3(E2F)/MEF-E2F3-ChIP-Seq(GSE71376)/Homer               | 1.00E-17 | -41.070451 | 1632 | 35.56% | 12190   | 29.58% |
| E2F1(E2F)/Hela-E2F1-ChIP-Seq(GSE22478)/Homer              | 1.00E-17 | -40.824396 | 829  | 18.06% | 5558.7  | 13.49% |
| E2F7(E2F)/Hela-E2F7-ChIP-Seq(GSE32673)/Homer              | 1.00E-11 | -27.267966 | 418  | 9.11%  | 2648.6  | 6.43%  |
| 18 At5g65130(AP2EREBP)/colamp-At5g65130-DAP-Seq(GSE60143) | 1.00E-20 | -48.112913 | 619  | 13.49% | 3786.9  | 9.19%  |
| DREB19(AP2EREBP)/colamp-DREB19-DAP-Seq(GSE60143)/Hor      | 1.00E-15 | -34.868074 | 847  | 18.46% | 5844.7  | 14.18% |
| At1g36060(AP2EREBP)/colamp-At1g36060-DAP-Seq(GSE60143)    | 1.00E-11 | -26.618619 | 1045 | 22.77% | 7704    | 18.69% |
| DEAR2(AP2EREBP)/colamp-DEAR2-DAP-Seq(GSE60143)/Home       | 1.00E-11 | -26.838388 | 1529 | 33.32% | 11795.1 | 28.62% |
| At4g28140(AP2EREBP)/colamp-At4g28140-DAP-Seq(GSE60143)    | 1.00E-10 | -25.133761 | 638  | 13.90% | 4419.8  | 10.72% |
| DREB2(AP2EREBP)/col-DREB2-DAP-Seq(GSE60143)/Homer         | 1.00E-10 | -23.479505 | 674  | 14.69% | 4754.8  | 11.54% |
| CEJ1(AP2EREBP)/col-CEJ1-DAP-Seq(GSE60143)/Homer           | 1.00E-08 | -19.528107 | 1353 | 29.48% | 10582.9 | 25.68% |
| AT1G44830(AP2EREBP)/col-AT1G44830-DAP-Seq(GSE60143)/I     | 1.00E-08 | -20.53015  | 656  | 14.30% | 4695.3  | 11.39% |
| DREB26(AP2EREBP)/col-DREB26-DAP-Seq(GSE60143)/Homer       | 1.00E-07 | -17.528822 | 491  | 10.70% | 3451.6  | 8.38%  |
| ERF38(AP2EREBP)/col-ERF38-DAP-Seq(GSE60143)/Homer         | 1.00E-06 | -14.946887 | 697  | 15.19% | 5222.1  | 12.67% |
| AT1G71450(AP2EREBP)/col-AT1G71450-DAP-Seq(GSE60143)/I     | 1.00E-06 | -16.059885 | 2174 | 47.37% | 17950.2 | 43.55% |
| bHLH10(bHLH)/colamp-bHLH10-DAP-Seq(GSE60143)/Homer        | 1.00E-05 | -12.325111 | 403  | 8.78%  | 2900.8  | 7.04%  |
| AT3G16280(AP2EREBP)/colamp-AT3G16280-DAP-Seq(GSE60143)    | 1.00E-05 | -13.674724 | 472  | 10.29% | 3416.2  | 8.29%  |
| DEAR5(AP2EREBP)/col-DEAR5-DAP-Seq(GSE60143)/Homer         | 1.00E-05 | -12.108854 | 265  | 5.77%  | 1804.1  | 4.38%  |
| At1g22810(AP2EREBP)/colamp-At1g22810-DAP-Seq(GSE60143)    | 1.00E-05 | -13.573684 | 655  | 14.27% | 4926.7  | 11.95% |
| At1g19210(AP2EREBP)/colamp-At1g19210-DAP-Seq(GSE60143)    | 1.00E-04 | -10.388186 | 1848 | 40.27% | 15407.8 | 37.39% |
| TINY(AP2EREBP)/col-TINY-DAP-Seq(GSE60143)/Homer           | 1.00E-04 | -10.026497 | 356  | 7.76%  | 2595.7  | 6.30%  |
| At4g31060(AP2EREBP)/colamp-At4g31060-DAP-Seq(GSE60143)    | 1.00E-04 | -9.351587  | 521  | 11.35% | 3984.9  | 9.67%  |
| DEAR3(AP2EREBP)/colamp-DEAR3-DAP-Seq(GSE60143)/Home       | 1.00E-04 | -10.866826 | 454  | 9.89%  | 3367.1  | 8.17%  |
| At2g44940(AP2EREBP)/colamp-At2g44940-DAP-Seq(GSE60143)    | 1.00E-03 | -8.268527  | 267  | 5.82%  | 1932.4  | 4.69%  |
| At1g75490(AP2EREBP)/colamp-At1g75490-DAP-Seq(GSE60143)    | 1.00E-03 | -8.866542  | 2303 | 50.19% | 19574.6 | 47.50% |
| At1g77640(AP2EREBP)/col-At1g77640-DAP-Seq(GSE60143)/Hc    | 1.00E-02 | -6.472161  | 339  | 7.39%  | 2593.9  | 6.29%  |
| 19 HINFP(Zf)/K562-HINFP.eGFP-ChIP-Seq(Encode)/Homer       | 1.00E-18 | -42.345738 | 1063 | 23.16% | 7403.2  | 17.96% |
| 20 NFY(CCAAT)/Promoter/Homer                              | 1.00E-17 | -40.458845 | 957  | 20.85% | 6591.2  | 15.99% |
| 21 LOB(LOBAS2)/col-LOB-DAP-Seq(GSE60143)/Homer            | 1.00E-17 | -40.274722 | 693  | 15.10% | 4501.5  | 10.92% |
| AS2(LOBAS2)/col-AS2-DAP-Seq(GSE60143)/Homer               | 1.00E-10 | -25.087058 | 280  | 6.10%  | 1656.4  | 4.02%  |
| LBD19(LOBAS2)/colamp-LBD19-DAP-Seq(GSE60143)/Homer        | 1.00E-05 | -12.815412 | 1891 | 41.21% | 15629.3 | 37.92% |
| ASL18(LOBAS2)/colamp-ASL18-DAP-Seq(GSE60143)/Homer        | 1.00E-03 | -8.825688  | 2237 | 48.75% | 18986.5 | 46.07% |
| 22 LBD23(LOBAS2)/colamp-LBD23-DAP-Seq(GSE60143)/Homer     | 1.00E-16 | -39.005247 | 1584 | 34.52% | 11845.7 | 28.74% |
| 23 YY1(Zf)/Promoter/Homer                                 | 1.00E-16 | -38.632266 | 189  | 4.12%  | 864.2   | 2.10%  |
| 24 Ronin(THAP)/ES-Thap11-ChIP-Seq(GSE51522)/Homer         | 1.00E-16 | -37.31677  | 111  | 2.42%  | 405.5   | 0.98%  |
| GFY-Staff(Zf)/Promoter/Homer                              | 1.00E-13 | -31.136613 | 133  | 2.90%  | 578.9   | 1.40%  |
| 25 Rfx5(HTH)/GM12878-Rfx5-ChIP-Seq(GSE31477)/Homer        | 1.00E-16 | -37.356329 | 472  | 10.29% | 2869.8  | 6.96%  |
| Rfx6(HTH)/Min6b1-Rfx6-HA-ChIP-Seq(GSE62844)/Homer         | 1.00E-11 | -25.411261 | 1716 | 37.39% | 13468.8 | 32.68% |
| 26 DPL-1(E2F)/cElegans-Adult-ChIP-Seq(modEncode)/Homer    | 1.00E-16 | -38.563559 | 1673 | 36.46% | 12620.9 | 30.62% |
| FHY3(FAR1)/Arabidopsis-FHY3-ChIP-Seq(GSE30711)/Homer      | 1.00E-08 | -19.464988 | 771  | 16.80% | 5672.5  | 13.76% |
| FAR1(FAR1)/col-FAR1-DAP-Seq(GSE60143)/Homer               | 1.00E-04 | -11.337781 | 347  | 7.56%  | 2479.3  | 6.02%  |
| 27 p63(p53)/Keratinocyte-p63-ChIP-Seq(GSE17611)/Homer     | 1.00E-15 | -35.032239 | 561  | 12.22% | 3587.1  | 8.70%  |
| p53(p53)/Saos-p53-ChIP-Seq(GSE15780)/Homer                | 1.00E-13 | -31.497284 | 150  | 3.27%  | 681.8   | 1.65%  |
| p53(p53)/Saos-p53-ChIP-Seq/Homer                          | 1.00E-13 | -31.497284 | 150  | 3.27%  | 681.8   | 1.65%  |
| p73(p53)/Trachea-p73-ChIP-Seq(PRNA310161)/Homer           | 1.00E-13 | -31.479788 | 101  | 2.20%  | 385.6   | 0.94%  |
| 28 ANAC094(NAC)/col-ANAC094-DAP-Seq(GSE60143)/Homer       | 1.00E-15 | -34.560091 | 773  | 16.84% | 5259.3  | 12.76% |
| ANAC042(NAC)/col-ANAC042-DAP-Seq(GSE60143)/Homer          | 1.00E-13 | -32.122544 | 1343 | 29.27% | 10022.2 | 24.32% |
| 29 CRE(bZIP)/Promoter/Homer                               | 1.00E-15 | -35.09781  | 428  | 9.33%  | 2580    | 6.26%  |
| TGA6(bZIP)/colamp-TGA6-DAP-Seq(GSE60143)/Homer            | 1.00E-14 | -32.495891 | 690  | 15.04% | 4649.4  | 11.28% |
| bZIP50(bZIP)/colamp-bZIP50-DAP-Seq(GSE60143)/Homer        | 1.00E-12 | -28.218652 | 1044 | 22.75% | 7644.2  | 18.55% |
| TGA5(bZIP)/col-TGA5-DAP-Seq(GSE60143)/Homer               | 1.00E-11 | -25.538945 | 129  | 2.81%  | 602.7   | 1.46%  |
| Atf7(bZIP)/3T3L1-Atf7-ChIP-Seq(GSE56872)/Homer            | 1.00E-11 | -27.224544 | 554  | 12.07% | 3702    | 8.98%  |
| JunD(bZIP)/K562-JunD-ChIP-Seq/Homer                       | 1.00E-11 | -25.347515 | 140  | 3.05%  | 675.2   | 1.64%  |
| Atf1(bZIP)/K562-ATF1-ChIP-Seq(GSE31477)/Homer             | 1.00E-11 | -25.58905  | 718  | 15.65% | 5050.3  | 12.25% |
| TGA3(bZIP)/colamp-TGA3-DAP-Seq(GSE60143)/Homer            | 1.00E-10 | -24.103941 | 95   | 2.07%  | 402.3   | 0.98%  |
| TGA4(bZIP)/colamp-TGA4-DAP-Seq(GSE60143)/Homer            | 1.00E-10 | -25.020295 | 317  | 6.91%  | 1930.8  | 4.68%  |
| c-Jun-CRE(bZIP)/K562-c-Jun-ChIP-Seq(GSE31477)/Homer       | 1.00E-10 | -25.29452  | 362  | 7.89%  | 2262.5  | 5.49%  |
| TGA1(bZIP)/colamp-TGA1-DAP-Seq(GSE60143)/Homer            | 1.00E-09 | -22.20143  | 452  | 9.85%  | 3020    | 7.33%  |
| Atf2(bZIP)/3T3L1-Atf2-ChIP-Seq(GSE56872)/Homer            | 1.00E-07 | -17.549907 | 393  | 8.56%  | 2671.4  | 6.48%  |
| FEA4(bZIP)/Corn-FEA4-ChIP-Seq(GSE61954)/Homer             | 1.00E-06 | -14.094721 | 1225 | 26.69% | 9737.5  | 23.63% |
| 30 bHLH41(bHLH)/proB-Bhlh41-ChIP-Seq(GSE93764)/Homer      | 1.00E-14 | -34.042381 | 1899 | 41.38% | 14729.2 | 35.74% |
| bHLH74(bHLH)/col-bHLH74-DAP-Seq(GSE60143)/Homer           | 1.00E-11 | -26.10869  | 529  | 11.53% | 3531.5  | 8.57%  |
| USF1(bHLH)/GM12878-USF1-ChIP-Seq(GSE32465)/Homer          | 1.00E-11 | -27.272968 | 800  | 17.43% | 5667.9  | 13.75% |

## ASCL1\_NEUROD1\_overlap

|                                                      |          |            |      |        |         |        |
|------------------------------------------------------|----------|------------|------|--------|---------|--------|
| TFE3(bHLH)/MEF-TFE3-ChIP-Seq(GSE75757)/Homer         | 1.00E-09 | -22.924755 | 133  | 2.90%  | 654.8   | 1.59%  |
| Usf2(bHLH)/C2C12-Usf2-ChIP-Seq(GSE36030)/Homer       | 1.00E-08 | -18.8026   | 449  | 9.78%  | 3081.4  | 7.48%  |
| BIM3(bHLH)/col-BIM3-DAP-Seq(GSE60143)/Homer          | 1.00E-08 | -19.389342 | 210  | 4.58%  | 1238.2  | 3.00%  |
| E-box(bHLH)/Promoter/Homer                           | 1.00E-08 | -19.839223 | 193  | 4.21%  | 1108.1  | 2.69%  |
| bHLHE40(bHLH)/HepG2-BHLHE40-ChIP-Seq(GSE31477)/Homer | 1.00E-08 | -20.203719 | 570  | 12.42% | 4009.1  | 9.73%  |
| Cbf1(bHLH)/Yeast-Cbf1-ChIP-Seq(GSE29506)/Homer       | 1.00E-08 | -18.90347  | 415  | 9.04%  | 2810.1  | 6.82%  |
| BIM1(bHLH)/colamp-BIM1-DAP-Seq(GSE60143)/Homer       | 1.00E-06 | -14.901894 | 185  | 4.03%  | 1131.2  | 2.74%  |
| SPCH(bHLH)/Seedling-SPCH-ChIP-Seq(GSE57497)/Homer    | 1.00E-06 | -15.010235 | 1334 | 29.07% | 10631.4 | 25.80% |
| NPAS2(bHLH)/Liver-NPAS2-ChIP-Seq(GSE39860)/Homer     | 1.00E-05 | -12.530376 | 1481 | 32.27% | 12043.2 | 29.22% |
| BIM2(bHLH)/col-BIM2-DAP-Seq(GSE60143)/Homer          | 1.00E-05 | -12.202042 | 993  | 21.64% | 7842.9  | 19.03% |
| MITF(bHLH)/MastCells-MITF-ChIP-Seq(GSE48085)/Homer   | 1.00E-04 | -10.869323 | 1078 | 23.49% | 8643.8  | 20.97% |
