# Supplementary material for: Subtype heterogeneity and epigenetic convergence in neuroendocrine prostate cancer
Source: PubMed Central journal article supplement (PMC8486778; doi:10.1038/s41467-021-26042-z), 2021-10-01
Supplement: 41467_2021_26042_MOESM4_ESM.pdf [file 41467_2021_26042_MOESM4_ESM.pdf]

Supplemental Table 5. Nearest gene to the SE

| LuCaP 93     | LuCaP 145_1  | LuCaP 145_2  | LuCaP 49     | LuCaP 173.1  | EF-1         |
|--------------|--------------|--------------|--------------|--------------|--------------|
| MIR10A       | FLJ35776     | HOXB3        | HOXB3        | NFAM1        | UNCX         |
| SFTA3        | HOXB3        | ATP8A2       | PTMA         | CUEDC1       | LOC400931    |
| LOC400931    | ELF3         | FLJ35776     | TRIT1        | CABP7        | PIIF         |
| KCNK9        | LOC100130331 | ELF3         | CASZ1        | LOC400931    | C10orf91     |
| ELF3         | GALNT2       | ID2          | LOC400931    | KLHL29       | ENGASE       |
| C14orf4      | LPCAT1       | TPD52        | FAM125B      | TP73         | SLC12A7      |
| LPCAT1       | NEK2         | NDRG1        | CALML3       | KIAA0182     | C14orf4      |
| KIAA0182     | KCNK9        | FAM125B      | NFIB         | EDN2         | C14orf4      |
| NFIB         | CEACAM6      | CAPZB        | PWWP2B       | LOC441666    | C9orf50      |
| RPTOR        | LOC730227    | CUEDC1       | HOXD9        | FOXA1        | AHDC1        |
| TEAD1        | DLGAP1       | GPC6         | SFTA3        | TNRC18       | TNRC18       |
| FLRT1        | MGST2        | CBFA2T2      | PITPNM2      | MGST2        | CASZ1        |
| CXCR7        | CUEDC1       | DLGAP1       | LMO3         | LOC400548    | LYL1         |
| GAS6         | TPD52        | GALNT2       | CBFA2T2      | ELFN2        | FAM167A      |
| CDKAL1       | IRF2BP2      | SNORA14B     | CDH5         | KIAA0182     | CAMTA1       |
| FAM174B      | WISP1        | POU2AF1      | DMAP1        | LOC100130298 | CHMP6        |
| MBIP         | MICALCL      | HES1         | SLC36A4      | GINS2        | PITPNM2      |
| VAV2         | IRS2         | LPIN1        | CUEDC1       | UBE2MP1      | SREBF1       |
| CASZ1        | GPC6         | MGLL         | CBX4         | LRRFIP1      | SUN1         |
| LMO3         | EHF          | FLJ35776     | C1orf127     | BEGAIN       | NCRNA00163   |
| CCDC33       | ZNF608       | NCRNA00184   | CAMK1D       | ABR          | KRT42P       |
| FOXA1        | MALAT1       | COTL1        | FAM53B       | LHX3         | CABP7        |
| KIAA0247     | ZMYND8       | RREB1        | LFNG         | PIPOX        | C16orf78     |
| PITPNM2      | GRB7         | BCL2L1       | C14orf4      | TOB1         | CTDSP2       |
| FLJ35776     | SNORA14B     | SAFB2        | TMEM8C       | NGFR         | GAA          |
| NCRNA00051   | TMEM181      | TRIT1        | LOC100130331 | FOXG1        | AGPAT3       |
| CUEDC1       |              | LOC400931    | BMF          | NCOR2        | RPL38        |
| SIPA1L3      | HS3ST1       | LOC100131496 | ELF3         | UNCX         | DAB2IP       |
| MALAT1       | NOL4         | CCDC130      | KIF19        | CYTH4        | C14orf180    |
| CCDC88C      | COTL1        | SLC36A4      | MALAT1       | CWH43        | PCP4         |
| CAPZB        | RHOH         | LOC100131060 | LOC100131496 | FLRT1        | RTDR1        |
| SIK1         | PSMG4        | ETV6         | EHF          | SPDEF        | CRIP2        |
| CXCR7        | NCRNA00184   | NOL4         | SIL1         | ANKRD26P1    | PLCH2        |
| TSNARE1      | RBM47        | ZNF322A      | KIAA0182     | SRCIN1       | ANK1         |
| EDN2         | NOL11        | GPC6         | IRF2BP2      | LOC400548    | CBX4         |
| WNK2         | SAAL1        | PRMT8        | LOC100271832 | C14orf70     | RBFOX3       |
| LOC100271832 | MIR21        | SLC6A6       | ST14         | C14orf4      | LGALS3       |
| LOC730227    | FAM125B      | MALAT1       | MIR3186      | FAM101A      | LOC100310782 |
| SYT7         | RREB1        | LFNG         | CACNA1A      | MIR148A      | MIR548W      |
| CLDN4        | SIX1         | DSCAML1      | KIAA0182     | MIR1286      | LOC100129534 |
| C10orf91     | NACAP1       | SIX1         | ASCL1        | MCHR1        | ESPNP        |
| LOC100129066 | ANKRD46      | HOXB8        | RPTOR        | GRIK4        | ATOH8        |
| RASA3        | RFTN1        | EHF          | SAFB2        | CCDC85C      | SMCR5        |
| PTMA         | DLGAP1       | GFRA4        | C2orf55      | MIR3183      | SLC5A10      |
| CBFA2T2      | FLJ35776     | CASZ1        | C2orf144     | CRIP2        | ENPP7        |
| KIF3         | GPC6         | SYT7         | EDN2         | LOC284648    | KLF13        |
| CCDC85C      | TEAD1        | LOC100422737 | DBH          | MIR3199-1    | ACAP3        |
| CDKN1B       | DSP          | RAI14        | UTRN         | MIR634       | UNCX         |
| LIFR         | ATP8A2       | C14orf4      | DSP          | MCART1       | MIR4297      |
| NCS1         | MGLL         | SAAL1        | CEACAM6      | CLSTN1       | CCR7         |
| DLGAP1       | LPIN1        | LOC100130275 | NEURL        | LOC100499467 | DNAB12       |
| ASCL1        |              | 9-Sep ABR    | FAM102A      | MIR4297      | LOC100129034 |
| MSI2         | C14orf4      | MICALCL      | NFIC         | KDM4B        | EBF3         |
| LOC400548    | CCDC130      | INSR         | PTP4A3       | WDR25        | SRRM3        |
| WASF2        | RPTOR        | TNRC18       | MYH9         | LOC100130298 | OTOF         |
| CRIP2        | CAPN2        | CEACAM6      | REPIN1       | C16orf78     | MALAT1       |
| CMBL         | SEMA4B       | SLC37A1      | SREBF1       | FAM83F       | ABLIM2       |
| TGIF1        | LFNG         | ARFGAP2      | CLDN3        | UNCX         | MSI2         |
| ASB9P1       | GPC6         | KRT7         | GEMIN7       | NCRNA00207   | MLN          |
| RREB1        | IRS2         | HNRNPL       | LOC100289410 | RTDR1        | GRM4         |
| GTF2I        | ASB9P1       | C3orf21      | KRT8         | SYT13        | SRP9         |
| FAM178B      | C9orf106     | VPS37C       | SETD1B       | LRRTM2       | MIR3689B     |
| LOC730668    | IP6K3        | DDC          | MIR375       | TPE          | PCMTD2       |
| LHX3         | CCRN4L       | LOC730227    | C9orf106     | NCRNA00184   | RXRA         |
| SEMA4B       | TNRC18       | TGIF1        | FLRT1        | ADAMTS2      | LY6D         |
| TGIF1        | TGIF1        | MIR612       | SEC11C       | DPF1         | CEP164       |
| SLC12A7      | SATB1        | FOXJ3        | TNRC18       | KIAA0649     | C19orf29     |
| SCNN1B       | IRX2         | LGALS8       | LASS4        | WASF3        | EML1         |
| IP6K3        | SFTA3        | C18orf1      | LRRTM2       | CPLX2        | ZNF536       |
| FAM129B      | CHN2         | ADCYAP1      | LOC100130331 | UNC5B        | PVRL1        |
| ZNF750       | SIPA1L2      | C8orf75      | TNS1         | MICALL2      | FAM83F       |

|              |              |              |              |              |           |
|--------------|--------------|--------------|--------------|--------------|-----------|
| CLMN         | FAM84B       | NEK2         | SOX2         | SUN1         | LOC730227 |
| CALML5       | ST3GAL1      | NFIC         | ZBTB7B       | FGFR3        | PLEKHA6   |
| LOC100131496 | TMEM63A      | KIAA0182     | HOXA9        | PITPNM2      | IRF2BP2   |
| ZIC2         | PGBD5        | KIAA0247     | MIR378C      | MIR4311      | BAG5      |
| MBIP         | MIR1287      | ZBTB7C       | DSCAML1      | TIAF1        | C16orf78  |
| NACC2        | NEAT1        | RFTN1        | FAM69B       | ANKRD30BL    | NFAM1     |
| DDX11        | HFE2         | NUAK2        | SH3BP4       | CHST8        | ZC3H3     |
| MYT1         | LOC100499467 | SFTA3        | LAMA5        | GHRHR        | ATP11A    |
| KCNIP3       | NKAIN2       | C1QTNF3      | CA10         | HAAO         | C21orf2   |
| C2orf55      | PBX3         | RAB40C       | DDX11        | EGFR         | LOC730668 |
| CDKN2C       | LOC400931    | LOC100271832 | MEF2D        | C20orf117    | DISC1     |
| IER5         | MIR30D       | ATP2A3       | IP6K3        | 9-Sep        | SEPN1     |
| KRT8         | SLC6A5       | LOC100133612 | CLDN4        | KCNN3        | UNC5B     |
| SOX4         | DLGAP1       | SOX4         | ACTG1        | CCDC33       | RNF187    |
| LFNG         | KRT8         | NAV2         | PIM3         | LOC399744    | C14orf180 |
| BCOR         | RINL         | EPB41L4B     | HSD11B2      | PPIF         | CROCC     |
| MIR326       | OR51E2       | FBXW4P1      | THRA         | SMCR5        | FLJ43860  |
| RALYL        | C12orf42     | SH3BP4       | KRT7         | MRPS23       | KCNA10    |
| MYH9         | TEAD1        | RANBP3       | FAM129B      | GPR12        | MTSS1     |
| CALML3       | PHF19        | FAM129B      | SATB2        | TACC2        | PTMA      |
| RALYL        | IRF2         | LOC390858    | SMPD3        | ELFN1        | C20orf135 |
| LOC648987    | SPATA13      | SMARCA2      | NCRNA00051   | FAM83G       | HGFAC     |
| NFIX         | YWHAZ        | RPTOR        | NTHL1        | MYO18B       | VAV2      |
| NEAT1        | ABR          | C2orf57      | NUAK2        | PQLC2        | CUEDC1    |
| AZIN1        | RNF126P1     | SEC11C       | TLE2         | MIR152       | C14orf132 |
| NUDT14       | EPB41L4B     | PITPNM2      | LOC100128239 | SE26         | KIAA0125  |
| RBM19        | LOC648987    | SERGEF       | FBXW4P1      | FAM49B       | RFX2      |
| MICALCL      | NAV2         | C9orf106     | DAGLA        | TMEM132E     | SIK1      |
| ZNF319       | STK24        | IGFBP2       | TMEM181      | MIR1301      | MRPL37    |
| HSD11B2      | SHISA2       | ING1         | ANK2         | CDC42EP2     | C21orf33  |
| KIF26A       | GP9          | ST14         | SIK1         | LOC645752    | SOX4      |
| CD9          | LOC145837    | LOC100129066 | TFF3         | ADAMTS2      | TOB1      |
| MBIP         | LBR          | SIPA1L3      | TGIF1        | SMCR5        | CASZ1     |
| FSCN2        | NT5M         | DNMBP        | FOXA2        | C14orf4      | DRGX      |
| TRIO         | INSR         | AMACR        | PCBP1        | IRF2BP2      | PPP2R4    |
| EPB41L4B     | TMEM181      | ID2          | PROX1        | TBC1D22A     | SLC25A29  |
| MIR196B      | ID2          | DSP          | SELPLG       | A2LD1        | CACNA1I   |
| FOXJ1        | OCLN         | TEAD1        | NAT8L        | ANKRD36BP2   | ADAMTS2   |
| PLXNA1       | CALML5       | OR51E2       | NEAT1        | FAM19A5      | KCNT1     |
| 9-Sep        | CCDC33       | FGF9         | GP5          | SLIT1        | Gas6      |
| DSP          | PDE4DIP      | RAB11FIP1    | ALDH1B1      | LOC100294362 | ARHGEF19  |
| CDKN1A       | SNX16        | CA10         | SOX4         | ZNF706       | TMEM92    |
| TRIM14       | CDKN2C       | NUP210       | RREB1        | KIAA0087     | SPEG      |
| TNRC18       | SYT7         | HOXD8        | KCNK3        | ACTR3BP2     | SH2D6     |
| COPS8        | LOC100131060 | NFIB         | LOC730227    | OLFM1        | LOC150197 |
| CRB2         | NSMAF        | BMF          | SLC37A1      | C17orf54     | TSPAN9    |
| ATP2C1       | ARHGEF38     | INSM1        | BRD2         | C6orf129     | KCTD7     |
| TP73         | LOC100130275 | MIR1203      | ZC3H4        | TMEM53       | FCN1      |
| SLITRK6      | LOC284788    | IRS2         | LIFR         | ABTB1        | FAM102A   |
| BRD2         | GINS2        | DNAJC12      | SPTBN5       | PBOV1        | CAMK2A    |
| AGPAT2       | KLF3         | MYH9         | EFHD2        | LOC730668    | B4GALNT3  |
| RASD1        | PBX1         | SH3BP5       | EDN2         | GALNTL4      | FLJ45079  |
| ELFN1        | INSM1        | BCOR         | COTL1        | NEUROD2      | TBC1D16   |
| FAM102A      | MAML3        | FAM102A      | UBTF         | ALG2         | FOXN3     |
| NPTX1        | MIR135B      | ATP2C1       | HES6         | LRP5L        | FMOD      |
| CCDC33       | ATP11B       | MEF2D        | ZIC5         | TPRG1        | IQSEC1    |
| KLF13        | SIPA1L2      | PPAP2C       | HDGF         | IGLL1        | LOC730441 |
| KIF19        | MIR23B       | FAM174B      | SCNN1A       | LHX2         | CROCCP2   |
| TNS1         | CBFA2T2      | ETS2         | ABTB1        | WASF2        | KLHL29    |
| AHRR         | MBNL2        | FNDC3B       | MIR3621      | MIR148A      | C1orf198  |
| IRF2BP2      | SGPL1        | MGST2        | LOC730668    | SCARB1       | PSD2      |
| S100A2       | RASSF5       | TCERG1L      | C6orf35      | RASD1        | TBC1D22A  |
| TMSB4X       | FOXA1        | CAPN2        | NOL4         | LOC574538    | CBX4      |
| SOX2         | NUDT12       | LASS4        | KLHL29       | TMEM115      | ALOX15    |
| ARHGEF16     | KIAA0182     | TM4SF1       | PPAP2C       | LOC282997    | TPPP      |
| LOC284648    | NEDD1        | SDC1         | ARHGEF2      | TCP11        | LRTM2     |
| ABR          | ATP2C1       | CCDC40       | LPIN1        | C14orf23     | SYT2      |
| KLF13        | ACP6         | INSM1        | C16orf91     | MIR378C      | MIR657    |
| CEACAM6      | COL4A2       | LOC643406    | MIR3188      | C5orf15      | OTUB1     |
| POU2AF1      | ENPP6        | C1QTNF3      | MYOF         | C7orf41      | COL5A1    |
| COTL1        | GFRA4        | COMP         | CCDC88C      | BMPER        | LOC400238 |
| FOS          | SERGEF       | CHD6         | FOXP4        | SREBF1       | NOTCH1    |
| ABHD11       | IER5         | CNKS3        | RAB11A       | FAM102A      | STRA13    |

|              |              |              |              |              |              |
|--------------|--------------|--------------|--------------|--------------|--------------|
| C14orf182    | TNFSF8       | NT5M         | LENG9        | TSPAN18      | LOC283177    |
| ETV6         | PLXNA1       | UTRN         | IL17REL      | EDN2         | PHACTR3      |
| SIL1         | SOX4         | VAV2         | NCRNA00245   | ZC3H3        | RAPGEF1      |
| LENG9        | AFAP1        | C7orf41      | UCP2         | AIPL1        | PLXNA4       |
| BMF          | CLIC1        | FAM190B      | RANBP3       | INSM1        | SIM2         |
| TERF1        | SLC6A20      | LMO3         | LOC100129427 | REV1         | MGAT4A       |
| LOC100272217 | PITPNC1      | ST18         | LOC283335    | TDRG1        | ATP6V0E2     |
| INSM1        | SAT1         | KRT8         | NCRNA00184   | PCSK9        | KCNJ18       |
| C14orf132    | KIAA1530     | KIAA0087     | TEAD1        | KRT15        | MAD1L1       |
| ST18         | ID1          | BCOR         | FOXJ3        | KCNK16       | C22orf34     |
| PSMB1        | DNMBP        | MBIP         | NEK2         | UNCSA        | MIR629       |
| FAM53B       | ASCL1        | KCTD1        | C20orf112    | LOC100132354 | BCL11B       |
| TBCC         | ATP13A3      | MIR21        | LOC100130894 | CEBPG        | TP73         |
| ISLR2        | FOXJ3        | SIPA1L3      | DLL4         | ANGPT1       | RHOF         |
| SMAD7        | RAB11FIP3    | PGBD5        | GPR37L1      | C9orf50      | AFAP1        |
| DUSP16       | TRIB1        | RET          | LOC100128788 | SLC35C2      | YWHAZ        |
| C1QTNF3      | SHISA2       | GRB7         | GP9          | MIR589       | LOC400238    |
| HSD17B6      | SUMO1P1      | CCDC162      | HS6ST1       | CPLX2        | MKI67        |
| HES1         | MIR375       | NCRNA00184   | PRR15L       | MIR135B      | NEUROD1      |
| BCOR         | NR4A2        | FAM178B      | ACTB         | ITPRIP       | TRIOBP       |
| NEK6         | DCAF4L2      | CLDN3        | SOX13        | NCRNA00051   | CCDC33       |
| LOC400238    | WEE1         | AFAP1        | ZMIZ1        | NFIB         | MAP2K3       |
| GRHR         | S100A11      | CDKN2C       | BCOR         | ADAM6        | LSP1         |
| GADD45G      | GRHL2        | PGM2L1       | RUNX1        | NAA11        | KREMEN1      |
| KIF26A       | ZFAT         | C2orf55      | CAPRIN1      | C5orf15      | EIF2C2       |
| IMPA2        | RALYL        | ARHGFE38     | ZFH3         | C18orf1      | ANK1         |
| LOC284751    | LOC390858    | EDN2         | NR4A2        | MED27        | LOC440926    |
| MARK2        | ABHD11       | PCBP1        | MIR1227      | LOC642236    | MICALL2      |
| C14orf181    | MYT1         | PBOV1        | MAML3        | OLIG3        | AZIN1        |
| NTHL1        | SPPL2B       | SEMA4B       | CRIP2        | CCR7         | SHANK2       |
| KRT7         | C2orf57      | CDON         | DUSP22       | LOC400548    | PTP4A3       |
| COMP         | IL24         | SRP9         | HNRNPF       | ADARB2       | C9orf69      |
| ZMIZ1        | B4GALT5      | MIR23B       | HNRNPU       | CHN2         | COL9A2       |
| SRSF3        | HOXD8        | ST6GAL1      | SCOC         | TBC1D16      | CACNA2D2     |
| TPD52        | C20orf144    | SLC4A11      | SPPL2B       | MYH9         | C14orf70     |
| TS22D2       | FLT1         | NCRNA00111   | SBNO2        | NCOR2        | CIC          |
| C1QTNF3      | GRHL2        | SATB1        | CDH1         | NRXN1        | NHLH1        |
| ADCYAP1      | LOC100133612 | RASA3        | DLEU2        | C8orf46      | INSM1        |
| YKT6         | CACNA1C      | TCF12        | LOC100129066 | TRPM8        | CRHR2        |
| LOC100133545 | INSM1        | ASCL1        | KIAA0240     | SH3TC1       | FLJ43860     |
| FLJ35776     | NUAK2        | ASB9P1       | MED25        | C18orf1      | MIR1275      |
| C14orf180    | ZBTB7B       | LOC100133612 | CTBP2        | FAM174B      | ELF3         |
| MIR23B       | LOC100133545 | LOC283050    | PLXNA2       | EBF3         | ELFN2        |
| UTS2R        | SCOC         | LOC100130331 | FLT1         | KLHL29       | ZMIZ1        |
| KCNK5        | PGS1         | HS3ST1       | CXC5         | ADSS1        | ARL16        |
| C2orf85      | MSI2         | PLXND1       | SH3TC1       | ROCK1        | CTTN         |
| NCRNA00051   | CDH5         | SIK1         | LOC283663    | TARBP1       | PSMB1        |
| CHSY1        | COL21A1      | FOXA1        | MIR937       | GPR132       | C14orf162    |
| GLRX3        | GPC6         | AACS         | BCL2L1       | IGSF21       | DMRTB1       |
| GPRC5C       | BCOR         | TNFSF8       | HOOK2        | ASB9P1       | TIMP2        |
| CTBP2        | TMEM30B      | KIAA0182     | SMARCA2      | HIC1         | TMEM121      |
| COP58        | KIAA0240     | TOB1         | ACSM2B       | LOC100129066 | NAV1         |
| DACH1        | SLC37A1      | LOC338799    | MGST2        | CNTN2        | LOC100132707 |
| SETD1B       | BMF          | LRIG1        | LOC100130298 | FBLN1        | TPPP         |
| HS6ST1       | SCNN1B       | FOXP4        | SNCAIP       | BEGAIN       | B3GNT7       |
| MACF1        | PPAP2C       | C11orf92     | MIR326       | ROR2         | LHX3         |
| SOX4         | LASS4        | RALYL        | FOXA1        | ANKRD46      | ZFAT-AS1     |
| LOC221122    | ADCY9        | LOC283663    | SPEN         | FAM125B      | MYT1         |
| BAIAP2       | SEC16B       | PDGFRL       | PDE4DIP      | MYO18B       | CELF4        |
| EFHD2        | ZC3H4        | C1orf127     | ID2          | TRIM29       | KDM6B        |
| MAL          | RAB20        | PSMG4        | C12orf44     | SEZ6L        | GEMIN7       |
| RET          | HIST2H2BE    | NFIA         | MFS10        | TSPAN9       | SDK1         |
| ADAM6        | TLE2         | FBXO32       | GPR84        | CDH17        | GTF2I        |
| NCRNA00184   | IER2         | RALYL        | SIK1         | CAMK2B       | C13orf35     |
| PSD4         | LOC100129066 | MGLL         | MDC1         | PLXNA1       | BCOR         |
| ID4          | GPC5         | ID4          | C21orf29     | C14orf70     | CORO2A       |
| ProSAPIP1    | HOXB8        | RASSF5       | TUBA1A       | IMP5         | LOC282997    |
| PRKCD        | ATP7B        | LOC145837    | SNORA14B     | SYNPO        | INF2         |
| C1orf127     | MIR759       | TARBP1       | GTF2I        | VSTM2L       | FSCN1        |
| MDC1         | RIMS2        | MIR135B      | BCOR         | NEUROD2      | CRYBB3       |
| YWHAZ        | ANKRD10      | RARA         | C10orf108    | MIR4311      | BAT2L1       |
| CBFA2T2      | PRAC         | EFHD2        | ID2          | GSDMC        | FAM131C      |
| INSL5        | FLJ13197     | C12orf42     | KLF6         | TMPPSS15     | C14orf180    |

|              |            |              |              |              |              |         |
|--------------|------------|--------------|--------------|--------------|--------------|---------|
| C16orf81     | RAPGEF5    | MIR196B      | C1orf152     | NCRNA00051   | TMEM53       |         |
| BCL2L1       | ADCY5      | ARL4C        | HK1          | VAPA         | PPP2R2C      |         |
| PRDM6        | SIL1       | HOXB1        | CEP164       | CWH43        | SLC19A1      |         |
| C14orf180    | PTP4A3     | TMSB4X       | INSM1        | CA8          | TBC1D22A     |         |
| BCR          | TFCP2L1    | DMAP1        | LOC100131060 | MDM1         | ADCK1        |         |
| GRAMD4       | BCOR       | UNQ6975      | C19orf61     | MIR4251      | KIAA0182     |         |
| GPR84        | BAALC      | TBL1XR1      | AHDC1        | MPRIP        | TESC         |         |
| AMOTL2       | C12orf42   | MYOF         | MIR4310      | LOC148189    | CHST3        |         |
| NT5M         | DUSP6      | SYDE2        | TEAD1        | KLF13        | PLXNA4       |         |
| C12orf44     | GABRG3     | TEAD1        | LIMS1        | GPR12        | RTN4RL1      |         |
| KCNK16       | PRKAB1     | CLDN4        | CPA1         | MRM1         | KCNQ3        |         |
| ARAP1        | CHRNA9     | PPP1R3B      | RET          | LOC100130298 | PGBD5        |         |
| LPIN1        | NOS1       | LOC100130331 | IGFBP5       | VWC2         | EDN2         |         |
| ZFHX3        | LGALS8     | STEAP3       | CDC25B       | SCGN         | NEAT1        |         |
| ZBTB7C       | LOC440926  | RHOH         | GRP          | ECE1         | MIR601       |         |
|              | 9-Sep      | SIPA1L2      | LOC100133545 | SIPA1L3      | RNF19A       | CXCR7   |
| ISYNA1       | ATP1B1     | TBC1D8       | HNRNPL       | KCNMA1       | NFE2L1       |         |
| SPEN         | HOXB1      | ZBTB7B       | NOS3         | PRKD1        | E2F2         |         |
| BAI1         | CSRNP3     | SAT1         | ZP1          | CDKAL1       | MIR589       |         |
| TERT         | LOC399881  | CDKN2A       | CCDC40       | SEC16B       | ARHGEF16     |         |
| LOC283050    | TMEM150C   | LPCAT1       | SGMS1        | LRRN2        | OLFM1        |         |
| STEAP3       | CRIP2      | KCNK9        | GALNT2       | QSOX2        | C4orf23      |         |
| C1orf89      | SLC26A9    | RASSF6       | MPG          | LOC100130275 | GPR153       |         |
| IDH2         | ZBTB7C     | CLDN10       | MAML3        | ARL4C        | ADCYAP1R1    |         |
| ZNF217       | TRAPPC9    | LOC100499467 | LRIG1        | RAP1GAP      | SYPL1        |         |
| NAV2         | CRTC1      | TH           | TARDBP       | CHST15       | LMAN1L       |         |
| MIR3664      | PCDH1      | FOXJ1        | UBOX5        | DAND5        | KLF9         |         |
| EZR          | CLDN4      | MYRIP        | MAZ          | HK1          | MIR152       |         |
| LYPD1        | EEA1       | SNORA70E     | GNG4         | MIR593       | C4orf44      |         |
| TBC1D24      | NCRNA00051 | DLGAP4       | EFR3B        | KLK3         | TTYH3        |         |
| MLN          | PTMA       | RAPGEF5      | OPA1         | INSM1        | MAFF         |         |
|              | 9-Sep      | FOXP2        | TSPAN14      | MIR3605      | HOXA7        | MIR4253 |
| RARA         | ID2        | HOXD11       | ARAP1        | MRPS27       | OLIG1        |         |
| PEX5L        | FAM84B     |              | EFCAB2       | NRXN1        | C1QA         |         |
| TREM1        | INTS7      | KIAA0430     | POU3F2       | MIR770       | KIAA0125     |         |
| C6orf129     | FAM135B    | SOX13        | ANXA2        | ITPKB        | NAPA         |         |
| IER2         | INPP4B     | RFX3         | RBM38        | NFIB         | PRELP        |         |
| SEPN1        | REPIN1     | KCNQ1DN      | GPR56        | ARHGEF3      | WNK2         |         |
| CDON         | MACF1      | NR4A2        | C20orf203    | MIPOL1       | VGLL4        |         |
| PRR20E       | CHRAC1     | LOC283335    | INPPL1       | CACNA1A      | MSI2         |         |
| KIF26A       | FLJ45079   | PRAC         | SLC6A5       | WBSCR17      | FAM53B       |         |
| TPSD1        | POU2AF1    | YWHAZ        | ATP2A3       | FLJ13224     |              | 9-Sep   |
| LOC100216545 | SH3GLB1    | CNKSR3       | C10orf140    | BAG5         | CLSTN1       |         |
| SIX1         | CCR8       | MIR193B      | UNC13D       | VASH1        | ADAMTS2      |         |
| ZC3H4        | HIST1H2BD  | MCHR1        | ETV6         | ST18         | C14orf93     |         |
| UBTF         | TRAK1      | KCNK5        | HOXC6        | ADAMTS2      | DAND5        |         |
| FOXP4        | PLXNA2     | PHC2         | KIFC3        | KIAA1614     | RBFOX3       |         |
| MIR1         | MIR23B     | TERF1        | CAPN9        | FSCN1        | MIR2278      |         |
| ZC3H3        | IMPA1      | RTN4RL2      | RNF187       | ADCYAP1      | CDH22        |         |
| RGS12        | SLC30A8    | ADCY5        | TPD52        | CROCC        | GRIN2C       |         |
| B3GNT8       | TRIM14     | CPLX2        | CBX3         | LOC284749    | ADAM12       |         |
| PCBP1        | FAM174B    | ANKRD46      | SEMA4C       | PLXNA2       | BGN          |         |
| PIGZ         | GEMIN7     | SDC4         | LOC100499467 | HTRA1        | HOOK2        |         |
| NUDT16L1     | CAPN9      | MBNL2        | LYL1         | SETD1B       | USP2         |         |
| MIR1178      | GPRC5C     | ZNF706       | NUAK1        | NAV1         | NGFR         |         |
| PTPRJ        | TRAF3IP2   | CCRN4L       | ADCY5        | WBSCR17      | COL22A1      |         |
| ECE1         | MYH9       | LOC100132354 | KDM4B        | MAT2B        | MIR4269      |         |
| FAM125B      | ANK2       | TERF1        | MIR21        | C7orf71      | KLHL29       |         |
| FLJ45079     | TRIT1      | ATP8A2       | WDR34        | BEGAIN       | DUSP7        |         |
| C14orf180    | SOX2       | TRAK1        | REV3L        | KCNK9        | BEGAIN       |         |
| FLJ22536     | C1D        | XPB1         | DLL1         | MIR2117      | RXRA         |         |
| DEGS2        | UTRN       | TLR5         | SLC25A42     | CCDC33       | LOC730441    |         |
| PLEKHG4B     | LOC338799  | HOOK2        | IER2         | RFX2         | EMP3         |         |
| LY86-AS1     | PCBP1      | TRAF3IP2     | LOC390858    | LOC643955    | NCS1         |         |
| SPPL2B       | ERI3       | MCART1       | TAGLN2       | PVRL1        | GRAMD4       |         |
| SLC7A5P2     | ERN1       | PHLDB1       | CCL28        | CHRN4        | DAGLA        |         |
| ASB2         | SLC30A8    | KLF13        | LOC644172    | DNAH9        | RNU6ATAC     |         |
| KCTD1        | ZNF217     | PLXNA1       | TRIM8        | LBR          | NPTX1        |         |
| KLHL30       | PROX1      | GEMIN7       | HSPB1        | GPR12        | EFNA3        |         |
| ZNF775       | LNK1       | LOC284648    | GREB1        | HPCAL1       | LOC100129066 |         |
| MIR578       | TOB1       | RBM47        | DNAJB12      | CDHR3        | DLX4         |         |
| CBX8         | RPTOR      | MIR1         | FBXO32       | CHD9         | LRRC47       |         |
| ESPMP        | RNF19A     | CCDC88C      | TRAF3IP2     | CCDC88C      | MSI2         |         |

|            |           |              |                 |              |              |
|------------|-----------|--------------|-----------------|--------------|--------------|
| PGS1       | SNX16     | LOC100499467 | SRM             | DMBT1        | ARFGAP3      |
| LGALS3BP   | SH3BP5    | RALGAPA2     | SMYD3           | ALOX5AP      | MRPS12       |
| PYGB       | AJAP1     | PLA2G6       | C12orf42        | TLE6         | MYBPH        |
| LRIG1      | PITPNM2   | IFNGR2       | TUBB2B          | FAM201A      | MICALL2      |
| SH3BGR13   | GTF2I     | SCNN1A       | CTDSP2          | DNAJB12      | LOC100130894 |
| TFCP2L1    | CCDC88C   | TMEM181      | ENTPD2          | CPA5         | TIFAB        |
| LOC401109  | ASXL3     | LOC100126784 | JUN             | MIR200B      | ZFP36L2      |
| TMEM30B    | HIST1H2BC | ADCY9        | ABR             | SARDH        | MIR601       |
| SUMO1P1    | EIF2C2    | PPP1CB       | FKBP2           | GTF3C4       | INTS1        |
| SNORA14B   | FAM178B   | RAB20        | ACP6            | KCNMA1       | C20orf20     |
| SLC45A4    | MEF2D     | COL4A1       | FAM174B         | LOC648987    | B3GALT5      |
| CKB        | SLC6A5    | EGFR         | AZIN1           | SCARB2       | ARHGAP12     |
| SLC25A47   | BRD2      |              | 9-Sep<br>RNF19A | BCOR         | GFPT1        |
| C20orf144  | GOLGA7B   | LOC200261    | ZFAT            | BAGE4        | HHAT         |
| RHBD1      | FAM49B    | RCAN1        | HOXB8           | PTP4A3       | KIF19        |
| MIR595     | RFX2      | RFX2         | KLF13           | SH2D6        | LOC338799    |
| BAT2L1     | AMACR     | BHLHE40      | ZBTB20          | KCNJ11       | GPRC5C       |
| WEE1       | DEPDC6    | BRD2         | TRIM47          | HGS          | NEK6         |
| C10orf140  | LRP11     | ID1          | APOLD1          | PRSS55       | C15orf50     |
| CLIC1      | GTF3A     | PBX1         | CDKN2C          | ITPKB        | VPS28        |
| SDC1       | NTHL1     | IER2         | MIR3935         | PLXNA2       | AKR7A2P1     |
| PROX1      | FOXB1     | CALML5       | SH2D6           | FAM53B       | NANOS3       |
| MAPK13     | RUNX1     | TGIF1        | RCOR2           | LIMS1        | RPLP0P2      |
| HES6       | RGS12     | APOLD1       | PLEKHH3         | GRIN2C       | KCNH6        |
| MIR193A    | LRRC43    | UNQ6975      | TSNARE1         | LOC100499467 | NAPG         |
| ST18       | ATP2A3    | TBCC         | LOC400548       | ITGA3        | THRA         |
| HSPB1      | MYRIP     | FOXN3        | CACNA1C         | C18orf1      | WDR25        |
| CHN2       | GRP37L1   | TERF1        | CROCC           | EMX2O5       | TMEM200C     |
| RPS24      | LAPTM4B   | CD9          | ATP1B1          | KCNH2        | TRIM62       |
| ATXN7L1    | DUSP10    | SPEN         | DUSP5P          | SCOC         | STX16        |
| TMEM52     | RAB4A     | LIMD1        | PCDH1           | ZEB2         | SLC9A3R1     |
| CACNA1A    | LRIG1     | RASA2        | TUBB2C          | KLF13        | HVCN1        |
| MIR1471    | CPA1      | GRHL2        | SLC29A4         | C16orf78     | PACSIN2      |
| VAMP3      | SLC7A11   | ASXL3        | TOX             | FAM109A      | CSNK1D       |
| FAM100A    | CNKSR3    | FGF9         | HOXC9           | KCN52        | PCBP3        |
| AFAP1      | RMST      | MTSS1        | PBX1            | LMO1         | BCR          |
| NKPD1      | NFIB      | ATP13A3      | ST18            | OR11H12      | QSOX2        |
| RUNX1      | CASZ1     | CLIC6        | LRRC43          | C22orf34     | ACTL7B       |
| HOXB1      | KLHDC4    | KCNQ1OT1     | UNC5A           | GLOD4        | BCL11A       |
| MIR1275    | C12orf66  | TPD52        | VAV2            | KR78         | FLNC         |
| LOC388630  | MIR23B    | C20orf144    | CCRN4L          | PRSS55       | FGD2         |
| PTP4A3     | ZNF710    | MIR1287      | STOML1          | PTMA         | ATP1A1       |
| PLAC2      | KALRN     | SOX2         | CXXC4           | TLE2         | MIR4296      |
| SCOC       | ABCC4     | FOXA2        | CDON            | TSPAN9       | IER2         |
| PPIF       | VAPA      | SLC26A9      | H3F3B           | LOC100129534 | LHX3         |
| CLPTM1L    | CD9       | NACAP1       | NCS1            | CORO2B       | RPTOR        |
| CCRN4L     | VPS37C    | RUNX1        | FGF9            | TPTF         | JMID4        |
| MIR135B    | MIR23B    | NEDD1        | SPDEF           | MYLK         | FZD6         |
| HIST1H2BD  | TPD52     | CPA1         | ATP2C1          | TMEM200C     | TPCN1        |
| CPA1       | FUZ       | NEURL1B      | TRIB1           | TSHR         | ITPKB        |
| NCOR2      | NHEG1     | TMEM184B     | HES1            | NEUROD4      | LHX1         |
| LOC646903  | MARK1     | MKNK2        | TNFRSF13C       | MICALCL      | TSSC1        |
| INSR       | ZNF486    | MTUS1        | SDC4            | LOC100130581 | MIR3201      |
| C6orf195   | MKL2      | GBAS         | MCL1            | UNC5A        | MGMT         |
| CHMP6      | COL22A1   | UBOX5        | ANP32B          | TSPAN18      | NAV1         |
| NCRNA00051 | C1orf127  | ITGB8        | MUC1            | MIR4311      | SARDH        |
| CROCC      | MIR326    | STK24        | TFEB            | VAV2         | USP12        |
| C17orf70   | ZBTB20    | RNF126P1     | WWC1            | NRP2         | STH          |
| VPS37C     | C10orf40  | DUSP6        | VPS37C          | FAM174B      | PXN          |
| UMODL1     | ETV1      | GTF3A        | FLJ45079        | ENPP7        | KCNMA1       |
| MARCKS     | KIAA0430  | REPIN1       | MLLT6           | HPCA         | LOC154449    |
| ETV6       | DPF1      | CYB5A        | RRBP1           | MIR601       | NPTX1        |
| CHMP6      | RIT2      | CAPN9        | MGAT4A          | GUSBP4       | KCNK9        |
| MIR551A    | ESRRG     | GOLGA7B      | HIST2H2BE       | EMP3         | LOC100131199 |
| NPHP4      | ARFGAP2   | PHF19        | SATB1           | DAGLA        | ARHGAP23     |
| HIST2H2BE  | LMO3      | MIR1178      | TMEM209         | GIT1         | MEX3A        |
| MEF2D      | PIM3      | NWD1         | C6orf35         | RAI1         | NRP2         |
| TOB1       | HES1      | TCTEX1D1     | TBC1D8          | FLJ42392     | PRSS55       |
| NDUFA4L2   | SEMA5B    | DDX11        | NFIA            | EFNA5        | GMPPA        |
| TOX        | TRPM8     | DLG5         | LOC400940       | SYNJ2        | GLOD4        |
| MIR200C    | EDN2      | GPC6         | STX16           | NEURL        | MCFD2        |
| MIR4251    | ARL4C     | MAML3        | ID2             | FAM129B      | MIR3199-1    |
| OCLN       | XKR9      | EPCAM        | CTDSP1          | ROR2         | C12orf44     |

|              |            |           |              |              |            |
|--------------|------------|-----------|--------------|--------------|------------|
| ARID2        | FAM102A    | RIMS2     | LOC100271722 | NCAM1        | SLC37A1    |
| SMUG1        | ATP8A2     | KIF5C     | BCAT2        | TSPAN15      | LGALS3BP   |
| FAM84B       | PCGF2      | TSPAN11   | CDKL1        | TMEM121      | PMS2P3     |
| CMIP         | XBP1       | FURIN     | PHLDB1       | FRG2C        | UNCX       |
| EMP3         | MIR193B    | TM4SF18   | UNQ6975      | KLF13        | C21orf125  |
| TPCN1        | LPIN2      | SAMD13    | WHSC1        | CHST3        | SLA        |
| C20orf112    | DPYSL3     | HK1       | KCNA5        | IER5         | PIAS4      |
| CDC25B       | BCL2L14    | FLJ13197  | MICALCL      | BMF          | BCL7A      |
| LIPC         | ENAM       | PROX1     | FAM178B      | NPTXR        | NEURL1B    |
| PCDH1        | SRP9       | SYN2      | GRHL2        | RAMP1        | FAM38B     |
| SLC46A1      | CPD        | NEURL     | ARID1B       | LOC100133985 | LRRN2      |
| C17orf62     | PBOV1      | ADM       | KLF10        | DNMT3A       | CERK       |
| NOTCH1       | NCRNA00295 | CEACAM3   | MIR548T      | NSMAF        | MIR183     |
| LOC100126784 | FABP7      | UBC       | ENO3         | C7orf16      | PTK7       |
| TFCP2L1      | PLAC2      | COBL      | TSC22D1      | CCRN4L       | CDKN2C     |
| LOC100130581 | GABRG3     | C8orf86   | GRIA1        | TRIM62       | WSB1       |
| PGF          | TOX        | EDN2      | LAG3         | CSNK1D       | ISLR       |
| PPP1R10      | RAB20      | FAM84A    | FOSL2        | MIR147       | EFCAB4B    |
| DMRTA2       | HOOK2      | RERE      | FBLN7        | ARHGAP12     | RBM38      |
| VASN         | NROB1      | C14orf132 | RASA3        | PODXL        | ANGPTL2    |
| JUN          | MYOF       | PIK3R4    | LOC149950    | APOL4        | KCNAB2     |
| TACC2        | CBFA2T2    | TLE2      | CLIC1        | SPSB4        | ZAP70      |
| LOC100133612 | GLUL       | SCN3A     | ZC3H7A       | SLC6A9       | NCRNA00051 |
| STIP1        | LOC284648  | ICA1      | SIL1         | TNP1         | TESC       |
| PTCH1        | PBX3       | CCDC6     | TACC2        | TMEM121      | VAMP3      |
| BCL2L14      | PAX9       | PSD3      | NUDT14       | CALML3       | RNF213     |
| LITAF        | RUNX1      | CDH5      | ZBTB7C       | BCL11B       | TMEM121    |
| RIMS2        | GLT1D1     | SAMD13    | KIF26B       | GIN52        | FOXD2      |
| ING1         | TERF1      | TRIB1     | UBE2I        | MIR4319      | DUSP1      |
| FAM134B      | MSI2       | ZNF704    | NR2F1        | ZNRF2        | MAP3K14    |
| MIR4290      | RASSF10    | SEC14L1   | ARID2        | RPS24        | CXXC5      |
| TMEM115      | KCNK9      | ATP9A     | SETD5        | BOD1         | CASZ1      |
| LY86-AS1     | SUMO1P1    | CRIP2     | KCNQ1DN      | RGMA         | C14orf49   |
| C9orf129     | C1orf100   | LRRCA3    | NRXN1        | PPP1R13B     | MGC23270   |
|              | 9-Sep      | CCL28     | GSK3B        | RAB12        | NCRNA00221 |
| TRAPP9       | PELO       | INPP4B    | PHF2         | FRG1B        | CORO1C     |
| MRPS23       | MRPS28     | SMPD3     | LMNA         | IGFBPL1      | HS1BP3     |
| VPS37B       | FBXO32     | RNF183    | RF3          | FAM13C       | CAMKK1     |
| WDR34        | CHGA       | FAM46A    | CDC34        | VEZF1        | MIR4284    |
| MAML3        | GXYLT1     | RAI1      | CAPN2        | KCNQ1DN      | WBSCR17    |
| LOC283070    | SYTL3      | ST18      | B3GNT5       | RALGAPA2     | FOXN4      |
| RERE         | INSC       | ANKRD10   | MGC16025     | CPLX3        | DL4        |
| BEGAIN       | NCR2       | SMOC2     | NDUFS8       | SLC2A9       | RALGDS     |
| CAMK1D       | MIR592     | GPR37L1   | B3GNT8       | NISCH        | CAPN9      |
| LOC282997    | HIST1H2AK  | C10orf91  | CCDC33       | ENPP7        | KCNJ4      |
| SHANK2       | SDC1       | UAP1      | ASXL3        | C14orf23     | KLF13      |
| KLRK1        | ANKRD46    | HDFG      | TRAF2        | EGFL7        | MLLT6      |
| C1orf95      | PIK3R4     | ZC3H4     | ZBTB7A       | SLC12A7      | PIK3C2B    |
| HIST1H2AC    | TOX        | CBX8      | DNASE1L2     | HES1         | CROCCP3    |
| ATP1B1       | BCL2       | B3GNT2    | CHAD         | CECR1        | SPSB4      |
| RAP1GAP2     | LOC283663  | B3GNT8    | RUNX1        | KCNK9        | GNAL       |
| TMEM53       | AZIN1      | IL24      | WEE1         | INSM1        | PTPRF      |
| GOLGA7B      | MLL5       | SCARB1    | ASB9P1       | DPF3         | SEMA3F     |
| RAD23B       | CD44       | CLIC1     | CHD4         | DCAKD        | SNORA11B   |
| SLCO3A1      | CDC25B     | MACC1     | RPL10A       | GTF3A        | C18orf1    |
| RUNX1T1      | REEP3      | TBL1XR1   | ARFGAP2      | TSPAN5       | ACE        |
| NET1         | CDKN1B     | LY86-AS1  | C2orf85      | SEMA5B       | GPR132     |
| KIAA0649     | ATP11B     | CDKN1A    | C11orf63     | PSD2         | BAHCC1     |
| FAM84B       | IRF2       | ZNF704    | SPIRE2       | NINJ2        | LIMK1      |
| MIR1203      | MIR3170    | GSN       | IGFBP5       | ZMYND8       | BCOR       |
| AQP9         | FAM46A     | C12orf42  | NBPF14       | KIAA0802     | HEXIM1     |
| TXNIP        | ST18       | MDC1      | TMEM61       | NEUROD4      | ASB2       |
| AMACR        | PTMA       | MARK1     | EBLN2        | TMEM196      | LOC642852  |
| C3orf58      | ZFH3       | IP6K3     | NACC2        | MIR216B      | ZNF423     |
| MRPS10       | IGFBP2     | OR1M1     | AFAP1        | KRT42P       | SH3TC1     |
| GRHL2        | COX6C      | ATP7B     | ESPYP        | APOBEC3A     | SORCS2     |
| GAA          | SIPA1L2    | GP9       | RIT2         | RHBDL3       | EBF1       |
| MIR620       | FBXW7      | JUN       | BCL9L        | LPHN2        | HSPA9      |
| CNGB1        | FABP5      | WEE1      | VSTM2B       | KLF13        | PGS1       |
| NUAK2        | FAM135B    | PGPEP1L   | PFKP         | ZFPM2        | 9-Sep      |
| EGFL7        | PLA2G6     | ABTB2     | MARCKS       | FAM163B      | HOXD11     |
| ATP2A3       | CHMP6      | KIAA1324  | TLE6         | LOC221122    | 10-Mar     |
| ZBTB7B       | MIR601     | ZNF219    | HIST1H3B     | FLJ42392     | LOC574538  |

|              |              |              |              |              |               |
|--------------|--------------|--------------|--------------|--------------|---------------|
| BAG5         |              | CTDSPL       | BEGAIN       | ZFAT-AS1     | RAP1GAP2      |
| SFRP1        | PROM1        | NCOR2        | IDH2         | C10orf108    | CLDN5         |
| NDUFS8       | AACS         | ARHGEF2      | SAMD13       | RASEF        | RHBDL3        |
| MCHR1        | MGC87042     | CA4          | UBC          | PPM1F        | SLC25A1       |
| FAM83H       | EPHX1        | ATP5O        | AHNAK        | PLXNB2       | FNDC5         |
| LOC400548    | SYCE2        | CSRP1        | MIR23B       | SGMS1        | TTC15         |
| ODZ3         | MACC1        | C20orf112    | CCDC12       | TUBA1A       | NCOR2         |
| RERGL        | EXT1         | ARSJ         | KCNK9        | TP53I11      | KIAA0649      |
| SCNN1A       | ERRF1        | SLC30A8      | NAV2         | TMEM209      | NDUFB7        |
| GRIK3        | SCG2         | C9orf152     | NUDT16L1     | FAM105A      | RPL38         |
| GLIS2        | SPEN         | LRP4         | ACSF3        | NHLH1        | MIR3183       |
| PRKAR1B      | XYLT1        | PPAP2B       | NPHP4        | PEPD         | ALOX5AP       |
| VAMP3        | NRXN1        | STAG1        | RERE         | C9orf106     | ANKRD30BL     |
| PPP1R13B     | OSTCL        | WIPI1        | SLC6A6       | HIVEP3       | PIGT          |
| RAB40C       | TLE6         | SHISA2       | TFCP2L1      | EPHA4        | MIR656        |
| CAPN9        | SLC38A11     | NHEG1        | MIDN         | C11orf92     | ZC3H12A       |
| RINL         | TACR2        | AMIGO2       | PCGF2        | PRDM11       | CBX8          |
| MIR4290      | CHD6         | LOC442421    | B3GALT5      | SLC17A6      | CLPTM1L       |
| TSPAN14      | CTDSP2       | B4GALT1      | FLJ35776     | GPR153       | PHACTR3       |
| HOOK2        | C13orf29     | LOC440926    | HSPA8        | TRAF3IP2     | DENND3        |
| ZBTB7A       | FOXP2        | PITRM1       | LZTS2        | DSCAML1      | FOXA1         |
| MGC16025     | BCR          | RIMBP2       | PKD1         | BICD1        | LOC100132356  |
| ACSBG1       | LIMCH1       | LOC100128023 | FLJ35776     | IGFBP5       | TSPAN11       |
| AES          | ZBTB7C       | GADD45A      | ERBB2        | CHN2         | KCNMA1        |
| ZIC5         | SLC7A5P2     | GREB1        | TSPAN11      | DIRAS3       | FKBP5         |
| SCNN1G       | SYNJ2        | CBX3         | SCGN         | SOX9         | FZD1          |
| LRRC33       | SEPW1        | SLC1A3       | TERT         | TNFAIP8      | CRABP1        |
| PCGF2        | SPIRE2       | MCF2L        | CMBL         | ADCK1        | SLC9A1        |
| DEGS2        | RNF183       | MIR326       | RGS12        | FAM19A5      | TBCC          |
| CACNA2D2     | TLE3         | SCOC         | HCFC1        | SIPA1L3      | KCNC4         |
| MIR3188      | TBL1XR1      | PRKACB       | FLJ13197     | ZNF608       | AQP12A        |
| LY6H         | C14orf182    | BCL2         | VPS28        | MIDN         | KLF13         |
| H1FX         | CD55         | GLTSCR1      | NEK2         | PLEKHH3      | UNC5B         |
| SKIL         | EYA2         | PDCD6IP      | ESRRG        | TOX          | PHYHIP        |
| GP9          | SCN3A        | PYGB         | CA5A         | LOC400238    | IGLL1         |
| SLC37A1      | HOBX13       |              | 9-Sep ANO9   | RASGRP1      | GRP3          |
| GRB7         | RASD1        | PREP         | DLGAP4       | CDH4         | CDC42EP4      |
| SKAP1        | FAM155A      | NCRNA00189   | LOC100130298 | TXN2         | STOML1        |
| CEBPD        | EPCAM        | NCRNA00152   | PSIMCT-1     | NXP3         | METTL2B       |
| MLLT6        | TOB1         | ANK2         | LOC100133985 | LOC145837    | C2orf57       |
| ENPP7        | SGMS1        | PIGZ         | ZFP36        | MAML3        | APCDD1        |
| HNRNPA2B1    | LY86-AS1     | KLHL38       | SYCE2        | TSSC1        | KIAA0802      |
| LOC100507217 | GPC6         | CDC25B       | MIR99B       | PLCG2        | PCDHGC5       |
| HAAO         | TMEM80       | VPS28        | TNKS1BP1     | GNB1L        | C2orf117      |
| MEG3         | NCRNA00295   | ZFHX3        | NCRNA00051   | EFNA5        | GRASP         |
| SH3BP2       | NCRNA00152   | BCAM         | NCOR2        | KIAA0125     | LHX2          |
| PLEKHH3      | FABP12       | TMEM63A      | MIR200C      | RUFY1        | TACR2         |
| LOC100129637 | HES1         | C6orf35      | SEC14L1      | C13orf26     | KCNN3         |
| LOC283050    | NXK2-2       | SYDE2        | MIR4291      | KCTD1        | HILS1         |
| NRCAM        | C2orf55      | PTPRF        | MIR1301      | AGXT2L2      | FOS           |
| CEP72        | NAV2         | ZBTB7C       | CFL1         | C17orf69     | TBC1D22A      |
| LOC440926    | LIMS1        | NCRNA00295   | BAT2L1       | CEP250       | TBCD          |
| SLC13A2      | RGS17        | C21orf125    | LOC100129716 | FLJ43860     | MYL7          |
| CABLES1      | INSIG1       | KCNQ1        | LOC442421    | CSF3R        | C20orf106     |
| SP9          | LOC100129716 | TSGA14       | HNRNPUL1     | LYL1         | MYO18B        |
| EPCAM        | SRSF5        | VAV2         | MLN          | LOC100130000 | SFN           |
| ST6GALNAC4   | MIR378C      | C10orf40     | TUBA1C       | DEGS1        | PGF           |
| C20orf203    | YPEL2        | TXNIP        | PIGZ         | R3HCC1       | MSI2          |
| FLJ44054     | GRHL2        | SCIN         | CTRL         | TRIM29       | IP6K3         |
| NFIC         | PROX1        | MIR375       | KCTD16       | LMO1         | B3GAT1        |
| UBC          | TCF12        | SNTG2        | C17orf54     | FAM178B      | RSPH1         |
| P4HA3        | RALYL        | DLL4         | FAM101A      | PBX3         | ZNF750        |
| SHANK2       | C1orf55      | EPAS1        | CCDC144NL    | KREMEN1      | TMEM130       |
| LOC284009    | FAM5B        | DPYSL3       | TXNIP        | MGC12916     | MBP           |
| TRAPP9       | SIPA1L2      | ZNF710       | LOC100130581 | ZNF536       | DKFZp566F0947 |
| PRDM11       | ANP32A       | C9orf69      | LOC100216545 | FAM135B      | PSMA6         |
| SOX4         | SMARCA4      | CA5A         | KLHL38       | STEAP3       | C12orf34      |
| PHC2         | MAML3        | GPC3         | AGK          | CRYBB3       | NKD2          |
| SCRIB        | SIK1         | VANGL1       | C14orf49     | C9orf150     | TMCC2         |
| PRMT8        | SEC16B       | FKBP2        | LDB1         | CRISPLD2     | LOC642852     |
| GPR56        | CAPZB        | RAB3B        | PSMG4        | TESC         | SGSM3         |
| HIST1H3D     | PLXND1       | TLE6         | MIR3165      | CAMKK1       | C10orf108     |
| TNS3         |              | 10-Mar MBIP  | CROCCP3      | CIC          | PCBP3         |

|              |              |              |              |              |              |
|--------------|--------------|--------------|--------------|--------------|--------------|
| CHD3         | JUN          | CELSR2       | MIR645       | SORL1        | REM2         |
| NACAP1       | VPS54        | GPC6         | ENPP6        | GRHL2        | ESRRB        |
| ESRP1        | C8orf75      | ATP1B1       | CHRA1        | LSAMP        | NET1         |
| C11orf92     | RAB4A        | SYCE2        | MYT1L        | KIAA0649     | KRT80        |
| PPAP2C       | PBX3         | LOC648987    | C9orf106     | POU2AF1      | BEGAIN       |
| MGLL         | RPTOR        | DSCR3        | WNT11        | TMEM106A     | LAPTM5       |
| PTPRF        | DDX11        | IRX2         | KCNH6        | HEY2         | C14orf181    |
| LOC388630    | C5orf39      | CCL28        | FAM155A      | CELF4        | FLJ43860     |
| RGS3         | BCL2L1       | FSCN2        | LMNB1        | NKX2-2       | ADCK2        |
| ZBTB20       | CA8          | FANK1        | LRRFIP1      | REEP3        | BCR          |
| KDM4B        | NDRG1        | HOXC6        | MARK1        | C14orf162    | RAP1GAP      |
| C12orf44     | UCP2         | BFSP1        | MKNK2        | AGPAT3       | KIAA0802     |
| NOMO2        | HEXIM2       | FUZ          | FCRL5        | CCDC34       | MEF2A        |
| RAB12        | SMYD2        | ERN1         | CASD1        | LOC441204    | CSR1         |
| KCNJ11       | RASSF6       | PRR20E       | RAI1         | C1QL1        | PRLH         |
| MCF2L        | DDC          | CHD4         | ZNF48        | FLJ42392     | RASD2        |
| NEUROG3      | NCRNA00254   | SPTBN1       | STK32C       | TLE3         | OTOS         |
| SCHIP1       | CA10         | SHISA2       | CDKN1A       | DNAH9        | C9orf106     |
| EDEM3        | B3GNT8       | VEGFA        | TOX3         | SCHIP1       | BCOR         |
| CMTM7        | CBX4         | RDH10        | MIR3180-4    | MIR921       | EGLN1        |
| QSER1        | FOXA2        | PDLIM1       | AGPAT3       | CACNA2D2     | CACNG5       |
| LASS4        | C1QTNF3      | SHB          | VAMP3        | GRIK3        | FAM201A      |
| DNAJB12      | GUCY1B2      | ACTB         | PAM          | C20orf112    | MED15        |
| CBX4         | HHEX         | MIR4290      | FLJ41200     | CD40         | CHD5         |
| LRIG3        | IDA          | TMEM80       | CCDC162      | FSCN1        | FHDC1        |
| CABP7        | KLK3         | LOC283050    | LOC100422737 | BCL11B       | EEDP1        |
| C14orf43     | SYT1         | EYA2         | XPO1         | AHDC1        | SDK1         |
| PKD1P1       | ST18         | PHF8         | BIK          | SPATA12      | TMEM105      |
| ASS1         | SPTBN1       | ST18         | C20orf203    | PITRM1       | NCRNA00051   |
| HIST1H2BO    | LOC100289230 | MIR708       | LOC388906    | WNK2         | C1orf187     |
| FLJ13197     | C7orf41      | TMEM61       | FLJ35776     | LHFPL2       | ADAMTS2      |
| LOC644172    | MIR135A2     | VPS54        | TET1         | MYO1B        | KCNQ2        |
| MAP6D1       | ZNF704       | WASF2        | INHBB        | BFS2         | ZIC5         |
| GPR156       | ADCYAP1      | SPPL2B       | SDC1         | HOOK2        | SH3TC1       |
| POU3F2       | LOC283335    | IDH2         | NEK6         | MSI2         | CDC42EP4     |
| SRM          | UBC          | NCR2         | KIAA0087     | GAP43        | KCNG1        |
| PLEKHA1      | BHLHE40      | MTSS1        | PDE4DIP      | ACOT11       | ATAD2B       |
| LOC100130275 | HSPB1        | NFIA         | KLK3         | CCDC85C      | LRP8         |
| PYY2         | RAI14        | LOC100133545 | ITPA         | BRSK2        | MYH16        |
| KLIF10       | MUC1         | SMC2         | S100A2       | NFASC        | CELF4        |
| DUSP6        | LOC283050    | FAM163B      | LRR10B       | PSD3         | LOC100133985 |
| IRX4         | CMBL         | C20orf197    | ETV6         | TSHZ3        | WBSCR17      |
| DUSP4        | DSCAML1      | MIR3925      | SHANK2       | CACNG2       | MNT          |
| ENGASE       | CTDSP1       | TRIM8        | KLHL30       | KIAA0802     | IL6R         |
| DLL1         | INPP4B       | TBC1D24      | RAB40C       | CCDC88C      | C13orf33     |
| PGBD5        | LEFTY1       | DUSP4        | GLIS2        | WBSCR17      | PARD3        |
| SSBP3        | FLJ22536     | C17orf76     | UNQ6975      | BTBD9        | NEUROD2      |
| CHN2         | HIST1H3B     | MCL1         | APP          | BNC2         | ADCY7        |
| GRHL2        | CCDC60       | AZIN1        | MBIP         | UBE2T        | TEF          |
| GDF15        | SDC4         | INSM1        | C9orf150     | CLDN11       | CPLX2        |
| MDK          | C14orf132    | ATP5O        | GET4         | GRIK4        | RAP1GAP      |
| DAGLA        | PDCD6IP      | LOC100288748 | MIR425       | YPEL2        | D4S234E      |
| IFT140       | MAP7         | NCRNA00245   | NFIA         | NFIX         | AKR1B1       |
| KCNK9        | BRD7P3       | ABHD2        | CIC          | LOC728758    | SUZ12P       |
| GLRX3        | LOC100422737 | HSPB1        | SRCIN1       | GJA10        | PKP1         |
| HIC2         | MICALCL      | TOX3         | LOC283070    | ANGPTL2      | BCAN         |
| PRR15L       | HIST1H3D     | UCP2         | C17orf70     | MED9         | CELSR1       |
| TRAF4        | RUNX1T1      | WNK2         | CTDSP2       | LOC100128292 | SARDH        |
| RANBP3       | CRABP1       | NAA40        | MRPL38       | CKB          | NRN1         |
| LDHD         | UAP1         | AGPAT2       | DNMT3A       | C12orf65     | KCNK9        |
| CEL          | AKAP2        | MRPL14       | SMOC2        | GNA12        | BID          |
| MAP1LC3A     | FAM38B       | MGAT4A       | WNT11        | DLX4         | DNJCS        |
| RASEF        | RASEF        | BCL2         | VEZF1        | LHX1         | NFASC        |
| MIR3175      | LIFR         | LOC283143    | CABP7        | SRSF5        | NCRNA00184   |
| GLI2         | GPR84        | CCDC162      | DNPEP        | LOC340357    | RPH3A        |
| HDGF         | CCDC162      | IL8          | GPR176       | LOC730227    | ST3GAL1      |
| PLCH2        | PFKFB2       | ICA1         | GTF3A        | NEUROD1      | NOTCH1       |
| HNRNPF       | MIR4290      | FLJ22536     | TCF12        | PMEP1A       | ACOT11       |
| NEU3         | PTEN         | TSPAN1       | AP2S1        | TYRO3P       | FAT2         |
| MED25        | ACPP         | FZD2         | MIR4323      | MTSS1L       | FLJ45079     |
| AACS         | FNDC3B       | HSD17B14     | FGF9         | CALN1        | LOC100129066 |
| SEMA3F       | C9orf106     | MSL2         | RMST         | NCRNA00051   | FAM19A5      |
| ERBB3        | ST14         | IRX2         | SAMD13       | PDGFRL       | TXN2         |



|                 |                    |                    |                 |                    |              |
|-----------------|--------------------|--------------------|-----------------|--------------------|--------------|
| NAV1            | MCHR1              | TREM1              | ACTN4           | ZDHC22             | MIR4265      |
| ALDH1B1         | MIR1243            | SLC1A5             | NCRNA00152      | ANGPTL1            | MLLT1        |
| SYCE2           | KLF10              | REV3L              | SLC24A3         | MIR3911            | PPP1R13B     |
| MIR3165         | ZBTB20             | YPEL2              | ANXA13          | SPEG               | CHSY1        |
| SH3BP4          | KIF26A             | NTHL1              | CALML3          | C6orf123           | RIN2         |
| CCDC12          | ZBTB7C             | LOC100271722       | MIR23A          | GABRG3             | WNT7A        |
| HK1             | NDUFB9             | CPD                | C11orf41        | MIR3653            | LMO1         |
| STK24           | LOC100133985       | FBXW11             | ST18            | STAG3L4            | NRN1         |
| SHANK2          | ZNF608             | ELAVL4             | CCDC85C         | DKFZP686115217     | TPPP3        |
| LOC723809       | PRKCD              | ESRRG              | LOC100129637    | RPRML              | ABR          |
| PMS2P4          | PCA3               | TMEM135            | CBWD5           | SLIT1              | ADCK3        |
| TMEM209         | MIR4290            | CHD3               | MIAT            | LOC284009          | PRIMA1       |
| CAPN2           | NCRNA00245         | WVVOX              | LPGAT1          | SLMO1              | PLXNA4       |
| FAF1            | HIST1H4E           | RIPK4              | WNK2            | TCP11              | GLI2         |
| NRXN1           | AHRR               | TSC22D2            | GADD45G         | LOC100128023       | KCNK3        |
| TK1             | CTDSPL             | RASEF              | PAX5            | MRAP2              | HAUS7        |
| LMO1            | MAD1L1             | LYPD6B             | SYTL3           | LAMA3              | SCOC         |
| DLG5            | SLC36A4            | TMPO               | EPB41L4B        | C9orf106           | SUN1         |
| LOC100129716    | PAM                | LDHD               | PDIA2           | LRRN2              | RG53         |
| LOC645332       | NUF2               | SETD5              | ARID1A          | MGLL               | IGFBPL1      |
| MIR548T         | ATP11B             | TSPAN9             | SLC7A5P2        | SYPL1              | TFF3         |
| GFRA4           | RHOBTB3            | ZDHC2              | DIP2A           | ZNF536             | REV1         |
| TBC1D16         | MBIP               | ASCL2              | PPP1CB          | HDAC9              | SP3          |
| PBX3            | RANBP3             | KLHL29             | MYT1            | KCN4               | TMEM63C      |
| MRPL14          | C10orf140          | FOS                | EPB41L4B        | ARHGFE2            | TMPRSS4      |
| WDR6            | TBC1D8             | P2RX4              | LRFN4           | CPA2               | IER5         |
| TENC1           | MBNL2              | AK2                | SYT7            | C14orf132          | SOCS3        |
| CAMKK1          | NPHP4              | KCNB2              | LRTM2           | BRD2               | GALNTL4      |
| ZNF703          | PDE4D              | GNA14              | MIR634          | RAPGEF5            | FAM19A5      |
| NTRK1           | SOX1               | SMOC2              | MIR23A          | SPDEF              | SORCS2       |
| ELOVL5          | LOC388692          | CMBL               | LPCAT1          | KLF13              | MIRLET7I     |
| CPM             | LOC100288748       | CHRA1              | FAM84A          | BCL7A              | RARA         |
| ERF             | SNCAIP             | CHAD               | LOC283143       | EYA2               | NCR2         |
| AJAP1           | CASZ1              | SLC38A1            | MIR4296         | DMRTB1             | NPBWR2       |
| C14orf182       | SHISA2             | C14orf181          | PYGB            | SHISA6             | TMEM106A     |
| DDX3X           | ANXA2              | FAM84B             | DNMBP           | CXC5               | RRBP1        |
| PNRC2           | PGPEP1L            | GCOM1              | KCND3           | SEC16B             | ARHGFE10L    |
| KLF12           | LOC400940          | MIR3170            | STEAP3          | CACNA1G            | SRRM3        |
| PTPRJ           | KDM6B              | RASD1              | FOXO3           | WSB1               | ERCC1        |
| STOX2           | LOC100130581       | PHF2               | PTPRN2          | BCOR               | MACROD1      |
| TRIB1           | CALML3             | XCCL17             | XBP1            | BMPER              | NOL11        |
| TFEB            | KCNQ1OT1           | FLT1               | PAM             | NTNG2              | TMEM132E     |
| LOC100310782    | SNHG2              | CAMK1D             | LHPP            | LOC151162          | ARL4C        |
| MYOF            | CASD1              | ATP11B             | STK25           | GAS7               | TRAM2        |
| KIAA2013        | FAM129B            | PRSS8              | ZIC5            | DCTD               | BEGAIN       |
| TPPP            | RAB11FIP1          | NCRNA00168         | SLC12A7         | LTA4H              | BCL11B       |
| RASAL1          | TUBA1A             | GSK3B              | PRSS8           | GPR37L1            | SLC35C2      |
| TRAF3IP2        | TMSB4X             | VAMP3              | TERF1           | SALL4              | ZEB2         |
| TMPRSS6         | ACTB               | FBLN7              | CHD3            | ADCYAP1            | ACSBG1       |
| NAP1L4          | VAC14              | NHS                | INPP5B          | XPNPEP1            | MKNK2        |
| C8orf4          | ARID1B             | ERBB2              | MEPCE           | KIF19              | LBR          |
| SLC38A1         | NMBR               | ERRF1              | SIL1            | PROP1              | BCL11B       |
| TMEM170B        | INO80D             | CDH1               | IGFBP2          | NET1               | MIR4285      |
| LRRC43          | MEF2D              | CPA4               | PTBP1           | PUSL1              | LOC100132707 |
| RTP3            | STIM2              | CSRNP1             | ARHGAP22        | PPP6R3             | TRIP13       |
| <b>LuCaP 94</b> | <b>LuCaP 145_1</b> | <b>LuCaP 145_2</b> | <b>LuCaP 50</b> | <b>LuCaP 173.2</b> | <b>EF-2</b>  |
| MIR10A          | FLJ35777           | HOXB3              | HOXB3           | NFAM2              | UNCX         |
| SFTA4           | HOXB4              | ATP8A3             | PTMA            | CUEDC2             | LOC400932    |
| LOC400932       | ELF4               | FLJ35777           | TRIT2           | CABP8              | PIIF         |
| KCNK10          | LOC100130332       | ELF4               | CASZ2           | LOC400932          | C10orf92     |
| ELF4            | GALNT3             | ID3                | LOC400932       | KLHL30             | ENGASE       |
| C14orf5         | LPCAT2             | TPD53              | FAM125B         | TP74               | SLC12A8      |
| LPCAT2          | NEK3               | NDRG2              | CALML4          | KIAA0183           | C14orf4      |
| KIAA0183        | KCNK10             | FAM125B            | NFIB            | EDN3               | C14orf4      |
| NFIB            | CEACAM7            | CAPZB              | PWWP2B          | LOC441667          | C9orf51      |
| RPTOR           | LOC730228          | CUEDC2             | HOXD10          | FOXA2              | AHDC2        |
| TEAD2           | DLGAP2             | GPC7               | SFTA4           | TNRC18             | TNRC18       |
| FLRT2           | MGST3              | CBFA2T3            | PITPNM3         | MGST3              | CASZ2        |
| CXCR8           | CUEDC2             | DLGAP2             | LMO4            | LOC400549          | LYL2         |
| GAS7            | TPD53              | GALNT3             | CBFA2T3         | ELFN3              | FAM167A      |
| CDKAL2          | IRF2BP3            | SNORA14B           | CDH6            | KIAA0183           | CAMTA2       |
| FAM174B         | WISP2              | POU2AF2            | DMAP2           | LOC100130299       | CHMP7        |
| MBIP            | MICALCL            | HES2               | SLC36A5         | GINS3              | PITPNM3      |

|              |              |              |              |              |              |
|--------------|--------------|--------------|--------------|--------------|--------------|
| VAV3         | IRS3         | LPIN2        | CUEDC2       | UBE2MP2      | SREBF2       |
| CASZ2        | GPC7         | MGLL         | CBX5         | LRRFIP2      | SUN2         |
| LMO4         | EHF          | FLJ35777     | C1orf128     | BEGAIN       | NCRNA00164   |
| CCDC34       | ZNF609       | NCRNA00185   | CAMK1D       | ABR          | KRT42P       |
| FOXA2        | MALAT2       | COTL2        | FAM53B       | LHX4         | CABP8        |
| KIAA0248     | ZMYND9       | RREB2        | LFNG         | PIPOX        | C16orf79     |
| PITPNM3      | GRB8         | BCL2L2       | C14orf5      | TOB2         | CTDSP3       |
| FLJ35777     | SNORA14B     | SAFB3        | TMEM8C       | NGFR         | GAA          |
| NCRNA00052   | TMEM182      | TRIT2        | LOC100130332 | FOXG2        | AGPAT4       |
| CUEDC2       |              | LOC199862061 | BMF          | NCOR3        | RPL39        |
| SIPA1L4      | HS3ST2       | LOC299592626 | ELF4         | UNCX         | DAB2IP       |
| MALAT2       | NOL5         | CCDC131      | KIF20        | CYTH5        | C14orf181    |
| CCDC88C      | COTL2        | SLC36A5      | MALAT2       | CWH44        | PCP5         |
| CAPZB        | RHOH         | LOC100131060 | LOC100131496 | FLRT2        | RTDR2        |
| SIK2         | PSMG5        | ETV7         | EHF          | SPDEF        | CRIP3        |
| CXCR8        | NCRNA00185   | NOL5         | SIL2         | ANKRD26P2    | PLCH3        |
| TSNARE2      | RBM48        | ZNF322A      | KIAA0183     | SRCIN2       | ANK2         |
| EDN3         | NOL12        | GPC7         | IRF2BP3      | LOC400549    | CBX5         |
| WNK3         | SAAL2        | PRMT9        | LOC100271833 | C14orf62     | RBFOX4       |
| LOC98811378  | MIR22        | SLC6A7       | ST15         | C14orf128    | LGALS4       |
| LOC198352983 | FAM125B      | MALAT2       | MIR3187      | FAM101A      | LOC100310783 |
| SYT8         | RREB2        | LFNG         | CACNA1A      | MIR148A      | MIR548W      |
| CLDN5        | SIX2         | DSCAML2      | KIAA0183     | MIR1287      | LOC100129535 |
| C10orf92     | NACAP2       | SIX2         | ASCL2        | MCHR2        | ESPNP        |
| LOC100129067 | ANKRD47      | HOXB9        | RPTOR        | GRIK5        | ATOH9        |
| RASA4        | RFTN2        | EHF          | SAFB3        | CCDC85C      | SMCR6        |
| PTMA         | DLGAP2       | GFRA5        | C2orf56      | MIR3184      | SLC5A11      |
| CBFA2T3      | FLJ35777     | CASZ2        | C20orf145    | CRIP3        | ENPP8        |
| KIFC4        | GPC7         | SYT8         | EDN3         | LOC284649    | KLF14        |
| CCDC85C      | TEAD2        | LOC100422738 | DBH          | MIR3199-2    | ACAP4        |
| CDKN1B       | DSP          | RAI15        | UTRN         | MIR635       | UNCX         |
| LIFR         | ATP8A3       | C14orf5      | DSP          | MCART2       | MIR4298      |
| NCS2         | MGLL         | SAAL2        | CEACAM7      | CLSTN2       | CCR8         |
| DLGAP2       | LPIN2        | LOC100130276 | NEURL        | LOC100499468 | DNABJ13      |
| ASCL2        |              | 10-Sep ABR   | FAM102A      | MIR4298      | LOC100129035 |
| MSI3         | C14orf5      | MICALCL      | NFIC         | KDM4B        | EBF4         |
| LOC400549    | CCDC131      | INSR         | PTP4A4       | WDR26        | SRRM4        |
| WASF3        | RPTOR        | TNRC19       | MYH10        | LOC100130299 | OTOF         |
| CRIP3        | CAPN3        | CEACAM7      | REPIN2       | C16orf79     | MALAT2       |
| CMBL         | SEMA4B       | SLC37A2      | SREBF2       | FAM83F       | ABLIM3       |
| TGIF2        | LFNG         | ARFGAP3      | CLDN4        | UNCX         | MSI3         |
| ASB9P2       | GPC7         | KRT8         | GEMIN8       | NCRNA00208   | MLN          |
| RREB2        | IRS3         | HNRNPL       | LOC100289411 | RTDR2        | GRM5         |
| GTF21        | ASB9P2       | C3orf22      | KRT9         | SYT14        | SRP10        |
| FAM178B      | C9orf107     | VPS37C       | SETD1B       | LRRTM3       | MIR3689B     |
| LOC730669    | IP6K4        | DDC          | MIR376       | TPTE         | PCMTD3       |
| LHX4         | CCRN4L       | LOC730228    | C9orf107     | NCRNA00185   | RXRA         |
| SEMA4B       | TNRC19       | TGIF2        | FLRT2        | ADAMTS3      | LY6D         |
| TGIF1        | TGIF1        | MIR613       | SEC11C       | DPF2         | CEP165       |
| SLC12A8      | SATB2        | FOXJ4        | TNRC19       | KIAA0650     | C19orf30     |
| SCNN1B       | IRX3         | LGALS9       | LASS5        | WASF4        | EML2         |
| IP6K4        | SFTA4        | C18orf2      | LRRTM3       | CPLX3        | ZNF537       |
| FAM129B      | CHN3         | ADCYAP2      | LOC100130332 | UNC5B        | PVRL2        |
| ZNF751       | SIPA1L3      | C8orf76      | TNS2         | MICALL3      | FAM83F       |
| CLMN         | FAM84B       | NEK3         | SOX3         | SUN2         | LOC730228    |
| CALML6       | ST3GAL2      | NFIC         | ZBTB7B       | FGFR4        | PLEKHA7      |
| LOC100131497 | TMEM63A      | KIAA0312     | HOXA10       | PITPNM3      | IRF2BP3      |
| ZIC3         | PGBD6        | KIAA0377     | MIR378C      | MIR4312      | BAG6         |
| MBIP         | MIR1288      | ZBTB7C       | DSCAML2      | TIAF2        | C16orf79     |
| NACC3        | NEAT2        | RFTN2        | FAM69B       | ANKRD3OBL    | NFAM2        |
| DDX12        | HFE3         | NUAK3        | SH3BP5       | CHST9        | ZC3H4        |
| MYT2         | LOC100499468 | SFTA4        | LAMA6        | GHRHR        | ATP11A       |
| KCNIP4       | NKAIN3       | C1QTNF4      | CA11         | HAAO         | C21orf3      |
| C2orf56      | PBX4         | RAB40C       | DDX12        | EGFR         | LOC730669    |
| CDKN2C       | LOC400931    | LOC100271832 | MEF2D        | C20orf118    | DISC2        |
| IER6         | MIR30D       | ATP2A4       | IP6K4        |              | 10-Sep SEPN2 |
| KRT9         | SLC6A6       | LOC100133613 | CLDN5        | KCNN4        | UNC5B        |
| SOX5         | DLGAP2       | SOX5         | ACTG2        | CCDC34       | RNF188       |
| LFNG         | KRT9         | NAV3         | PIM4         | LOC399745    | C14orf181    |
| BCOR         | RINL         | EPB41L4B     | HSD11B3      | PPIF         | CROCC        |
| MIR327       | OR51E3       | FBXW4P2      | THRA         | SMCR6        | FLJ43861     |
| RALYL        | C12orf43     | SH3BP5       | KRT8         | MRPS24       | KCNA11       |
| MYH10        | TEAD2        | RANBP4       | FAM129B      | GPR13        | MTSS2        |

|              |              |              |              |              |           |
|--------------|--------------|--------------|--------------|--------------|-----------|
| CALML4       | PHF20        | FAM129B      | SATB3        | TACC3        | PTMA      |
| RALYL        | IRF3         | LOC390859    | SMPD4        | ELFN2        | C2orf136  |
| LOC648988    | SPATA14      | SMARCA3      | NCRNA00052   | FAM83G       | HGFAC     |
| NFIX         | YWHAZ        | RPTOR        | NTHL2        | MYO18B       | VAV3      |
| NEAT2        | ABR          | C2orf58      | NUAK3        | PQLC3        | CUEDC2    |
| AZIN2        | RNF126P2     | SEC11C       | TLE3         | MIR153       | C14orf133 |
| NUDT15       | EPB41L4B     | PITPNM3      | LOC100128240 | SEZ7         | KIAA0126  |
| RBM20        | LOC648988    | SERGEF       | FBXW4P2      | FAM49B       | RFX3      |
| MICALCL      | NAV3         | C9orf107     | DAGLA        | TMEM132E     | SIK2      |
| ZNF320       | STK25        | IGFBP3       | TMEM182      | MIR1302      | MRPL38    |
| HSD11B3      | SHISA3       | ING2         | ANK3         | CDC42EP3     | C21orf34  |
| KIF26A       | GP10         | ST15         | SIK2         | LOC645753    | SOX5      |
| CD10         | LOC145837    | LOC100129066 | TFF4         | ADAMTS3      | TOB2      |
| MBIP         | LBR          | SIPA1L4      | TGIF2        | SMCR6        | CASZ2     |
| FSCN3        | NT5M         | DNMBP        | FOXA3        | C14orf5      | DRGX      |
| TRIO         | INSR         | AMACR        | PCBP2        | IRF2BP3      | PPP2R5    |
| EPB41L4B     | TMEM182      | ID3          | PROX2        | TBC1D22A     | SLC25A30  |
| MIR196B      | ID3          | DSP          | SELPLG       | A2LD2        | CACNA1I   |
| FOXJ2        | OCLN         | TEAD2        | NAT8L        | ANKRD36BP3   | ADAMTS3   |
| PLXNA2       | CALML6       | OR51E3       | NEAT2        | FAM19A6      | KCNT2     |
|              | 10-Sep       | CCDC34       | FGF10        | SLIT2        | GA57      |
| DSP          | PDE4DIP      | RAB11FIP2    | ALDH1B2      | LOC100294363 | ARHGEF20  |
| CDKN1A       | SNX17        | CA11         | SOX5         | ZNF707       | TMEM93    |
| TRIM15       | CDKN2C       | NUP211       | RREB2        | KIAA0088     | SPEG      |
| TNRC19       | SYT8         | HOXD9        | KCNK4        | ACTR3BP3     | SH2D7     |
| COPS9        | LOC100131061 | NFIB         | LOC730228    | OLFM2        | LOC150198 |
| CRB3         | NSMAF        | BMF          | SLC37A2      | C17orf55     | TSPAN10   |
| ATP2C2       | ARHGEF39     | INSM2        | BRD3         | C6orf130     | KCTD8     |
| TP74         | LOC99560699  | MIR1204      | ZC3H5        | TMEM54       | FCN2      |
| SLITRK7      | LOC199406186 | IRS3         | LIFR         | ABTB2        | FAM102A   |
| BRD3         | GINS3        | DNAJC13      | SPTBN6       | PBOV2        | CAMK2A    |
| AGPAT3       | KLF4         | MYH10        | EFHD3        | LOC730669    | B4GALNT4  |
| RASD2        | PBX2         | SH3BP6       | EDN3         | GALNTL5      | FLJ45080  |
| ELFN2        | INSM2        | BCOR         | COTL2        | NEUROD3      | TBC1D17   |
| FAM102A      | MAML4        | FAM102A      | UBTF         | ALG3         | FOXN4     |
| NPTX2        | MIR135B      | ATP2C2       | HES7         | LRP5L        | FMOD      |
| CCDC34       | ATP11B       | MEF2D        | ZIC6         | TPRG2        | IQSEC2    |
| KLF14        | SIPA1L3      | PPAP2C       | HDFG         | IGLL2        | LOC730442 |
| KIF20        | MIR23B       | FAM174B      | SCNN1A       | LHX3         | CROCCP3   |
| TNS2         | CBFA2T3      | ETS3         | ABTB2        | WASF3        | KLHL30    |
| AHRR         | MBNL3        | MNDC3B       | MIR3622      | MIR148A      | C1orf199  |
| IRF2BP3      | SGPL2        | MGST3        | LOC730669    | SCARB2       | PSD3      |
| S100A3       | RASSF6       | TCERG1L      | C6orf36      | RASD2        | TBC1D22A  |
| TMSB4X       | FOXA2        | CAPN3        | NOL5         | LOC574539    | CBX5      |
| SOX3         | NUDT13       | LASS5        | KLHL30       | TMEM116      | ALOX16    |
| ARHGEF17     | KIAA0183     | TM4SF2       | PPAP2C       | LOC282998    | TPPP      |
| LOC284649    | NEED2        | SDC2         | ARHGEF3      | TCP12        | LRTM3     |
| ABR          | ATP2C2       | CCDC41       | LPIN2        | C14orf24     | SYT3      |
| KLF14        | ACP7         | INSM2        | C16orf92     | MIR378C      | MIR658    |
| CEACAM7      | COL4A3       | LOC643407    | MIR3189      | C5orf16      | OTUB2     |
| POU2AF2      | ENPP7        | C1QTNF4      | MYOF         | C7orf42      | COL5A2    |
| COTL2        | GFRAS5       | COMP         | CCDC88C      | BMPER        | LOC400239 |
| FOS          | SERGEF       | CHD7         | FOXP5        | SREBF2       | NOTCH2    |
| ABHD12       | IER6         | CNKSRR4      | RAB11A       | FAM102A      | STRA14    |
| C14orf183    | TNFSF9       | NT5M         | LENG10       | TSPAN19      | LOC283178 |
| ETV7         | PLXNA2       | UTRN         | IL17REL      | EDN3         | PHACTR4   |
| SIL2         | SOX5         | VAV3         | NCRNA00246   | ZC3H4        | RAPGEF2   |
| LENG10       | AFAP2        | C7orf42      | UCP3         | AIPL2        | PLXNA5    |
| BMF          | CLIC2        | FAM190B      | RANBP4       | INSM2        | SIM3      |
| TERF2        | SLC6A21      | LMO4         | LOC99562757  | REV2         | MGAT4A    |
| LOC100272218 | PITPNC2      | ST19         | LOC199408849 | TDRG2        | ATP6VOE3  |
| INSM2        | SAT2         | KRT9         | NCRNA00185   | PCSK10       | KCNJ19    |
| C14orf133    | KIAA1530     | KIAA0087     | TEAD2        | KRT16        | MAD1L2    |
| ST19         | ID2          | BCOR         | FOXJ4        | KCNK17       | C22orf35  |
| PSMB2        | DNMBP        | MBIP         | NEK3         | UNC5A        | MIR630    |
| FAM53B       | ASCL2        | KCTD2        | C20orf113    | LOC100132355 | BCL11B    |
| TBCC         | ATP13A4      | MIR22        | LOC100130895 | CEBPG        | TP74      |
| ISLR3        | FOXJ4        | SIPA1L4      | DLL5         | ANGPT2       | RHOF      |
| SMAD8        | RAB11FIP4    | PGBD6        | GPR37L2      | C9orf51      | AFAP2     |
| DUSP17       | TRIB2        | RET          | LOC100128789 | SLC35C3      | YWHAZ     |
| C1QTNF4      | SHISA3       | GRB8         | GP10         | MIR590       | LOC400239 |
| HSD17B7      | SUMO1P2      | CCDC163      | HS6ST2       | CPLX3        | MKI68     |
| HES2         | MIR376       | NCRNA00185   | PRR15L       | MIR135B      | NEUROD2   |

|              |              |              |              |              |              |
|--------------|--------------|--------------|--------------|--------------|--------------|
| BCOR         | NR4A3        | FAM178B      | ACTB         | ITPRIP       | TRIOBP       |
| NEK7         | DCAF4L3      | CLDN4        | SOX14        | NCRNA00052   | CCDC34       |
| LOC400239    | WEE2         | AFAP2        | ZMIZ2        | NFIB         | MAP2K4       |
| GRHPR        | S100A12      | CDKN2C       | BCOR         | ADAM7        | LSP2         |
| GADD45G      | GRHL3        | PGM2L2       | RUNX2        | NAA12        | KREMEN2      |
| KIF26A       | ZFAT         | C2orf56      | CAPRN2       | C5orf16      | EIF2C3       |
| IMPA3        | RALYL        | ARHGFE39     | ZFHX4        | C18orf2      | ANK2         |
| LOC284751    | LOC390858    | EDN3         | NR4A3        | MED28        | LOC440927    |
| MARK3        | ABHD12       | PCBP2        | MIR1228      | LOC642237    | MICALL3      |
| C14orf182    | MYT2         | PBOV2        | MAML4        | OLIG4        | AZIN2        |
| NTHL2        | SPPL2B       | SEMA4B       | CRIP3        | CCR8         | SHANK3       |
| KRT8         | C2orf58      | CDON         | DUSP23       | LOC400549    | PTP4A4       |
| COMP         | IL25         | SRP10        | HNRNPF       | ADARB3       | C9orf70      |
| ZMIZ2        | B4GALT6      | MIR23B       | HNRNPU       | CHN3         | COL9A3       |
| SRSF4        | HOXD9        | ST6GAL2      | SCOC         | TBC1D17      | CACNA2D3     |
| TPD53        | C20orf145    | SLC4A12      | SPPL2B       | MYH10        | C14orf71     |
| TSC22D3      | FLT2         | NCRNA00112   | SBNO3        | NCOR3        | CIC          |
| C1QTNF4      | GRHL3        | SATB2        | CDH2         | NRXN2        | NHLH2        |
| ADCYAP2      | LOC100133613 | RASA4        | DLEU3        | C8orf47      | INSM2        |
| YKT7         | CACNA1C      | TCF13        | LOC100129067 | TRPM9        | CRHR3        |
| LOC100133546 | INSM2        | ASCL2        | KIAA0241     | SH3TC2       | FLJ43861     |
| FLJ35777     | NUAK3        | ASB9P2       | MED26        | C18orf2      | MIR1276      |
| C14orf181    | ZBTB7B       | LOC100133612 | CTBP3        | FAM174B      | ELF4         |
| MIR23B       | LOC100133545 | LOC283050    | PLXNA3       | EBF4         | ELFN3        |
| UTS2R        | SCOC         | LOC100130331 | FLT2         | KLHL30       | ZMIZ2        |
| KCNK6        | PGS2         | HS3ST2       | CXXC6        | ADSSL2       | ARL17        |
| C2orf86      | MSI3         | PLXND2       | SH3TC2       | ROCK2        | CTTN         |
| NCRNA00052   | CDH6         | SIK2         | LOC283664    | TARBP2       | PSMB2        |
| CHSY2        | COL21A2      | FOXA2        | MIR938       | GPR133       | C14orf163    |
| GLRX4        | GPC7         | AACS         | BCL2L2       | IGSF22       | DMRTB2       |
| GPRC5C       | BCOR         | TNFSF9       | HOOK3        | ASB9P2       | TIMP3        |
| CTBP3        | TMEM30B      | KIAA0183     | SMARCA3      | HIC2         | TMEM122      |
| COP59        | KIAA0241     | TOB2         | ACSM2B       | LOC100129067 | NAV2         |
| DACH2        | SLC37A2      | LOC338800    | MGST3        | CNTN3        | LOC100132708 |
| SETD1B       | BMF          | LRIG2        | LOC100130299 | FBLN2        | TPPP         |
| HS6ST2       | SCNN1B       | FOXP5        | SNCAIP       | BEGAIN       | B3GNT8       |
| MACF2        | PPAP2C       | C11orf93     | MIR327       | ROR3         | LHX4         |
| SOX5         | LASS5        | RALYL        | FOXA2        | ANKRD47      | ZFAT-AS2     |
| LOC221123    | ADCY10       | LOC283664    | SPEN         | FAM125B      | MYT2         |
| BAIAP3       | SEC16B       | PDGFRL       | PDE4DIP      | MYO18B       | CELF5        |
| EFHD3        | ZC3H5        | C1orf128     | ID3          | TRIM30       | KDM6B        |
| MAL          | RAB21        | PSMG5        | C12orf45     | SEZ6L        | GEMIN8       |
| RET          | HIST2H2BE    | NFIA         | MFS11        | TSPAN10      | SDK2         |
| ADAM7        | TLE3         | FBXO33       | GPR85        | CDH18        | GTF2I        |
| NCRNA00185   | IER3         | RALYL        | SIK2         | CAMK2B       | C13orf36     |
| PSD5         | LOC100129067 | MGLL         | MDC2         | PLXNA2       | BCOR         |
| ID5          | GPC6         | ID5          | C21orf30     | C14orf71     | CORO2A       |
| ProSAPIP2    | HOXB9        | RASSF6       | TUBA1A       | IMP6         | LOC282998    |
| PRKCD        | ATP7B        | LOC145838    | SNORA14B     | SYNPO        | INF3         |
| C1orf128     | MIR760       | TARBP2       | GTF2I        | VSTM2L       | FSCN2        |
| MDC2         | RIMS3        | MIR135B      | BCOR         | NEUROD3      | CRYBB4       |
| YWHAZ        | ANKRD11      | RARA         | C10orf109    | MIR4312      | BAT2L2       |
| CBFA2T3      | PRAC         | EFHD3        | ID3          | GSDMC        | FAM131C      |
| INSL6        | FLJ13198     | C12orf43     | KLF7         | TMPPSS16     | C14orf181    |
| C16orf82     | RAPGEF6      | MIR196B      | C1orf153     | NCRNA00052   | TMEM54       |
| BCL2L2       | ADCY6        | ARL4C        | HK2          | VAPA         | PPP2R2C      |
| PRDM7        | SIL2         | HOXB2        | CEP165       | CWH44        | SLC19A2      |
| C14orf181    | PTP4A4       | TMSB4X       | INSM2        | CA9          | TBC1D22A     |
| BCR          | TFCP2L2      | DMAP2        | LOC100131061 | MDM2         | ADCK2        |
| GRAMD5       | BCOR         | UNQ6976      | C19orf62     | MIR4252      | KIAA0183     |
| GPR85        | BAALC        | TBL1XR2      | AHDC2        | MPRIP        | TESC         |
| AMOTL3       | C12orf43     | MYOF         | MIR4311      | LOC148190    | CHST4        |
| NT5M         | DUSP7        | SYDE3        | TEAD2        | KLF14        | PLXNA5       |
| C12orf45     | GABRG4       | TEAD2        | LIMS2        | GPR13        | RTN4RL2      |
| KCNK17       | PRKAB2       | CLDN5        | CPA2         | MRM2         | KCNQ4        |
| ARAP2        | CHRNA10      | PPP1R3B      | RET          | LOC100130299 | PGBD6        |
| LPIN2        | NOS2         | LOC100130332 | IGFBP6       | VWC3         | EDN3         |
| ZFHX4        | LGALS9       | STAP4        | CDC25B       | SCGN         | NEAT2        |
| ZBTB7C       | LOC440927    | RHOH         | GRP          | ECE2         | MIR602       |
| 10-Sep       | SIPA1L3      | LOC100133546 | SIPA1L4      | RNF19A       | CXCR8        |
| ISYNA2       | ATP1B2       | TBC1D9       | HNRNPL       | KCNMA2       | NFE2L2       |
| SPEN         | HOXB2        | ZBTB7B       | NOS4         | PRKD2        | E2F3         |
| BAI2         | CSRNPA4      | SAT2         | ZP2          | CDKAL2       | MIR590       |

|              |            |              |              |              |              |
|--------------|------------|--------------|--------------|--------------|--------------|
| TERT         | LOC399882  | CDKN2A       | CCDC41       | SEC16B       | ARHGEF17     |
| LOC283051    | TMEM150C   | LPCAT2       | SGMS2        | LRRN3        | OLFM2        |
| STEAP4       | CRIP3      | KCNK10       | GALNT3       | QSOX3        | C4orf24      |
| C1orf90      | SLC26A10   | RASSF7       | MPG          | LOC100130276 | GPR154       |
| IDH3         | ZBTB7C     | CLDN11       | MAML4        | ARL4C        | ADCYAP1R2    |
| ZNF218       | TRAPPC10   | LOC100499468 | LRIG2        | RAP1GAP      | SYPL2        |
| NAV3         | CRTC2      | TH           | TARDBP       | CHST16       | LMAN1L       |
| MIR3665      | PCDH2      | FOXJ2        | UBOX6        | DAND6        | KLF10        |
| EZR          | CLDN5      | MYRIP        | MAZ          | HK2          | MIR153       |
| LYPD2        | EEA2       | SNORA70E     | NGG5         | MIR594       | C4orf45      |
| TBC1D25      | NCRNA00052 | DLGAP5       | EFR3B        | KLK4         | TTYH4        |
| MLN          | PTMA       | RAPGEF6      | OPA2         | INSM2        | MAFF         |
|              | 10-Sep     | FOXP3        | TSPAN15      | MIR3606      | HOXA8        |
| RARA         | ID3        | HOXD12       | ARAP2        | MRPS28       | OLIG2        |
| PEX5L        | FAM84B     |              | EFCAB3       | NRXN2        | C1QA         |
| TREM2        | INTS8      | KIAA0431     | POU3F3       | MIR771       | KIAA0126     |
| C6orf130     | FAM135B    | SOX14        | ANXA3        | ITPKB        | NAPA         |
| IER3         | INPP4B     | RFX4         | RBM39        | NFIB         | PRELP        |
| SEPN2        | REPIN2     | KCNQ1DN      | GPR57        | ARHGEF4      | WNK3         |
| CDON         | MACF2      | NR4A3        | C20orf204    | MIPOL2       | VGLL5        |
| PRR20E       | CHRAC2     | LOC283336    | INPPL2       | CACNA1A      | MSI3         |
| KIF26A       | FLJ45080   | PRAC         | SLC6A6       | WBSCR18      | FAM53B       |
| TPSD2        | POU2AF2    | YWHAZ        | ATP2A4       | FLJ13225     | 10-Sep       |
| LOC100216546 | SH3GLB2    | CNKSR4       | C10orf141    | BAG6         | CLSTN2       |
| SIX2         | CCR9       | MIR193B      | UNC13D       | VASH2        | ADAMTS3      |
| ZC3H5        | HIST1H2BD  | MCHR2        | ETV7         | ST19         | C14orf94     |
| UBTF         | TRAK2      | KCNK6        | HOXC7        | ADAMTS3      | DAND6        |
| FOXP5        | PLXNA3     | PHC3         | KIFC4        | KIAA1615     | RBFOX4       |
| MIER2        | MIR23B     | TERF2        | CAPN10       | FSCN2        | MIR2279      |
| ZC3H4        | IMPA2      | RTN4RL3      | RNF188       | ADCYAP2      | CDH23        |
| RGS13        | SLC30A9    | ADCY6        | TPD53        | CROCC        | GRIN2C       |
| B3GNT9       | TRIM15     | CPLX3        | CBX4         | LOC284750    | ADAM13       |
| PCBP2        | FAM174B    | ANKRD47      | SEMA4C       | PLXNA3       | BGN          |
| PIGZ         | GEMIN8     | SDC5         | LOC100499468 | HTRA2        | HOOK3        |
| NUDT16L2     | CAPN10     | MBNL3        | LYL2         | SETD1B       | USP3         |
| MIR1179      | GPRC5C     | ZNF707       | NUAK2        | NAV2         | NGFR         |
| PTPRJ        | TRAF3IP3   | CCRN4L       | ADCY6        | WBSCR18      | COL22A2      |
| ECE2         | MYH10      | LOC100132355 | KDM4B        | MAT2B        | MIR4270      |
| FAM125B      | ANK3       | TERF2        | MIR22        | C7orf72      | KLHL30       |
| FLJ45080     | TRIT2      | ATP8A3       | WDR35        | BEGAIN       | DUSP8        |
| C14orf181    | SOX3       | TRAK2        | REV3L        | KCNK10       | BEGAIN       |
| FLJ22537     | C1D        | XBP2         | DLL2         | MIR2118      | RXRA         |
| DEGS3        | UTRN       | TLR6         | SLC25A43     | CCDC34       | LOC730442    |
| PLEKHG4B     | LOC338800  | HOOK3        | IER3         | RFX3         | EMP4         |
| LY86-AS2     | PCBP2      | TRAF3IP3     | LOC390858    | LOC643955    | NCS2         |
| SPPL2B       | ERI4       | MCART2       | TAGLN3       | PVRL2        | GRAMD5       |
| SLC7A5P3     | ERN2       | PHLDB2       | CCL29        | CHRN5        | DAGLA        |
| ASB3         | SLC30A9    | KLF14        | LOC644173    | DNAH10       | RNU6ATAC     |
| KCTD2        | ZNF218     | PLXNA2       | TRIM9        | LBR          | NPTX2        |
| KLHL31       | PROX2      | GEMIN8       | HSPB2        | GPR13        | EFNA4        |
| ZNF776       | LNX2       | LOC284649    | GREB2        | HPCAL2       | LOC100129067 |
| MIR579       | TOB2       | RBM48        | DNAJB13      | CDHR4        | DLX5         |
| CBX9         | RPTOR      | MIER2        | FBXO33       | CHD10        | LRRC48       |
| ESPNP        | RNF19A     | CCDC88C      | TRAF3IP3     | CCDC88C      | MSI3         |
| PGS2         | SNX17      | LOC100499468 | SRM          | DMBT2        | ARFGAP4      |
| LGALS3BP     | SH3BP6     | RALGAPA3     | SMYD4        | ALOX5AP      | MRPS13       |
| PYGB         | AJAP2      | PLA2G7       | C12orf43     | TLE7         | MYBPH        |
| LRIG2        | PITPNM3    | IFNGR3       | TUBB2B       | FAM201A      | MICALL3      |
| SH3BGRL4     | GTF2I      | SCNN1A       | CTDSP3       | DNAJB13      | LOC100130895 |
| TFCP2L2      | CCDC88C    | TMEM182      | ENTPD3       | CPA6         | TIFAB        |
| LOC401110    | ASXL4      | LOC100126785 | JUL          | MIR200B      | ZFP36L3      |
| TMEM30B      | HIST1H2BC  | ADCY10       | ABR          | SARDH        | MIR602       |
| SUMO1P2      | EIF2C3     | PPP1CB       | FKBP3        | GTF3C5       | INTS2        |
| SNORA14B     | FAM178B    | RAB21        | ACP7         | KCNMA2       | C20orf21     |
| SLC45A5      | MEF2D      | COL4A2       | FAM174B      | LOC648988    | B3GALT6      |
| CKB          | SLC6A6     | EGFR         | AZIN2        | SCARB3       | ARHGAP13     |
| SLC25A48     | BRD3       |              | 10-Sep       | RNF19A       | BCOR         |
| C20orf145    | GOLGA7B    | LOC200262    | ZFAT         | BAGE5        | GHAT         |
| RHBDF2       | FAM49B     | RCAN2        | HOXB9        | PTP4A4       | KIF20        |
| MIR596       | RFX2       | RFX2         | KLF14        | SH2D7        | LOC338800    |
| BAT2L2       | AMACR      | BHLHE41      | ZBTB21       | KCNJ12       | GPRC5C       |
| WEE2         | DEPDC7     | BRD3         | TRIM48       | HGS          | NEK7         |
| C10orf141    | LRP12      | ID2          | APOLD2       | PRSS56       | C15orf51     |

|           |              |              |
|-----------|--------------|--------------|
| OXR1      | TGM3         | S1PR3        |
| BCL2      | PCDH1        | SH3BP4       |
| MLPH      | CROCC        | RG512        |
| FAM13A    | C12orf66     | CXCR7        |
| CTTNBP2   | ATP11A       | TRPM2        |
| GPC5      | PRPH         | PACSIN2      |
| TOX3      | SLC45A4      | TOX2         |
| HAO1      | ACP6         | INSM1        |
| MIR3167   | PSD          | UBTD2        |
| CALML3    | TSC22D2      | MIR148A      |
| ITPA      | MSI2         | C6orf129     |
| MRPS23    | PGS1         | FOXP4        |
| PGM2L1    | MRPL48       | INSRR        |
| PRMT8     | UBTF         | SIPA1L2      |
| NOTCH2NL  | GPC6         | ECEL1        |
| KCNK16    | KLHL14       | ANKRD33B     |
| PLEKHH3   | OCLN         | H LCS        |
| RAB40C    | THUMPD3      | LOC100233209 |
| COPS8     | PRMT8        | LOC283143    |
| PRMT8     | AQP9         | COL22A1      |
| PRSS8     | KCNK3        | PRDM11       |
| FAM59A    | MLLT6        | MYLK         |
| WHSC1     | PACS1        | SH3BP4       |
| MIR548Q   | KCNN4        | PUM2         |
| MSI2      | NAV2         | GTF2I        |
| LRP2      | HOOK1        | RPH3AL       |
| NCEH1     | MICALCL      | SFMBT1       |
| FAM46C    | ANK3         | RHOU         |
| KCNJ2     | IER5         | PLEK2        |
| HIST1H2BO | SV2B         | MIR147       |
| SMYD3     | RHOB         | PSIMCT-1     |
| CA10      | LOC100129046 | TMEM201      |
| DNAJC12   | LZTS2        | CAPN12       |
| PMCHL2    | MFSD3        | NCRNA00051   |
| ETS2      | RSPH1        | VWA5B2       |
| UBL4B     | HOXB13       | TGFB3        |
| ATP8A2    | GCNT1        | NTN3         |
| C20orf196 | ATP1A1       | NCRNA00290   |
| NKAIN2    | LMO4         | VAMP3        |
| N4BP2     | MIR148A      | RBFOX1       |
| IGLL1     | ZBTB10       | LOC100268168 |
| UGCG      | CANT1        | FOXD2        |
| MIR620    | MTMR7        | CORO2B       |
| LZTS2     | IER5L        | NCKAP5L      |
|           | MORN3        | SIPA1L2      |
|           | IQSEC1       | PRKG2        |
|           | MIR1471      | PPP1R15A     |
|           | MECOM        | PLA2G6       |
|           | SPINT2       | MIR1204      |
|           | LOC100499467 | KDM2B        |
|           | RBM38        | PMEPA1       |
|           | FABP7        | TLE3         |
|           | SERPINH1     | KLHDC8A      |
|           | GET4         | ASAP1        |
|           | MIR620       | PBX1         |
|           | MACC1        | MAD1L1       |
|           | BAHCC1       | FAM20C       |
|           | ATF3         | KIAA0895     |
|           | PLS3         | CDK14        |
|           | TNK2         | AP2S1        |
|           | TFF3         | RBFOX3       |
|           | SOX4         | MYO18B       |
|           | WHSC1        | DAB2IP       |
|           | DGKI         | RG53         |
|           | GLRX3        | MRPS23       |
|           | LIPC         | ZBTB7B       |
|           | MAN1A2       | MAT2A        |
|           | TMEM181      | MCC          |
|           | PDE4D        | MAPK8        |
|           | SLC7A5P2     | GINS1        |
|           | ABHD12       | ACOT7        |
|           | KCNJ11       | HSPB1        |
|           | FAM100B      | GPR26        |

TUBB2A  
EFR3B  
CD164  
MIR1280  
LAG3  
SUN1  
TRANK1  
KIF26A  
CA10  
GIF  
CISH  
PAX5  
FAM83F  
MEX3B  
TMEM174

10-Mar

MIR3170  
HOXD13  
PUM2  
CHD7  
GAPDH  
TSHZ2  
LOC644172  
C20orf3  
ZKSCAN1  
LOC729678  
C9orf129

NCRNA00207  
LOC254559  
KCNH2  
MIR3922  
LCN12  
ZNF438  
PCGF3  
MIR193A  
ARHGFEF17  
FAM129B  
PTPRJ  
SCARB1  
ADORA1  
EMX2  
NAT10  
FANCE  
SPP2  
COMT  
MTRNR2L6  
FHL2  
MIR641  
TSPAN15  
LMO1  
RUNX3  
CLPTM1L  
KCNJ12  
MLN  
RAPGEF1  
NOS1AP  
LOC100128003  
S1PR3  
PQLC1  
C17orf107  
LOC441204  
LOC100499467  
FBXW11  
C1orf198  
C21orf56  
TNNI2  
USP24  
SLC39A11  
UBE2V1  
RAI1  
PSMG3  
MIR648  
WDR34  
CSF3R  
MIR193A  
TUB  
TNRC6C  
SCARB2  
SEMA3B  
AHDC1  
UBAC1  
ZNF238  
TMEM115  
SNRK  
KCNQ1OT1  
PGS1  
CACNB3  
TIMP2  
ZNF542  
PSAP  
EEF1A2  
LRIG1  
FSCN1  
FOS  
CACNA1A  
KRBA1  
EFHC2  
OPCML  
FAM118A  
TMEM168

RASA3  
XRCC3  
LHX1  
VAPA  
NCRNA00176  
AGPAT2  
FABP6  
DLX3  
ARC  
ADAM11  
TNFRSF8  
NFIA  
FAM105B  
L1CAM  
SERINC2  
LOC200772  
MYT1L  
CPEB2  
MAD1L1  
NCRNA00051  
VWA2  
MIR4262  
LRRC37A  
SIL1  
DDX19A  
KLF7  
LOC100129345  
KCNMA1  
AFAP1-AS1  
TRIM33  
TACC2  
CNTN2  
ITGA9  
MIR147  
MAPKAPK2  
REEP1  
CAP2  
LOC100288778  
FLJ45079  
MYO15A  
COL22A1  
ELL  
HPCAL1  
ACOT11  
NUAK2  
IGSF5  
CRIP2  
SYN3  
HMGN2  
SSH1  
TRIM56  
RPS6KL1  
CCDC12  
AVPR2  
SCN5A  
NXP3  
RABGEF1  
C1QTNF1  
SAP25  
ELN  
ARHGAP23  
TMEM200C  
KLF13  
ECE1  
CMIP  
PTPRH  
GBX1  
UBE2MP1  
PVRL1  
C1orf65  
TSNARE1  
C8orf71  
ASAP1



DNMT3A  
BCOR  
TCP11  
PRDM11  
TWIST1  
NR4A2  
MIR601  
ANO1  
TFAMP1  
HAAO  
LMX1B  
RAB11FIP4  
RHPN1  
KCNN3  
SPRED2  
TSEN15  
FOKK1  
C20orf112  
MYCBP2  
NT5DC3  
PDGFA  
SLC47A2  
SNORA77  
VWA3B  
TMEM90B  
ZMYND11  
NKAIN1  
KLF7
