# Supplementary material for: Subtype heterogeneity and epigenetic convergence in neuroendocrine prostate cancer
Source: PubMed Central journal article supplement (PMC8486778; doi:10.1038/s41467-021-26042-z), 2021-10-01
Supplement: 41467_2021_26042_MOESM5_ESM.pdf [file 41467_2021_26042_MOESM5_ESM.pdf]

## Reporting Summary

Nature Research wishes to improve the reproducibility of the work that we publish. This form provides structure for consistency and transparency in reporting. For further information on Nature Research policies, see our [Editorial Policies](#) and the [Editorial Policy Checklist](#).

### Statistics

For all statistical analyses, confirm that the following items are present in the figure legend, table legend, main text, or Methods section.

n/a Confirmed

- The exact sample size ( $n$ ) for each experimental group/condition, given as a discrete number and unit of measurement
- A statement on whether measurements were taken from distinct samples or whether the same sample was measured repeatedly
- The statistical test(s) used AND whether they are one- or two-sided  
*Only common tests should be described solely by name; describe more complex techniques in the Methods section.*
- A description of all covariates tested
- A description of any assumptions or corrections, such as tests of normality and adjustment for multiple comparisons
- A full description of the statistical parameters including central tendency (e.g. means) or other basic estimates (e.g. regression coefficient) AND variation (e.g. standard deviation) or associated estimates of uncertainty (e.g. confidence intervals)
- For null hypothesis testing, the test statistic (e.g.  $F$ ,  $t$ ,  $r$ ) with confidence intervals, effect sizes, degrees of freedom and  $P$  value noted  
*Give  $P$  values as exact values whenever suitable.*
- For Bayesian analysis, information on the choice of priors and Markov chain Monte Carlo settings
- For hierarchical and complex designs, identification of the appropriate level for tests and full reporting of outcomes
- Estimates of effect sizes (e.g. Cohen's  $d$ , Pearson's  $r$ ), indicating how they were calculated

*Our web collection on [statistics for biologists](#) contains articles on many of the points above.*

### Software and code

Policy information about [availability of computer code](#)

Data collection

Data analysis

DeTiN (version 47efdff) (<https://github.com/getzlab/deTiN>)  
 VEP release 104 (<https://www.ensembl.org/vep>)  
 Oncotator version4 GATK (<https://software.broadinstitute.org/cancer/cga/oncotator>)  
 vcf2maf (version 1.6.17) (<https://github.com/mskcc/vcf2maf>)  
 ConcatRef v1.0 (<https://zenodo.org/record/3465870#.XzCushNKi3l>)  
 Absolute v1.0 (<https://software.broadinstitute.org/cancer/cga/absolute>)  
 COBRA v1.0 (<https://bitbucket.org/cfce/cobra/src/master/>)  
 scCNV v1.0 (<https://qiuxintao101.github.io/scCNV/>)

For manuscripts utilizing custom algorithms or software that are central to the research but not yet described in published literature, software must be made available to editors and reviewers. We strongly encourage code deposition in a community repository (e.g. GitHub). See the Nature Research [guidelines for submitting code & software](#) for further information.

## Data

Policy information about [availability of data](#)

All manuscripts must include a [data availability statement](#). This statement should provide the following information, where applicable:

- Accession codes, unique identifiers, or web links for publicly available datasets
- A list of figures that have associated raw data
- A description of any restrictions on data availability

Figures 1-4 and supplementary figures 1- 4 all have associated raw data. These ChIP-seq data, RNA-seq data and ATAC-seq data have been uploaded to GEO (GSE156292)

In Figure 1,2 we compare our data to previously published data available on the TCGA (<https://portal.gdc.cancer.gov/>) and GEO (GSE110853) and GSM3321000.

## Field-specific reporting

Please select the one below that is the best fit for your research. If you are not sure, read the appropriate sections before making your selection.

- Life sciences     Behavioural & social sciences     Ecological, evolutionary & environmental sciences

For a reference copy of the document with all sections, see [nature.com/documents/nr-reporting-summary-flat.pdf](https://nature.com/documents/nr-reporting-summary-flat.pdf)

## Life sciences study design

All studies must disclose on these points even when the disclosure is negative.

|                 |                                                                                                                                         |
|-----------------|-----------------------------------------------------------------------------------------------------------------------------------------|
| Sample size     | We did not perform sample size calculation and used all available cases to maximize our power for comparison in our chromatin analyses. |
| Data exclusions | We excluded datasets that were less than 1000 peaks identified by MACS2.                                                                |
| Replication     | A subset of the LuCaP samples were replicated twice to establish the consistency of our protocol.                                       |
| Randomization   | Not relevant as there were no clinical treatments being tested.                                                                         |
| Blinding        | Not relevant as there were no clinical treatments being tested.                                                                         |

## Reporting for specific materials, systems and methods

We require information from authors about some types of materials, experimental systems and methods used in many studies. Here, indicate whether each material, system or method listed is relevant to your study. If you are not sure if a list item applies to your research, read the appropriate section before selecting a response.

### Materials & experimental systems

| n/a                                 | Involved in the study                                           |
|-------------------------------------|-----------------------------------------------------------------|
| <input type="checkbox"/>            | <input checked="" type="checkbox"/> Antibodies                  |
| <input type="checkbox"/>            | <input checked="" type="checkbox"/> Eukaryotic cell lines       |
| <input checked="" type="checkbox"/> | <input type="checkbox"/> Palaeontology and archaeology          |
| <input checked="" type="checkbox"/> | <input type="checkbox"/> Animals and other organisms            |
| <input type="checkbox"/>            | <input checked="" type="checkbox"/> Human research participants |
| <input checked="" type="checkbox"/> | <input type="checkbox"/> Clinical data                          |
| <input checked="" type="checkbox"/> | <input type="checkbox"/> Dual use research of concern           |

### Methods

| n/a                                 | Involved in the study                           |
|-------------------------------------|-------------------------------------------------|
| <input type="checkbox"/>            | <input checked="" type="checkbox"/> ChIP-seq    |
| <input checked="" type="checkbox"/> | <input type="checkbox"/> Flow cytometry         |
| <input checked="" type="checkbox"/> | <input type="checkbox"/> MRI-based neuroimaging |

## Antibodies

Antibodies used    H3K27Ac antibody (Diagenode cat# C15410196), ASCL1 antibody (abcam ab74065), NEUROD1 antibody (Cell Signalling mAb #4373,

clone D35G2)

Validation

H3K27Ac, ASCL1 and NEUROD1 are validated for ChIP applications by qPCR for enrichment at known binding sites in validated cell lines as described on the manufacturers website.

## Eukaryotic cell lines

Policy information about [cell lines](#)

Cell line source(s)

H660 was obtained from ATCC.  
EF-1 cells were obtained from Leigh Ellis (DFCI).

Authentication

Not authenticated.

Mycoplasma contamination

All cell lines tested negative for mycoplasma.

Commonly misidentified lines  
(See [ICLAC](#) register)

no commonly misidentified cell lines were used in the study.

## Human research participants

Policy information about [studies involving human research participants](#)

Population characteristics

Patients were all male with median age at diagnosis in years (SD) of 64 (8.3), median age at death in years (SD) was 70 (9.2), median PSA at death in ng/mL (range) was 288.1 (0.2-5690.8), Gleason score (range) was 6-10. All patients had received Androgen Ablation Therapy.

Recruitment

All patients signed informed consent for a rapid autopsy, under the aegis of the Prostate Cancer Donor Program at the University of Washington. Patients are all male with late stage disease and there are no known biases that may affect the results presented in this paper.

Ethics oversight

The Institutional Review Board of the University of Washington (IRB #2341) approved this study.

Note that full information on the approval of the study protocol must also be provided in the manuscript.

## ChIP-seq

### Data deposition

 Confirm that both raw and final processed data have been deposited in a public database such as [GEO](#). Confirm that you have deposited or provided access to graph files (e.g. BED files) for the called peaks.

Data access links

*May remain private before publication.*

GEO access: data uploaded, GSE156292

Files in database submission

20190605\_ASCL1\_2Ab\_145\_1\_PC7059\_S2\_R1\_001.fastq.gz  
 20190605\_ASCL1\_2Ab\_145\_1\_PC7059\_S2\_R2\_001.fastq.gz  
 20190626\_PC2\_93\_ASCL1\_PC7165\_S2\_R1\_001.fastq.gz  
 20190626\_PC5\_49\_ASCL1\_PC7165\_S5\_R1\_001.fastq.gz  
 20190731\_H660\_ASCL1\_KL7258\_S7\_R1\_001.fastq.gz  
 20190828\_Lucap173\_1E\_H3K27Ac\_KL7362\_KL7362\_S7\_R1\_001.fastq.gz  
 20191030\_MKCC\_EF1-H3K27Ac\_KL7532\_S9\_R1\_001.fastq.gz  
 20191030\_MKCC\_EF1-H3K27Ac\_KL7532\_S9\_R2\_001.fastq.gz  
 20200116\_LUCAP173\_1\_S1\_NeuroD\_SS7756\_S1\_R1\_001.fastq.gz  
 K27PX1731\_1.fq.gz  
 K27PX1731\_2.fq.gz  
 ASCL1\_2Ab\_145\_1.rep1\_treat\_pileup.bw  
 EF1\_cfce.rep1\_treat\_pileup.bw  
 H660\_ASCL1.rep1\_treat\_pileup.bw  
 K27ac\_PDX\_173\_1\_new.rep1\_treat\_pileup.bw  
 Lucap173\_1E\_H3K27Ac.rep1\_treat\_pileup.bw  
 K27ac\_1452\_LP\_USPD16086066\_HLLNWBXX\_L4\_1.fq.gz  
 K27ac\_1452\_LP\_USPD16086066\_HLLNWBXX\_L4\_2.fq.gz  
 S1451\_LP\_K27ac\_USPD16084579\_HJGLKBBXX\_L7\_1.fq.gz  
 S1451\_LP\_K27ac\_USPD16084579\_HJGLKBBXX\_L7\_2.fq.gz  
 S49\_LP\_K27ac\_USPD16084583\_HJGLKBBXX\_L7\_1.fq.gz  
 S49\_LP\_K27ac\_USPD16084583\_HJGLKBBXX\_L7\_2.fq.gz  
 s93\_PDX\_K27ac\_USPD16086058\_HLLNWBXX\_L3\_1.fq.gz  
 s93\_PDX\_K27ac\_USPD16086058\_HLLNWBXX\_L3\_2.fq.gz  
 K27ac\_PDX\_145\_1.rep1\_treat\_pileup.bw  
 K27ac\_PDX\_145\_2.rep1\_treat\_pileup.bw

K27ac\_PDX\_49.rep1\_treat\_pileup.bw  
 K27ac\_PDX\_93.rep1\_treat\_pileup.bw  
 LUCAP173\_1\_S1\_NeuroD.rep1\_treat\_pileup.bw  
 PC2\_93\_ASCL1.rep1\_treat\_pileup.bw  
 PC5\_49\_ASCL1.rep1\_treat\_pileup.bw

Genome browser session  
 (e.g. [UCSC](#))

[http://genome.ucsc.edu/cgi-bin/hgTracks?db=hg19&lastVirtModeType=default&lastVirtModeExtraState=&virtModeType=default&virtMode=0&nonVirtPosition=&position=chr2%3A121478088%2D121721286&hgsid=877034177\\_akxcOL5bINlaloGMz2vnAjCkF2qs](http://genome.ucsc.edu/cgi-bin/hgTracks?db=hg19&lastVirtModeType=default&lastVirtModeExtraState=&virtModeType=default&virtMode=0&nonVirtPosition=&position=chr2%3A121478088%2D121721286&hgsid=877034177_akxcOL5bINlaloGMz2vnAjCkF2qs)

## Methodology

|                         |                                                                                                                                                                                                                                                                                                                                                                                                                                                                                                                                                                                                                                                                                                                                                                                                                                                                                                                                                                                                                                                                                                                                                                                                                                                                                                                           |
|-------------------------|---------------------------------------------------------------------------------------------------------------------------------------------------------------------------------------------------------------------------------------------------------------------------------------------------------------------------------------------------------------------------------------------------------------------------------------------------------------------------------------------------------------------------------------------------------------------------------------------------------------------------------------------------------------------------------------------------------------------------------------------------------------------------------------------------------------------------------------------------------------------------------------------------------------------------------------------------------------------------------------------------------------------------------------------------------------------------------------------------------------------------------------------------------------------------------------------------------------------------------------------------------------------------------------------------------------------------|
| Replicates              | Replicates were not used on PDX models after validation shown in Supplemental figure 1.                                                                                                                                                                                                                                                                                                                                                                                                                                                                                                                                                                                                                                                                                                                                                                                                                                                                                                                                                                                                                                                                                                                                                                                                                                   |
| Sequencing depth        | All libraries were sequenced to a minimum depth of 10M reads with exact numbers reported in Supplementary.                                                                                                                                                                                                                                                                                                                                                                                                                                                                                                                                                                                                                                                                                                                                                                                                                                                                                                                                                                                                                                                                                                                                                                                                                |
| Antibodies              | H3K27Ac antibody (Diagenode cat# C15410196), ASCL1 antibody (abcam ab74065), NEUROD1 antibody (Cell Signalling mAb #4373)                                                                                                                                                                                                                                                                                                                                                                                                                                                                                                                                                                                                                                                                                                                                                                                                                                                                                                                                                                                                                                                                                                                                                                                                 |
| Peak calling parameters | Peaks were called with MACS2 using default parameters.<br>Super-enhancers were called using ROSE using default parameters.                                                                                                                                                                                                                                                                                                                                                                                                                                                                                                                                                                                                                                                                                                                                                                                                                                                                                                                                                                                                                                                                                                                                                                                                |
| Data quality            | We required a FrIP > 2%; DNASE1 overlap > 85% and the number of peaks > 1,000 at an FDR of 0.001                                                                                                                                                                                                                                                                                                                                                                                                                                                                                                                                                                                                                                                                                                                                                                                                                                                                                                                                                                                                                                                                                                                                                                                                                          |
| Software                | Chilin Pipeline 2.0.0 ( <a href="http://cistrome.org/chilin/">http://cistrome.org/chilin/</a> )<br>BWA (version 0.7.17-r1188)<br>MACS2 (version v2.1.2)<br>ROSE ( <a href="http://younglab.wi.mit.edu/super_enhancer_code.html">http://younglab.wi.mit.edu/super_enhancer_code.html</a> )<br>Cistrome ( <a href="http://cistrome.org/">http://cistrome.org/</a> )<br>Integrative genomics viewer (IGV v2.3) ( <a href="https://software.broadinstitute.org/software/igv/">https://software.broadinstitute.org/software/igv/</a> )<br>Deeptools (version 2.5.4)<br>GREAT ( <a href="http://great.stanford.edu/public/html/">http://great.stanford.edu/public/html/</a> )<br>Cufflinks ( <a href="http://cole-trapnell-lab.github.io/cufflinks/">http://cole-trapnell-lab.github.io/cufflinks/</a> )<br>Cell Ranger (version 3.1.0)<br>Cell Ranger ATAC (version 1.2.0)<br>Seurat ( <a href="https://satijalab.org/seurat/vignettes.html">https://satijalab.org/seurat/vignettes.html</a> )<br>GenomicRanges ( <a href="https://bioconductor.org/packages/release/bioc/html/GenomicRanges.html">https://bioconductor.org/packages/release/bioc/html/GenomicRanges.html</a> )<br>COBRA ( <a href="https://bitbucket.org/cfce/cobra/src/master/">https://bitbucket.org/cfce/cobra/src/master/</a> )<br>GSVAs (version 1.40.1) |
